# Supplementary material
Source: PubMed Central journal article supplement (PMC2913298)
Supplement: NIHMS211906-supplement-2_si_002.pdf [file NIHMS211906-supplement-2_si_002.pdf]

Supporting Information for:

## **Three-Coordinate Terminal Imidoiron(III) Complexes: Structure, Spectroscopy, and Mechanism of Formation**

Ryan E. Cowley, Nathan J. DeYonker, Nathan A. Eckert, Thomas R. Cundari,\* Serena DeBeer George,\* Eckhard Bill,\* Xavier Ottenwaelder, Christine Flaschenriem, Patrick L. Holland\*

### **Full Citation for Reference 66**

Gaussian 03, Revision D.02, Frisch, M. J.; Trucks, G. W.; Schlegel, H. B.; Scuseria, G. E.; Robb, M. A.; Cheeseman, J. R.; Montgomery, Jr., J. A.; Vreven, T.; Kudin, K. N.; Burant, J. C.; Millam, J. M.; Iyengar, S. S.; Tomasi, J.; Barone, V.; Mennucci, B.; Cossi, M.; Scalmani, G.; Rega, N.; Petersson, G. A.; Nakatsuji, H.; Hada, M.; Ehara, M.; Toyota, K.; Fukuda, R.; Hasegawa, J.; Ishida, M.; Nakajima, T.; Honda, Y.; Kitao, O.; Nakai, H.; Klene, M.; Li, X.; Knox, J. E.; Hratchian, H. P.; Cross, J. B.; Bakken, V.; Adamo, C.; Jaramillo, J.; Gomperts, R.; Stratmann, R. E.; Yazyev, O.; Austin, A. J.; Cammi, R.; Pomelli, C.; Ochterski, J. W.; Ayala, P. Y.; Morokuma, K.; Voth, G. A.; Salvador, P.; Dannenberg, J. J.; Zakrzewski, V. G.; Dapprich, S.; Daniels, A. D.; Strain, M. C.; Farkas, O.; Malick, D. K.; Rabuck, A. D.; Raghavachari, K.; Foresman, J. B.; Ortiz, J. V.; Cui, Q.; Baboul, A. G.; Clifford, S.; Cioslowski, J.; Stefanov, B. B.; Liu, G.; Liashenko, A.; Piskorz, P.; Komaromi, I.; Martin, R. L.; Fox, D. J.; Keith, T.; Al-Laham, M. A.; Peng, C. Y.; Nanayakkara, A.; Challacombe, M.; Gill, P. M. W.; Johnson, B.; Chen, W.; Wong, M. W.; Gonzalez, C.; and Pople, J. A.; Gaussian, Inc., Wallingford CT, 2004.

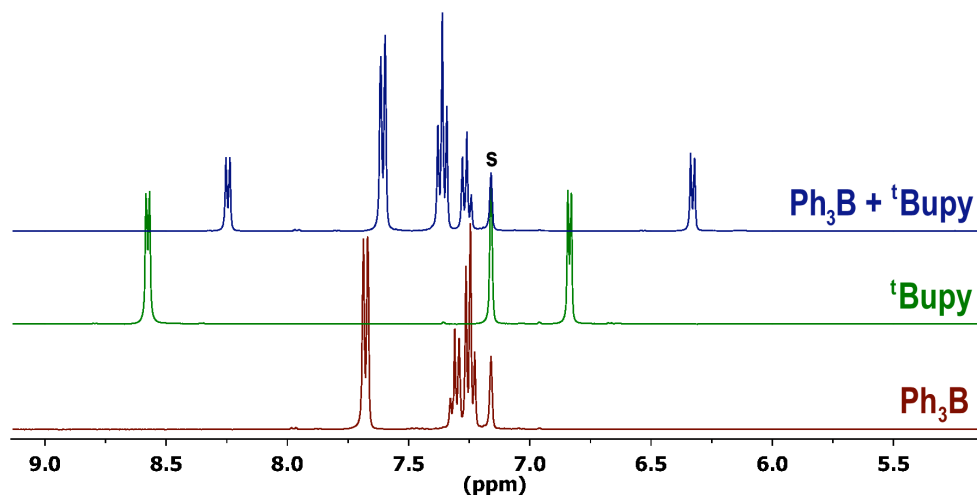

**Figure S-1.**  $^1\text{H}$  NMR spectra of  $\text{Ph}_3\text{B}$ ,  $^t\text{Bupy}$ , and a 1:1 mixture of  $\text{Ph}_3\text{B}:\text{}^t\text{Bupy}$  in  $\text{C}_6\text{D}_6$ . The residual  $\text{C}_6\text{D}_5\text{H}$  peak is marked with "s". An additional peak for  $^t\text{Bu-H}$  is present at  $\delta$  1.002 ( $^t\text{Bupy}$ ) and  $\delta$  0.745 ( $\text{BPh}_3:\text{}^t\text{Bupy}$ ) ppm, respectively.

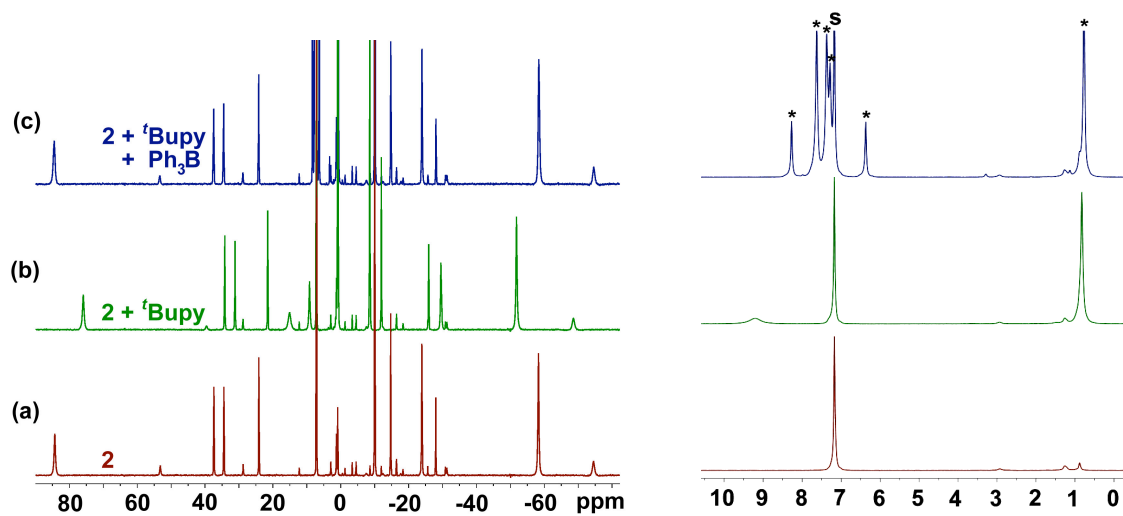

**Figure S-2.**  $^1\text{H}$  NMR spectra of (a) compound **2**; (b) compound **2** with added  $^t\text{Bupy}$ ; and (c) upon addition of  $\text{BPh}_3$  to the mixture in (b). Right: inset of the 0 – 10 ppm region. Peaks marked with asterisks match the compound " $\text{Ph}_3\text{B}:\text{}^t\text{Bupy}$ " in the spectrum shown in Figure S-1.

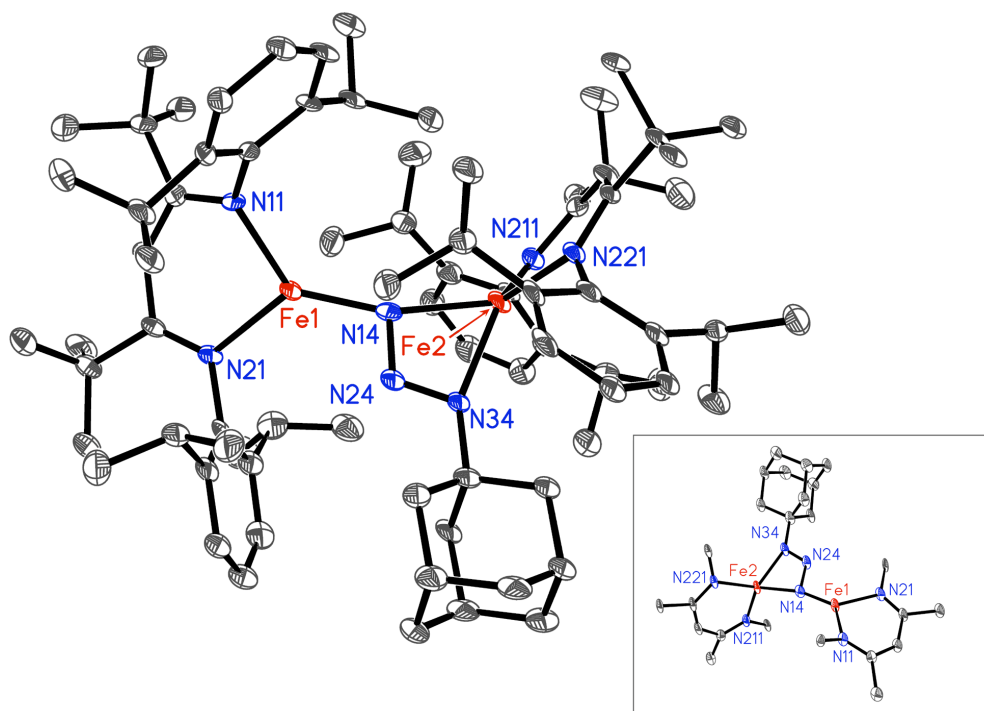

**Figure S-3.** Thermal ellipsoid plot of  $L^{tBu}Fe(\mu-N_3Ad)FeL^{tBu}$  at 50% probability. Hydrogens and co-crystallized pentane molecules are removed for clarity. *Inset:* Alternate view with the 2,6-diisopropylphenyl and *tert*-butyl groups removed for clarity.

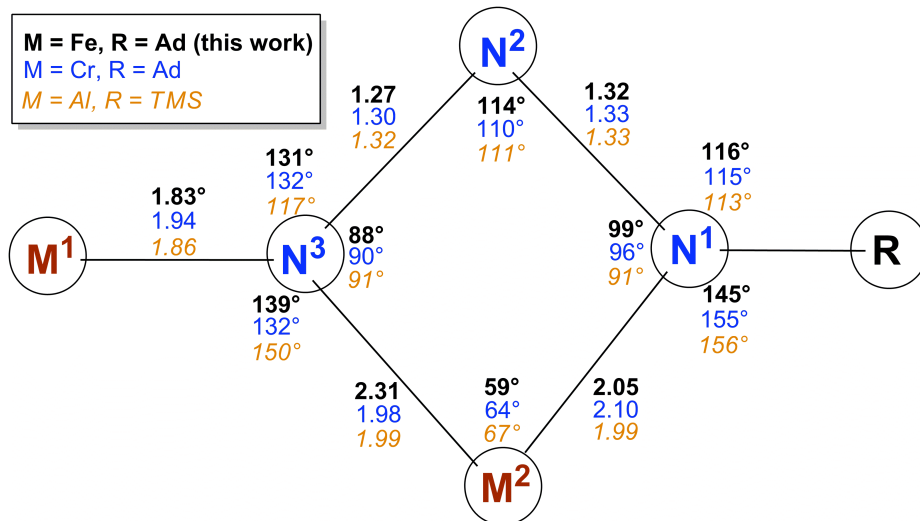

**Figure S-4.** Comparison of core bond metrics in the DFT model of  $\{L^{Me}Fe\}_2(\mu-N_3Ad)$  to two crystallographically characterized literature complexes (Cr: Ni, C.; Ellis, B. D.; Long, G. J.; Power, P. P. *Chem. Commun.* **2009**, 2332-2334; Al: Uhl, W.; Gerding, R.; Pohl, S.; Saak, W. *Chem. Ber.* **1995**, 128, 81-85).

**Table S-1.** Crystal data for **2**, **3**, and  $L^{tBu}Fe(\mu-N_3Ad)FeL^{tBu}$ .

|                                                      | $L^{Me}Fe=NAd$ ( <b>2</b> )    | $L^{Me}FeNHAd$ ( <b>3</b> )    | $L^{tBu}Fe(\mu-N_3Ad)FeL^{tBu} \cdot 2C_5H_{12}$ |
|------------------------------------------------------|--------------------------------|--------------------------------|--------------------------------------------------|
| Empirical formula                                    | $C_{39}H_{56}FeN_3$            | $C_{39}H_{57}FeN_3$            | $C_{90}H_{145}Fe_2N_7$                           |
| Formula weight                                       | 622.72                         | 623.73                         | 1436.83                                          |
| Data collection temperature (°C)                     | -100                           | -80                            | -100                                             |
| Color, habit                                         | Dark yellow, plate             | Yellow, plate                  | Dark orange, rod                                 |
| crystal size (mm <sup>3</sup> )                      | $0.24 \times 0.16 \times 0.04$ | $0.47 \times 0.42 \times 0.10$ | $0.28 \times 0.12 \times 0.08$                   |
| Crystal system                                       | Monoclinic                     | Monoclinic                     | Triclinic                                        |
| Space group                                          | $P2_1/c$                       | $P2_1/c$                       | $P\bar{1}$                                       |
| $a$ (Å)                                              | 11.134(3)                      | 10.9816(7)                     | 13.282(3)                                        |
| $b$ (Å)                                              | 12.925(4)                      | 13.1386(8)                     | 15.629(3)                                        |
| $c$ (Å)                                              | 25.274(8)                      | 25.7345(15)                    | 21.057(4)                                        |
| $\alpha$ (°)                                         | 90                             | 90                             | 94.791(4)                                        |
| $\beta$ (°)                                          | 93.059(6)                      | 95.0910(10)                    | 102.722(4)                                       |
| $\gamma$ (°)                                         | 90                             | 90                             | 93.567(4)                                        |
| $V$ (Å <sup>3</sup> )                                | 3631.8(19)                     | 3698.4(4)                      | 4234.4(15)                                       |
| $Z$                                                  | 4                              | 4                              | 2                                                |
| $\theta$ range for data collection (°)               | 1.77 to 33.14                  | 1.74 to 28.30                  | 1.57 to 25.03                                    |
| $\rho$ (calcd) (g/cm <sup>3</sup> )                  | 1.139                          | 1.120                          | 1.127                                            |
| $\mu$ (mm <sup>-1</sup> )                            | 0.444                          | 0.436                          | 0.389                                            |
| $R$ (int)                                            | 0.0887                         | 0.0411                         | 0.1404                                           |
| $R1$ ( $F^2$ , $I > 2\sigma(I)$ )                    | 0.0519                         | 0.0551                         | 0.0898                                           |
| $wR2$ ( $F^2$ , all data)                            | 0.1297                         | 0.1436                         | 0.2449                                           |
| GOF                                                  | 1.014                          | 1.044                          | 1.027                                            |
| largest residual density ( $e \cdot \text{Å}^{-3}$ ) | 0.529 and -0.325               | 0.628 and -0.531               | 1.311 and -1.153                                 |

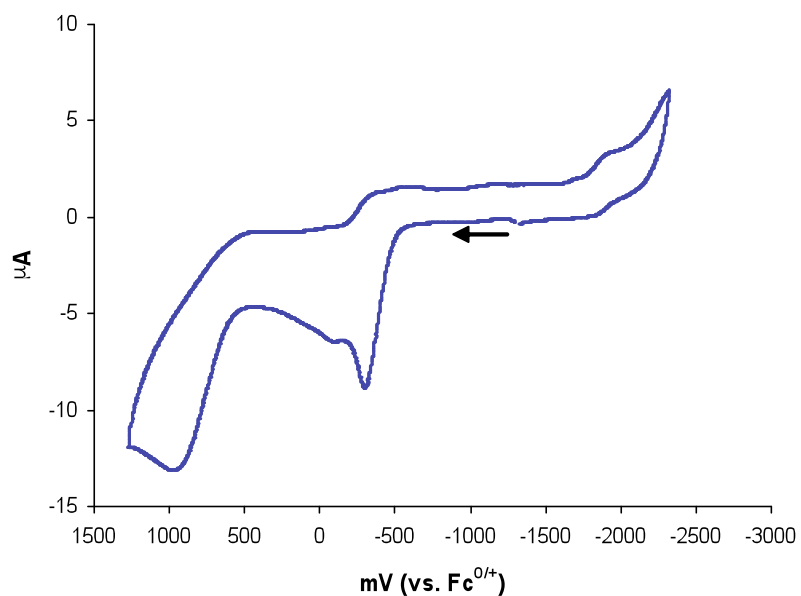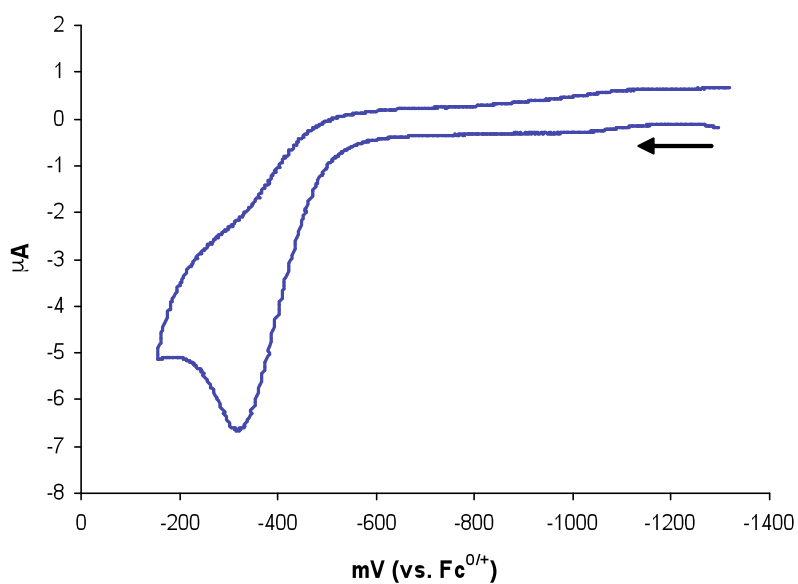

**Figure S-5.** Cyclic voltammograms of **2** in Et<sub>2</sub>O (2 mM), with 0.1 M [nBu<sub>4</sub>N][BAR<sup>F</sup>] supporting electrolyte. CV measurements were obtained using a Cypress Systems 3100 potentiostat. The working electrode was glassy carbon with a 1 mm diameter working area, and Ag wires were used as auxiliary and reference electrodes. All measurements were referenced with a ferrocene standard, and reported relative to the Cp<sub>2</sub>Fe<sup>+0</sup> couple.



**Table S-3.** Calculated Lowest Energy Linkage Isomers of  $L^{\text{Me}}\text{Fe}(\text{N}_3\text{Ad})(\text{py})^a$ 

| Isomer                | Multiplicity | $\Delta G_{\text{rel}}^b$ |
|-----------------------|--------------|---------------------------|
| $\kappa N^{\text{I}}$ | 4            | +8.5                      |
| $\kappa N^{\text{I}}$ | 6            | +7.4                      |
| $\kappa N^{\text{3}}$ | 4            | +0.0                      |
| $\kappa N^{\text{3}}$ | 6            | +6.9                      |
| $\eta^2$              | 4            | +2.3                      |
| $\eta^2$              | 6            | <sup>c</sup>              |

<sup>a</sup> Calculated at the B3LYP/6-311+G(d):UFF level of theory

<sup>b</sup> Relative to the lowest energy linkage isomer in kcal/mol (1 atm, 298.15 K)

<sup>c</sup> This complex is not stable at this level of theory, and converts upon QM/MM geometry optimization to the sextet  $\kappa N^{\text{3}}$  isomer.

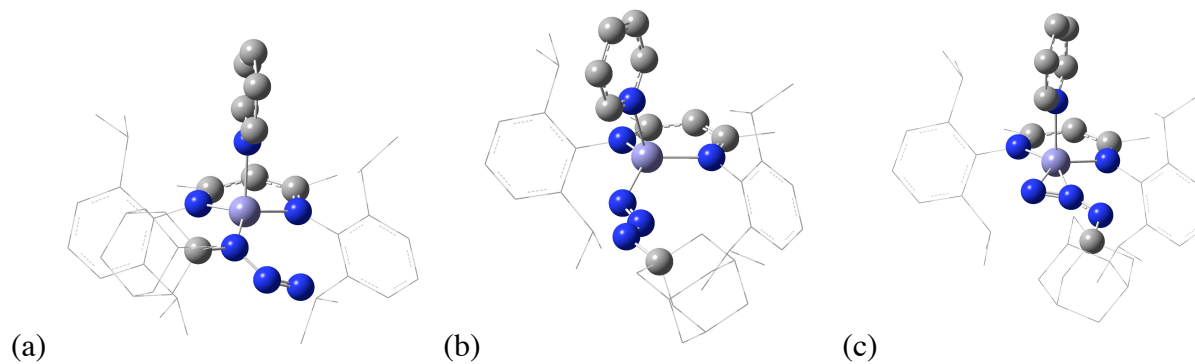

**Figure S-7.** QM/MM optimized geometries of three low energy linkage isomers of  $L^{\text{Me}}\text{Fe}(\text{N}_3\text{Ad})(\text{py})$ : (a) sextet  $\kappa N^{\text{I}}$ , (b) quartet  $\kappa N^{\text{3}}$ , and (c) quartet  $\eta^2$ . QM atoms are shown as spheres, and MM atoms are shown in wireframe. Hydrogens omitted from figure for clarity.



Sextet compounds are in blue  
 Quartet compounds are in green  
 - ONIOM(B3LYP/6-311+G(d):UFF)  
 - data are  $\Delta G$ 's (kcal/mol)  
 - values are relative to  
 $L^{\text{Me}}\text{Fe}(\text{N}_3\text{Ad}-\kappa\text{N}^1)$   
 - Me, Ar & Ad (except  $\text{C}_\alpha$ ) are UFF  
 - remainder is QM

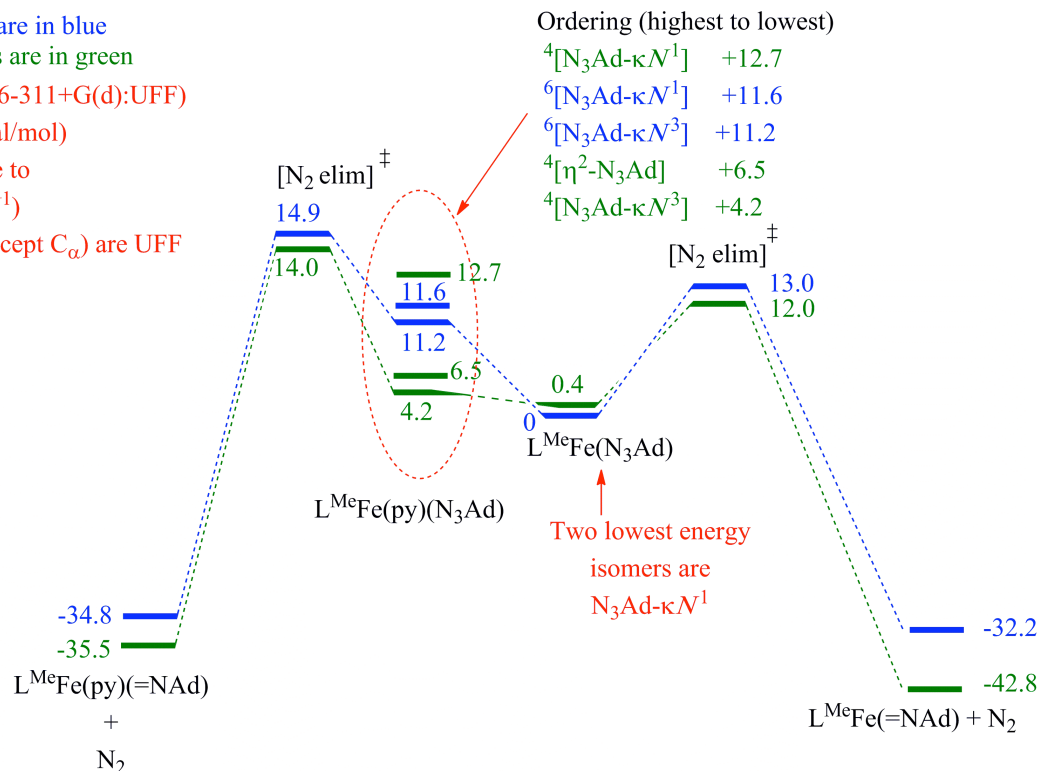

**Figure S-8.** Potential energy surface showing the relative energies of intermediates and transition states for  $\text{N}_2$  loss. The energies ( $\Delta G$ , kcal/mol) are given relative to  ${}^6L^{\text{Me}}\text{Fe}(\text{N}_3\text{Ad}-\kappa\text{N}^1)$ . Species with sextet spin states are blue and species with quartet spin states are green.

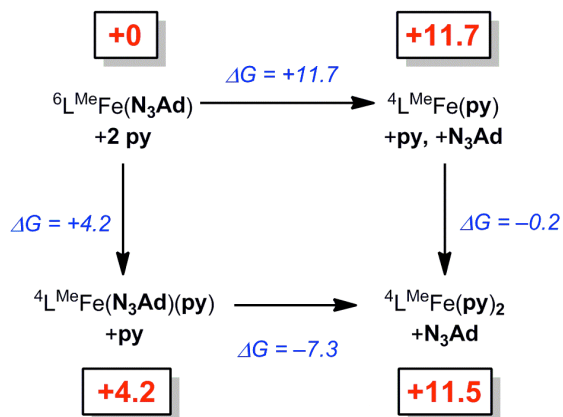

**Figure S-9.** Calculated thermodynamic cycle for pyridine coordination/exchange from  $L^{\text{Me}}\text{Fe}(\text{N}_3\text{Ad})$ . The energies ( $\Delta G$ , kcal/mol) are given relative to  ${}^6L^{\text{Me}}\text{Fe}(\text{N}_3\text{Ad}-\kappa\text{N}^1)$ .

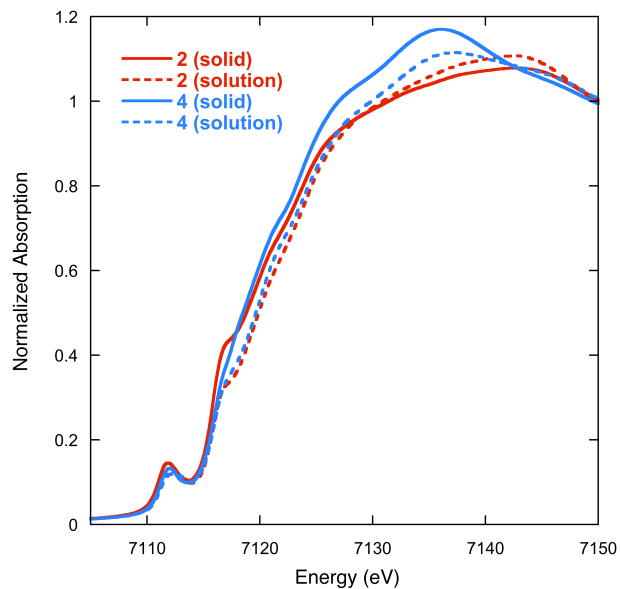

**Figure S-10.** Comparison of the normalized Fe K-edge XAS data for **2** (red) and **4** (blue) as solids and in solution.

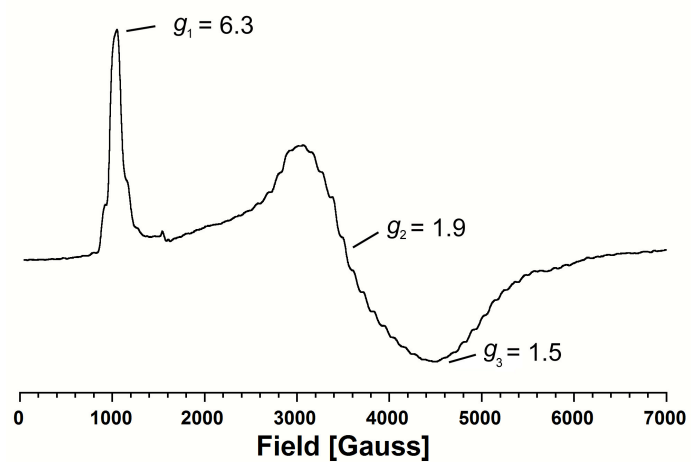

**Figure S-11.** X-band EPR spectrum of a 9.8 mM sample of **2** in THF. Parameters:  $T = 7$  K;  $\nu = 9.4110$  GHz; time constant = 100 ms; modulation = 15 G; power = 167  $\mu$ W.

**Table S-4.** Compounds used in the Fe–N<sub>diketiminato</sub> bond length analysis from the CSD v. 5.31 (Feb 2010 update). Only neutral molecules with  $\eta^1$ -coordinated ligands and unambiguous oxidation states are considered in the survey.

| <b>Compound</b>                                                              | <b>Fe Ox. State</b> | <b>Coordination Number</b> | <b>CSD Refcode</b> | <b>Fe–N<sub>avg</sub> (Å)</b> |
|------------------------------------------------------------------------------|---------------------|----------------------------|--------------------|-------------------------------|
| L <sup>Me,iPr2</sup> Fe(PPh <sub>3</sub> )                                   | 1                   | 3                          | PECMOA             | 1.956                         |
| L <sup>tBu,iPr2</sup> Fe( $\mu$ -Cl)K(18-c-6)                                | 1                   | 3                          | PECNOB             | 1.934                         |
| L <sup>tBu,iPr2</sup> Fe(CO) <sub>2</sub>                                    | 1                   | 4                          | WOBGUQ             | 1.967                         |
| L <sup>Me,iPr2</sup> Fe(CN <sup>t</sup> Bu) <sub>2</sub>                     | 1                   | 4                          | AFUDOV             | 1.9695                        |
| L <sup>Me,iPr2</sup> Fe(CO) <sub>3</sub>                                     | 1                   | 5                          | PECMUG             | 1.983                         |
| L <sup>tBu,iPr2</sup> Fe(CO) <sub>3</sub>                                    | 1                   | 5                          | PECNAN             | 1.9655                        |
| L <sup>tBu,iPr2</sup> Fe(CN <sup>t</sup> Bu) <sub>3</sub>                    | 1                   | 5                          | COWFUQ             | 2.039                         |
| L <sup>tBu,iPr2</sup> Fe(3-hexenyl)                                          | 2                   | 3                          | AQUGAU             | 1.989                         |
| L <sup>tBu,iPr2</sup> Fe(N(Ph)NHPH)                                          | 2                   | 3                          | AQUGIC             | 1.99                          |
| L <sup>tBu,iPr2</sup> Fe(NHPH)                                               | 2                   | 3                          | AQUGOI             | 1.972                         |
| L <sup>Me,iPr2</sup> Fe(NCMe)( $\mu$ -S)FeL <sup>Me,iPr2</sup>               | 2                   | 3                          | BEQJOX             | 1.997                         |
| L <sup>tBu,iPr2</sup> Fe( <sup>t</sup> Bu)                                   | 2                   | 3                          | BIJHUY             | 1.9895                        |
| L <sup>Me,iPr2</sup> Fe(Me)                                                  | 2                   | 3                          | BIJJAG             | 1.9725                        |
| L <sup>Me,iPr2</sup> Fe(CH <sub>2</sub> CH <sub>2</sub> CF <sub>3</sub> )    | 2                   | 3                          | BIJJEK             | 1.974                         |
| L <sup>Me,iPr2</sup> Fe(CH <sub>2</sub> CH <sub>2</sub> CF <sub>3</sub> )    | 2                   | 3                          | BIJJEK             | 1.9735                        |
| L <sup>Me,iPr2</sup> Fe(CH(Me)Ph)                                            | 2                   | 3                          | BIJJIO             | 1.988                         |
| L <sup>Me,iPr2</sup> Fe(OCHPh <sub>2</sub> )                                 | 2                   | 3                          | BIJJOU             | 1.9655                        |
| L <sup>Me,iPr2</sup> Fe(N(Me)CH <sub>2</sub> Ph)                             | 2                   | 3                          | BIJJUA             | 1.973                         |
| L <sup>Me,iPr2</sup> Fe(Cy)                                                  | 2                   | 3                          | BIJKEL             | 1.985                         |
| L <sup>Me,iPr2</sup> Fe(NHdipp)                                              | 2                   | 3                          | DABQUT             | 1.996                         |
| L <sup>Me,iPr2</sup> Fe(OtBu)                                                | 2                   | 3                          | DABREE             | 1.9755                        |
| L <sup>tBu,iPr2</sup> Fe(CCPH)                                               | 2                   | 3                          | DABRUU             | 1.970                         |
| L <sup>tBu,iPr2</sup> Fe(CCPH)                                               | 2                   | 3                          | DABRUU             | 1.966                         |
| L <sup>tBu,iPr2</sup> Fe(NHdipp)                                             | 2                   | 3                          | DABSAB             | 1.9955                        |
| L <sup>tBu,iPr2</sup> Fe(NHtBu)                                              | 2                   | 3                          | DABSEF             | 1.984                         |
| L <sup>tBu,iPr2</sup> Fe(NHtol)                                              | 2                   | 3                          | DABSIJ             | 1.972                         |
| L <sup>tBu,iPr2</sup> Fe(NHxyl)                                              | 2                   | 3                          | DABSOP             | 1.997                         |
| L <sup>tBu,iPr2</sup> Fe(CH <sub>2</sub> Ph)                                 | 2                   | 3                          | HUJDEV             | 1.995                         |
| L <sup>tBu,iPr2</sup> Fe( <sup>i</sup> Pr)                                   | 2                   | 3                          | HUJDIZ             | 1.9945                        |
| [L <sup>tBu,iPr2</sup> Fe] <sub>2</sub> ( $\mu$ -O)                          | 2                   | 3                          | MARBEN             | 1.9855                        |
| L <sup>Me,iPr2</sup> Fe(CH <sub>2</sub> SiMe <sub>3</sub> )                  | 2                   | 3                          | MEGHOW             | 1.992                         |
| L <sup>Me,iPr2</sup> Fe(N(SiMe <sub>3</sub> ) <sub>2</sub> )                 | 2                   | 3                          | MONYIX             | 2.007                         |
| L <sup>Me,C6F5</sup> Fe(N(SiMe <sub>3</sub> ) <sub>2</sub> )                 | 2                   | 3                          | MONYOD             | 2.0005                        |
| L <sup>Me,C6F5</sup> Fe(N(SiMe <sub>3</sub> ) <sub>2</sub> )                 | 2                   | 3                          | MONYOD             | 2.0075                        |
| L <sup>Me,Me3</sup> Fe(N(SiMe <sub>3</sub> ) <sub>2</sub> )                  | 2                   | 3                          | MONYUJ             | 1.997                         |
| L <sup>Me,Me2</sup> Fe(N(SiMe <sub>3</sub> ) <sub>2</sub> )                  | 2                   | 3                          | MONZAQ             | 1.9945                        |
| L <sup>Me,Me2</sup> Fe(N(SiMe <sub>3</sub> ) <sub>2</sub> )                  | 2                   | 3                          | MONZAQ             | 1.994                         |
| L <sup>tBu,iPr2</sup> Fe(OtBu)                                               | 2                   | 3                          | MUNDII             | 1.979                         |
| L <sup>tBu,iPr2</sup> Fe(F)                                                  | 2                   | 3                          | NASJAT             | 1.961                         |
| L <sup>tBu,iPr2</sup> Fe(SSiMe <sub>3</sub> )                                | 2                   | 3                          | NASJIB             | 1.9725                        |
| L <sup>tBu,iPr2</sup> Fe(SSiMe <sub>3</sub> )                                | 2                   | 3                          | NASJIB             | 1.9715                        |
| L <sup>tBu,iPr2</sup> Fe(CCSiMe <sub>3</sub> )                               | 2                   | 3                          | NASJOH             | 1.9585                        |
| [L <sup>tBu,iPr2</sup> Fe] <sub>2</sub> ( $\mu$ -(OC(Me)(Ph)) <sub>2</sub> ) | 2                   | 3                          | PECNER             | 1.976                         |
| [L <sup>tBu,iPr2</sup> Fe] <sub>2</sub> ( $\mu$ -(OC(Me)(Ph)) <sub>2</sub> ) | 2                   | 3                          | PECNER             | 1.9845                        |
| L <sup>tBu,iPr2</sup> Fe(Cl)(NCMe)                                           | 2                   | 3                          | REWZUO             | 1.948                         |

|                                                |   |   |          |        |
|------------------------------------------------|---|---|----------|--------|
| $L^{Me,iPr_2}Fe(CH_2Ph)$                       | 2 | 3 | UGEMIC   | 1.982  |
| $L^{Me,iPr_2}Fe(CH_2Ph)$                       | 2 | 3 | UGEMIC   | 1.9785 |
| $[L^{tBu,iPr_2}Fe]_2(\mu-CO_3)$                | 2 | 3 | WIYFEQ   | 1.966  |
| $L^{tBu,iPr_2}Fe(tBu)$                         | 2 | 3 | WUFSIZ   | 2.0155 |
| $L^{Me,iPr_2}Fe(tBu)$                          | 2 | 3 | WUFSOF   | 1.983  |
| $L^{Me,iPr_2}Fe(Et)$                           | 2 | 3 | WUFSUL   | 1.9845 |
| $L^{tBu,iPr_2}Fe(Me)$                          | 2 | 3 | XOXHUN   | 1.973  |
| $L^{tBu,iPr_2}Fe(NCH^tBu)$                     | 2 | 3 | AFUFEN   | 1.9715 |
| $L^{tBu,iPr_2}Fe(NCH^tBu)$                     | 2 | 3 | AFUFEN   | 1.9695 |
| $L^{Me,iPr_2}Fe(C(Ph)CHPh)$                    | 2 | 3 | AFUFIR   | 1.9785 |
| $L^{Me,iPr_2}Fe(Ph)$                           | 2 | 3 | COGQIZ   | 1.972  |
| $[L^{tBu,iPr_3}Fe]_2(\mu-CO_3)$                | 2 | 3 | BOTNOO   | 1.9625 |
| $[L^{tBu,iPr_2}Fe(H)]_2$                       | 2 | 4 | AQUFUN   | 2.0055 |
| $L^{tBu,iPr_2}Fe(H)(tBupy)$                    | 2 | 4 | AQUGEY   | 2.0265 |
| $L^{Me,iPr_2}Fe(NCMe)(\mu-S)FeL^{Me,iPr_2}$    | 2 | 4 | BEQJOX   | 2.0345 |
| $[L^{Me,iPr_2}Fe(NH_2NHMe)]_2(\mu-S)$          | 2 | 4 | BEQJUD   | 2.0245 |
| $[L^{Me,iPr_2}Fe(NH_2NHMe)]_2(\mu-S)$          | 2 | 4 | BEQJUD   | 2.0315 |
| $[L^{Me,iPr_2}Fe(NH_2NMe_2)]_2(\mu-S)$         | 2 | 4 | BEQKAK   | 2.014  |
| $[L^{Me,iPr_2}Fe(NH_2NMe_2)]_2(\mu-S)$         | 2 | 4 | BEQKAK   | 2.0295 |
| $[L^{Me,iPr_2}Fe(NH_3)]_2(m-S)$                | 2 | 4 | BEQKEO   | 2.031  |
| $[L^{Me,iPr_2}Fe(CH_2CN)]_2$                   | 2 | 4 | BIJKAH   | 1.9985 |
| $[L^{Me,iPr_2}Fe(Cl)]_2$                       | 2 | 4 | DABPIG   | 2.004  |
| $L^{Me,iPr_2}Fe(NHdipp)(thf)$                  | 2 | 4 | DABPUS   | 2.0285 |
| $L^{Me,iPr_2}Fe(NHxyl)(thf)$                   | 2 | 4 | DABQAZ   | 2.030  |
| $L^{Me,iPr_2}Fe(\mu-Cl)(\mu-thf)Li(OEt_2)$     | 2 | 4 | DABQIH   | 2.0295 |
| $L^{Me,iPr_2}Fe(NHdipp)(NH_2dipp)$             | 2 | 4 | DABQUT   | 2.038  |
| $L^{Me,iPr_2}Fe(\mu-Cl)(\mu-NHtol)Li(OEt_2)_2$ | 2 | 4 | DABRAA   | 2.018  |
| $L^{tBu,iPr_2}Fe(NHdipp)(NCMe)$                | 2 | 4 | DABRII   | 2.016  |
| $L^{tBu,iPr_2}Fe(NHdipp)(tBupy)$               | 2 | 4 | DABROO   | 2.0385 |
| $L^{Me,iPr_2}Fe(tBu)(NCMe)$                    | 2 | 4 | JEWTEL   | 2.0245 |
| $L^{Me,iPr_2}Fe(CH_2tBu)(NCMe)$                | 2 | 4 | JEWVIP   | 2.028  |
| $L^{Me,iPr_2}Fe(Cl)(tBupy)$                    | 2 | 4 | JEWTOV   | 2.0055 |
| $L^{Me,iPr_2}Fe(Cl)(tBupy)$                    | 2 | 4 | JEWTOV   | 2.0045 |
| $L^{tBu,iPr_2}Fe(Cl)(NCMe)$                    | 2 | 4 | JEWTOV   | 1.9985 |
| $L^{tBu,iPr_2}Fe(Cl)(NCMe)$                    | 2 | 4 | JEWTOV   | 2.001  |
| $L^{Me,iPr_2}Fe(\mu-Me_2pz)(\mu-Cl)Li(thf)_2$  | 2 | 4 | LECPAL   | 2.011  |
| $[L^{tBu,iPr_3}Fe(H)]_2$                       | 2 | 4 | LIHTEC   | 1.983  |
| $[L^{tBu,iPr_3}Fe(H)]_2$                       | 2 | 4 | LIHTEC   | 2.0265 |
| $L^{Me,iPr_2}Fe(CH_2Ph)(py)$                   | 2 | 4 | MEGHUC   | 2.032  |
| $(L^{Me,C_6F_5})_2Fe$                          | 2 | 4 | MONZII   | 2.0255 |
| $(L^{Me,C_6F_5})_2Fe$                          | 2 | 4 | MONZII   | 2.0075 |
| $[L^{Me,iPr_2}Fe(F)]_2$                        | 2 | 4 | NASHUL   | 2.012  |
| $L^{tBu,iPr_2}Fe(F)(tBupy)$                    | 2 | 4 | NASJEX   | 2.011  |
| $L^{Me,iPr_2}Fe(F)(tBupy)$                     | 2 | 4 | NASJUN   | 2.0105 |
| $L^{Me,iPr_2}Fe(F)(CF_3py)$                    | 2 | 4 | NASKAU   | 2.011  |
| $L^{tBu,iPr_2}Fe(F)(NCMe)$                     | 2 | 4 | NASKEY   | 2.012  |
| $L^{tBu,iPr_2}Fe(FBF_3)(OEt_2)$                | 2 | 4 | NASKIC   | 1.992  |
| $[L^{Me,iPr_2}Fe(H)]_2$                        | 2 | 4 | NASKOI   | 1.9735 |
| $[L^{Me,iPr_2}Fe(H)]_2$                        | 2 | 4 | NASKOI   | 1.9825 |
| $L^{Me,iPr_2}Fe(\mu-Cl)_2Li(thf)_2$            | 2 | 4 | REWPOY   | 2.001  |
| $L^{Me,iPr_2}Fe(\mu-Cl)_2Li(thf)_2$            | 2 | 4 | REWPOY   | 1.9995 |
| $L^{Me,iPr_2}Fe(\mu-Cl)_2Li(thf)_2$            | 2 | 4 | REWPOY   | 2.0065 |
| $L^{Me,iPr_2}Fe(\mu-Cl)_2Li(thf)_2$            | 2 | 4 | REWPOY01 | 2.0135 |
| $L^{Me,iPr_2}Fe(\mu-Cl)_2Li(thf)_2$            | 2 | 4 | REWPOY01 | 2.0135 |
| $L^{Me,iPr_2}Fe(\mu-Cl)_2Li(OEt_2)_2$          | 2 | 4 | REWSOB   | 2.006  |
| $[L^{Me,iPr_2}Fe(Cl)]_2(\mu-MgCl_2(thf)_4)$    | 2 | 4 | REWZOI   | 2.0125 |

|                                                                             |   |   |        |        |
|-----------------------------------------------------------------------------|---|---|--------|--------|
| [L <sup>tBu,iPr2</sup> Fe] <sub>2</sub> (μ-CO <sub>3</sub> )                | 2 | 4 | WIYFEQ | 1.989  |
| [L <sup>tBu,iPr2</sup> Fe] <sub>2</sub> (μ-CO <sub>3</sub> )                | 2 | 4 | WIYFEQ | 1.9885 |
| [L <sup>tBu,iPr2</sup> Fe] <sub>2</sub> (μ-CO <sub>3</sub> )                | 2 | 4 | WIYFEQ | 2.0005 |
| [L <sup>Me,iPr2</sup> Fe(NHAd)(tBupy)]                                      | 2 | 4 | XEPHEG | 2.0285 |
| [L <sup>tBu,iPr2</sup> Fe(N <sub>3</sub> )] <sub>2</sub>                    | 2 | 4 | AFUDIP | 1.9885 |
| [L <sup>Me,iPr2</sup> Fe(NCHMe)] <sub>2</sub>                               | 2 | 4 | AFUDUB | 2.050  |
| [L <sup>Me,iPr2</sup> Fe] <sub>2</sub> (μ-NCH <sup>t</sup> Bu)(m-H)         | 2 | 4 | AFUFAJ | 2.0335 |
| [L <sup>Me,iPr2</sup> Fe] <sub>2</sub> (μ-NCH <sup>t</sup> Bu)(m-H)         | 2 | 4 | AFUFAJ | 2.037  |
| [L <sup>Me,iPr2</sup> Fe] <sub>2</sub> (μ-NCH <sup>t</sup> Bu)(m-H)         | 2 | 4 | AFUFAJ | 2.035  |
| [L <sup>Me,iPr2</sup> Fe] <sub>2</sub> (μ-NCH <sup>t</sup> Bu)(m-H)         | 2 | 4 | AFUFAJ | 2.0405 |
| [L <sup>Me,iPr2</sup> Fe(HCO <sub>2</sub> )] <sub>2</sub>                   | 2 | 4 | AFUGAK | 1.975  |
| [L <sup>tBu,iPr2</sup> Fe(HCO <sub>2</sub> )] <sub>2</sub>                  | 2 | 4 | AFUGEO | 2.006  |
| [L <sup>tBu,iPr2</sup> Fe(κ <sup>2</sup> -iPrNCHN <sup>i</sup> Pr)]         | 2 | 4 | AFUGIS | 2.0285 |
| [L <sup>Me,iPr2</sup> Fe(OH)] <sub>2</sub>                                  | 2 | 4 | AFUGOY | 2.0395 |
| [L <sup>tBu,iPr2</sup> Fe] <sub>2</sub> (μ-N <sub>6</sub> Ad <sub>2</sub> ) | 2 | 4 | IFECUS | 2.0305 |
| [L <sup>Me,iPr2</sup> Fe] <sub>2</sub> (μ-N <sub>6</sub> Ad <sub>2</sub> )  | 2 | 4 | IFEDAZ | 2.0185 |
| [L <sup>tBu,iPr3</sup> Fe] <sub>2</sub> (μ-CO <sub>3</sub> )                | 2 | 4 | BOTNOO | 1.9755 |
| [L <sup>tBu,iPr2</sup> Fe(OtBu)(OTf)]                                       | 3 | 4 | DABPEC | 1.966  |
| [L <sup>tBu,iPr2</sup> Fe(OtBu)(OTf)]                                       | 3 | 4 | DABPEC | 1.973  |
| [L <sup>tBu,iPr2</sup> Fe(NHdipp)(OTf)]                                     | 3 | 4 | DABPOM | 1.971  |
| [L <sup>Me,iPr2</sup> Fe(OtBu)(Cl)]                                         | 3 | 4 | DABQED | 1.977  |
| [L <sup>Me,iPr2</sup> Fe(OtBu)(OTf)]                                        | 3 | 4 | DABQON | 1.9645 |
| [L <sup>Me,iPr2</sup> Fe(PPh)] <sub>2</sub>                                 | 3 | 4 | MECCIH | 2.013  |
| [L <sup>Me,iPr2</sup> Fe(Cl)] <sub>2</sub>                                  | 3 | 4 | MONZUK | 1.9645 |

**Table S-5.** Average Fe–N<sub>diketiminato</sub> bond lengths (Å) from the CSD v. 5.31 (Feb 2010 update) organized by iron oxidation state and coordination number.

|                     |       |   |       |        |
|---------------------|-------|---|-------|--------|
| <u>3-coordinate</u> |       |   |       |        |
| Fe(I)               | 1.945 | ± | 0.013 | N = 2  |
| Fe(II)              | 1.982 | ± | 0.017 | N = 50 |
| <u>4-coordinate</u> |       |   |       |        |
| Fe(I)               | 1.968 | ± | 0.001 | N = 2  |
| Fe(II)              | 2.014 | ± | 0.020 | N = 61 |
| Fe(III)             | 1.976 | ± | 0.021 | N = 7  |
| <u>5-coordinate</u> |       |   |       |        |
| Fe(I)               | 1.996 | ± | 0.038 | N = 3  |
| Fe(II)              | 1.987 | ± | 0.005 | N = 1  |

**Table S-6.** Imido complexes of Fe, Co, and Ni used in the bond metric analysis from the CSD.

| <b>CSD<br/>Refcode</b>           | <b>metal</b> | <b>coordination<br/>number</b> | <b>Geometry</b> | <b>M=N–C<br/>angle (°)</b> | <b>M=N bond<br/>length (Å)</b> |
|----------------------------------|--------------|--------------------------------|-----------------|----------------------------|--------------------------------|
| PEKWUY                           | Fe           | 4                              | square planar   | 159.00                     | 1.716                          |
| PEKXAF                           | Fe           | 4                              | square planar   | 165.68                     | 1.705                          |
| MOBNUN                           | Fe           | 4                              | tetrahedral     | 176.83                     | 1.618                          |
| MOBNEX                           | Fe           | 4                              | tetrahedral     | 177.01                     | 1.625                          |
| SESQEM                           | Fe           | 4                              | tetrahedral     | 178.64                     | 1.635                          |
| CEKBOK                           | Fe           | 4                              | tetrahedral     | 173.72                     | 1.609                          |
| CEKBUQ                           | Fe           | 4                              | tetrahedral     | 176.26                     | 1.634                          |
| CEKBEA                           | Fe           | 4                              | tetrahedral     | 173.01                     | 1.630                          |
| CEKBIE                           | Fe           | 4                              | tetrahedral     | 172.27                     | 1.650                          |
| OLAXOO                           | Fe           | 4                              | tetrahedral     | 175.97                     | 1.638                          |
| SEYGUZ                           | Fe           | 4                              | tetrahedral     | 176.31                     | 1.622                          |
| DEQKEQ                           | Fe           | 4                              | tetrahedral     | 179.17                     | 1.635                          |
| FIMPOH                           | Fe           | 4                              | tetrahedral     | 176.33                     | 1.641                          |
| OJAPEU                           | Fe           | 4                              | tetrahedral     | 168.63                     | 1.660                          |
| FIMPIB                           | Fe           | 4                              | tetrahedral     | 178.57                     | 1.651                          |
| FEMPOD                           | Co           | 4                              | tetrahedral     | 168.65                     | 1.675                          |
| WEZFIR                           | Co           | 4                              | tetrahedral     | 179.69                     | 1.659                          |
| LUFQAE                           | Co           | 4                              | tetrahedral     | 169.49                     | 1.658                          |
| NALROI                           | Co           | 4                              | tetrahedral     | 176.68                     | 1.633                          |
| OLAXUU                           | Co           | 4                              | tetrahedral     | 173.15                     | 1.667                          |
| YALHOJ                           | Co           | 4                              | tetrahedral     | 178.34                     | 1.655                          |
| REVKOT                           | Co           | 4                              | tetrahedral     | 179.36                     | 1.660                          |
| QOXBUB                           | Fe           | 4                              | tetrahedral     | 177.74                     | 1.653                          |
| XOMYAA                           | Fe           | 3                              | trigonal        | 156.60                     | 1.642                          |
| XOMYAA                           | Fe           | 3                              | trigonal        | 160.70                     | 1.619                          |
| compound <b>2</b><br>(this work) | Fe           | 3                              | trigonal        | 170.40                     | 1.670                          |
| ABATUT                           | Co           | 3                              | trigonal        | 161.55                     | 1.624                          |
| <sup>a</sup>                     | Co           | 3                              | trigonal        | 172.10                     | 1.621                          |
| JATZEK                           | Ni           | 3                              | trigonal        | 164.49                     | 1.662                          |
| MIQBIX                           | Ni           | 3                              | trigonal        | 162.79                     | 1.702                          |
| SOQJAE                           | Ni           | 3                              | trigonal        | 163.00                     | 1.673                          |
| SOQHOQ                           | Ni           | 3                              | trigonal        | 180.00                     | 1.703                          |

<sup>a</sup> This structure is from: Jones, C.; Schulten, C.; Rose, R. P.; Stasch, A.; Aldridge, S.; Woodul, W. D.; Murray, K. S.; Moubaraki, B.; Brynda, M.; La Macchia, G.; Gagliardi, L. *Angew. Chem. Int. Ed.* **2009**, *48*, 7406 - 7410.

**Table S-7.** ONIOM(B3LYP/6-311+G(d):UFF) Optimized Free Energies (a.u.) for Stationary Points<sup>a</sup>

| <i>Compound</i>                                                         | <i>Multiplicity</i> | <i>Stoichiometry</i>                                             | <i>G</i>    | <i>Comment</i>                                                                            |
|-------------------------------------------------------------------------|---------------------|------------------------------------------------------------------|-------------|-------------------------------------------------------------------------------------------|
| Py                                                                      | 0                   | C <sub>5</sub> H <sub>5</sub> N                                  | -248.28122  | Pyridine                                                                                  |
| AdN <sub>3</sub>                                                        | 0                   | C <sub>10</sub> H <sub>15</sub> N <sub>3</sub>                   | -203.88027  | 1-Adamantyl Azide                                                                         |
| N <sub>2</sub>                                                          | 0                   | N <sub>2</sub>                                                   | -109.57256  | Dinitrogen                                                                                |
| L <sup>Me</sup> Fe(py)(N <sub>3</sub> Ad-κN <sup>1</sup> )              | 4                   | C <sub>44</sub> H <sub>61</sub> FeN <sub>6</sub>                 | -1942.07341 | N <sub>3</sub> Ad coordinated through internal N                                          |
| L <sup>Me</sup> Fe(py)(N <sub>3</sub> Ad-κN <sup>1</sup> )              | 6                   | C <sub>44</sub> H <sub>61</sub> FeN <sub>6</sub>                 | -1942.07513 | N <sub>3</sub> Ad coordinated through internal N                                          |
| L <sup>Me</sup> Fe(py)(N <sub>3</sub> Ad-κN <sup>3</sup> )              | 4                   | C <sub>44</sub> H <sub>61</sub> FeN <sub>6</sub>                 | -1942.08689 | N <sub>3</sub> Ad coordinated through terminal N                                          |
| L <sup>Me</sup> Fe(py)(N <sub>3</sub> Ad-κN <sup>3</sup> )              | 6                   | C <sub>44</sub> H <sub>61</sub> FeN <sub>6</sub>                 | -1942.07585 | N <sub>3</sub> Ad coordinated through terminal N                                          |
| L <sup>Me</sup> Fe(py)(η <sup>2</sup> -N <sub>3</sub> Ad)               | 4                   | C <sub>44</sub> H <sub>61</sub> FeN <sub>6</sub>                 | -1942.08329 | η <sup>2</sup> -N <sub>3</sub> Ad                                                         |
| L <sup>Me</sup> Fe(py)(η <sup>2</sup> -N <sub>3</sub> Ad)               | 6                   | C <sub>44</sub> H <sub>61</sub> FeN <sub>6</sub>                 | <i>n/a</i>  | η <sup>2</sup> -N <sub>3</sub> Ad; reverts to sextet (N <sub>3</sub> Ad-κN <sup>3</sup> ) |
| L <sup>Me</sup> Fe(N <sub>3</sub> Ad-κN <sup>1</sup> )                  | 4                   | C <sub>39</sub> H <sub>56</sub> FeN <sub>5</sub>                 | -1693.81174 | N <sub>3</sub> Ad coordinated through internal N                                          |
| L <sup>Me</sup> Fe(N <sub>3</sub> Ad-κN <sup>1</sup> )                  | 6                   | C <sub>39</sub> H <sub>56</sub> FeN <sub>5</sub>                 | -1693.81243 | N <sub>3</sub> Ad coordinated through internal N                                          |
| L <sup>Me</sup> Fe(N <sub>3</sub> Ad-κN <sup>3</sup> )                  | 4                   | C <sub>39</sub> H <sub>56</sub> FeN <sub>5</sub>                 | -1693.80451 | N <sub>3</sub> Ad coordinated through terminal N                                          |
| L <sup>Me</sup> Fe(N <sub>3</sub> Ad-κN <sup>3</sup> )                  | 6                   | C <sub>39</sub> H <sub>56</sub> FeN <sub>5</sub>                 | -1693.78608 | N <sub>3</sub> Ad coordinated through terminal N                                          |
| L <sup>Me</sup> Fe(η <sup>2</sup> -N <sub>3</sub> Ad)                   | 4                   | C <sub>39</sub> H <sub>56</sub> FeN <sub>5</sub>                 | -1693.80107 | η <sup>2</sup> -N <sub>3</sub> Ad                                                         |
| L <sup>Me</sup> Fe(η <sup>2</sup> -N <sub>3</sub> Ad)                   | 6                   | C <sub>39</sub> H <sub>56</sub> FeN <sub>5</sub>                 | <i>n/a</i>  | η <sup>2</sup> -N <sub>3</sub> Ad; reverts to sextet (N <sub>3</sub> Ad-κN <sup>3</sup> ) |
| L <sup>Me</sup> Fe(N <sub>3</sub> Ad-κN <sup>1</sup> N <sup>3</sup> )   | 4                   | C <sub>39</sub> H <sub>56</sub> FeN <sub>5</sub>                 | -1693.76057 | triazametallocyclobutene core                                                             |
| L <sup>Me</sup> Fe(N <sub>3</sub> Ad-κN <sup>1</sup> N <sup>3</sup> )   | 6                   | C <sub>39</sub> H <sub>56</sub> FeN <sub>5</sub>                 | -1693.74429 | triazametallocyclobutene core                                                             |
| L <sup>Me</sup> Fe(py)                                                  | 4                   | C <sub>34</sub> H <sub>46</sub> FeN <sub>3</sub>                 | -1738.19466 | Pyridine Complex                                                                          |
| L <sup>Me</sup> Fe(py)                                                  | 6                   | C <sub>34</sub> H <sub>46</sub> FeN <sub>3</sub>                 | -1738.14685 | Pyridine Complex                                                                          |
| L <sup>Me</sup> Fe(py) <sub>2</sub>                                     | 4                   | C <sub>39</sub> H <sub>51</sub> FeN <sub>4</sub>                 | -1986.47628 | Bis(pyridine) Complex                                                                     |
| L <sup>Me</sup> Fe(py) <sub>2</sub>                                     | 6                   | C <sub>39</sub> H <sub>51</sub> FeN <sub>4</sub>                 | -1986.45761 | Bis(pyridine) Complex                                                                     |
| L <sup>Me</sup> Fe(NAd)                                                 | 4                   | C <sub>39</sub> H <sub>56</sub> FeN <sub>3</sub>                 | -1584.30802 | Imide                                                                                     |
| L <sup>Me</sup> Fe(NAd)                                                 | 6                   | C <sub>39</sub> H <sub>56</sub> FeN <sub>3</sub>                 | -1584.29124 | Imide                                                                                     |
| L <sup>Me</sup> Fe(py)(NAd)                                             | 4                   | C <sub>44</sub> H <sub>61</sub> FeN <sub>4</sub>                 | -1832.57769 | Imide/Pyridine Adduct                                                                     |
| L <sup>Me</sup> Fe(py)(NAd)                                             | 6                   | C <sub>44</sub> H <sub>61</sub> FeN <sub>4</sub>                 | -1832.57655 | Imide/Pyridine Adduct                                                                     |
| L <sup>Me</sup> Fe(N <sub>3</sub> Ad) - N <sub>2</sub> TS               | 4                   | C <sub>39</sub> H <sub>56</sub> FeN <sub>5</sub>                 | -1693.79334 | TS for N <sub>2</sub> Elimination                                                         |
| L <sup>Me</sup> Fe(N <sub>3</sub> Ad) - N <sub>2</sub> TS               | 6                   | C <sub>39</sub> H <sub>56</sub> FeN <sub>5</sub>                 | -1693.79168 | TS for N <sub>2</sub> Elimination                                                         |
| L <sup>Me</sup> Fe(py)(N <sub>3</sub> Ad) - N <sub>2</sub> TS           | 4                   | C <sub>44</sub> H <sub>61</sub> FeN <sub>6</sub>                 | -1942.07134 | TS for N <sub>2</sub> Elimination                                                         |
| L <sup>Me</sup> Fe(py)(N <sub>3</sub> Ad) - N <sub>2</sub> TS           | 6                   | C <sub>44</sub> H <sub>61</sub> FeN <sub>6</sub>                 | -1942.06997 | TS for N <sub>2</sub> Elimination                                                         |
| L <sup>Me</sup> FeNNFeL <sup>Me</sup>                                   | 7                   | C <sub>58</sub> H <sub>82</sub> Fe <sub>2</sub> N <sub>6</sub>   | -3089.41461 | Diiron Dinitrogen Complex                                                                 |
| L <sup>Me</sup> Fe                                                      | 4                   | C <sub>29</sub> H <sub>41</sub> FeN <sub>2</sub>                 | -1489.87940 | Fe-β-Diketimate Fragment                                                                  |
| L <sup>Me</sup> Fe(N <sub>3</sub> Ad)FeL <sup>Me</sup>                  | 7                   | C <sub>68</sub> H <sub>97</sub> Fe <sub>2</sub> N <sub>7</sub>   | -3183.74110 | L <sup>Me</sup> Fe(μ-N <sub>3</sub> Ad)FeL <sup>Me</sup>                                  |
| L <sup>Me</sup> Fe(N <sub>2</sub> )(N <sub>3</sub> Ad)FeL <sup>Me</sup> | 7                   | C <sub>68</sub> H <sub>97</sub> Fe <sub>2</sub> N <sub>9</sub>   | -3293.28138 | L <sup>Me</sup> Fe(μ-N <sub>2</sub> )(μ-N <sub>3</sub> Ad)FeL <sup>Me</sup>               |
| L <sup>Me</sup> Fe(AdNNNNNAd)FeL <sup>Me</sup>                          | 7                   | C <sub>78</sub> H <sub>112</sub> Fe <sub>2</sub> N <sub>10</sub> | -3387.62685 | L <sup>Me</sup> Fe(μ-AdNNNNNAd)FeL <sup>Me</sup>                                          |

<sup>a</sup> Ad = 1-adamantyl; L<sup>Me</sup> = 2,4-bis(2,6-diisopropylphenylimido)pentyl anion; py = pyridine;  
*n/a* = not available (geometry not stable at the level of theory utilized; see comment)

**Table S-8.** ONIOM(B3LYP/6-311+G(d):UFF) Optimized Cartesian Coordinates (Å) for Stationary Points

**Py** (Pyridine, C<sub>5</sub>H<sub>5</sub>N)

|   |          |           |           |
|---|----------|-----------|-----------|
| C | 0.000000 | -1.141419 | -0.709904 |
| C | 0.000000 | -1.196822 | 0.683008  |
| C | 0.000000 | 0.000000  | 1.394554  |
| C | 0.000000 | 1.196822  | 0.683008  |
| C | 0.000000 | 1.141419  | -0.709904 |
| H | 0.000000 | -2.056251 | -1.297529 |
| H | 0.000000 | -2.154730 | 1.192007  |
| H | 0.000000 | 0.000000  | 2.479920  |
| H | 0.000000 | 2.154730  | 1.192007  |
| H | 0.000000 | 2.056251  | -1.297529 |
| N | 0.000000 | 0.000000  | -1.405553 |

**AdN<sub>3</sub>** (1-Adamantyl Azide, C<sub>10</sub>H<sub>15</sub>N<sub>3</sub>)

|   |           |           |           |
|---|-----------|-----------|-----------|
| N | -0.495411 | -0.689858 | -1.023386 |
| N | -1.442510 | -1.231032 | -1.341788 |
| N | -2.370934 | -1.927005 | -1.737939 |
| C | -3.766129 | -1.457031 | -1.563131 |
| C | -4.003434 | -0.129430 | -2.312450 |
| C | -4.685819 | -2.535247 | -2.153103 |
| C | -4.106171 | -1.268762 | -0.070071 |
| H | -3.754113 | -0.248014 | -3.390304 |
| H | -3.339868 | 0.666155  | -1.907045 |
| C | -5.478697 | 0.306236  | -2.162504 |
| H | -4.522110 | -3.505976 | -1.633787 |
| H | -4.449033 | -2.695583 | -3.228755 |
| C | -6.166197 | -2.114195 | -2.006994 |
| H | -3.444703 | -0.496759 | 0.381706  |
| H | -3.931679 | -2.217081 | 0.485119  |
| C | -5.581710 | -0.836170 | 0.085938  |
| H | -5.640919 | 1.264161  | -2.702757 |
| C | -6.396749 | -0.783958 | -2.756812 |
| C | -5.808105 | 0.495056  | -0.664857 |
| H | -6.821904 | -2.902035 | -2.437328 |
| C | -6.499642 | -1.925018 | -0.511018 |
| H | -5.818061 | -0.700320 | 1.163663  |
| H | -6.179303 | -0.915319 | -3.839647 |
| H | -7.461628 | -0.475642 | -2.667152 |
| H | -5.162811 | 1.290402  | -0.231187 |
| H | -6.864074 | 0.823564  | -0.546326 |
| H | -7.565844 | -1.631380 | -0.392470 |
| H | -6.356799 | -2.883716 | 0.034477  |

**AdN<sub>3</sub><sup>-</sup>** (1-Adamantyl Azide anion, C<sub>10</sub>H<sub>15</sub>N<sub>3</sub><sup>-</sup>)

|   |           |           |           |
|---|-----------|-----------|-----------|
| N | -0.269037 | -1.085337 | -1.213637 |
|---|-----------|-----------|-----------|



|   |           |           |           |
|---|-----------|-----------|-----------|
| N | -1.472988 | -1.042670 | -1.247424 |
| N | -2.365805 | -1.903143 | -1.724886 |
| C | -3.751077 | -1.433774 | -1.550234 |
| C | -4.016868 | -0.100483 | -2.302941 |
| C | -4.668072 | -2.521639 | -2.144725 |
| C | -4.120342 | -1.242865 | -0.052860 |
| H | -3.760078 | -0.213717 | -3.379513 |
| H | -3.371731 | 0.708763  | -1.895404 |
| C | -5.499387 | 0.310450  | -2.161349 |
| H | -4.498386 | -3.490922 | -1.624561 |
| H | -4.425062 | -2.681342 | -3.219116 |
| C | -6.153498 | -2.117982 | -2.008092 |
| H | -3.477651 | -0.460195 | 0.407079  |
| H | -3.938794 | -2.186959 | 0.507046  |
| C | -5.602782 | -0.831032 | 0.086927  |
| H | -5.673542 | 1.265515  | -2.703032 |
| C | -6.396468 | -0.792821 | -2.761220 |
| C | -5.840840 | 0.495807  | -0.666655 |
| H | -6.796476 | -2.914364 | -2.441996 |
| C | -6.499747 | -1.933072 | -0.515375 |
| H | -5.851299 | -0.696907 | 1.162171  |
| H | -6.168932 | -0.922339 | -3.842220 |
| H | -7.466272 | -0.499462 | -2.680212 |
| H | -5.209361 | 1.300155  | -0.229235 |
| H | -6.901855 | 0.810467  | -0.555693 |
| H | -7.570920 | -1.654817 | -0.404623 |
| H | -6.347089 | -2.889275 | 0.031872  |

**N<sub>2</sub>** (dinitrogen, N<sub>2</sub>)

|   |          |          |           |
|---|----------|----------|-----------|
| N | 0.000000 | 0.000000 | 0.547768  |
| N | 0.000000 | 0.000000 | -0.547768 |

**L<sup>Me</sup>Fe(py)(N<sub>3</sub>Ad-κN<sup>1</sup>)** (quartet, C<sub>44</sub>H<sub>61</sub>FeN<sub>6</sub>)

|   |           |           |           |
|---|-----------|-----------|-----------|
| N | 2.405993  | 0.308417  | 0.416228  |
| N | -0.165667 | 1.693550  | 1.017128  |
| C | 2.823322  | 1.122575  | 1.393403  |
| C | 0.665313  | 2.447995  | 1.736465  |
| C | 1.988227  | 2.053601  | 2.045780  |
| H | 2.485349  | 2.672525  | 2.790691  |
| N | -0.561543 | -1.102297 | -1.305574 |
| N | 0.227192  | -1.424276 | -2.402433 |
| N | 1.390861  | -1.279403 | -2.544051 |
| C | -1.983773 | -1.474079 | -1.566789 |
| C | -2.801644 | -1.208949 | -0.293577 |
| C | -2.588130 | -0.627497 | -2.711310 |
| C | -2.117128 | -2.974987 | -1.928848 |
| H | -2.723529 | -0.143348 | -0.015169 |
| H | -2.405600 | -1.806060 | 0.547668  |
| C | -4.287751 | -1.574067 | -0.501813 |

|   |           |           |           |
|---|-----------|-----------|-----------|
| H | -2.017423 | -0.777613 | -3.653820 |
| H | -2.532311 | 0.449764  | -2.452767 |
| C | -4.069098 | -1.002187 | -2.942286 |
| H | -1.690564 | -3.605807 | -1.119442 |
| H | -1.548588 | -3.207740 | -2.855822 |
| C | -3.599703 | -3.349036 | -2.149516 |
| H | -4.854620 | -1.370413 | 0.432812  |
| C | -4.869547 | -0.727157 | -1.652314 |
| C | -4.397859 | -3.071204 | -0.858134 |
| H | -4.482415 | -0.389438 | -3.772723 |
| C | -4.173506 | -2.499325 | -3.303787 |
| H | -3.676697 | -4.427439 | -2.408428 |
| H | -4.816621 | 0.352829  | -1.394098 |
| H | -5.941717 | -0.978828 | -1.807192 |
| H | -4.000209 | -3.690947 | -0.024378 |
| H | -5.464546 | -3.351636 | -1.001362 |
| H | -5.235961 | -2.773332 | -3.485808 |
| H | -3.612641 | -2.703494 | -4.242300 |
| C | 3.344466  | -0.285403 | -0.475374 |
| C | 3.755582  | -1.635084 | -0.291646 |
| C | 3.916713  | 0.487164  | -1.526908 |
| C | 4.703765  | -2.188873 | -1.171584 |
| C | 4.871947  | -0.107389 | -2.371806 |
| C | 5.253120  | -1.431708 | -2.198313 |
| H | 5.034556  | -3.212657 | -1.056652 |
| H | 5.328513  | 0.456198  | -3.174670 |
| H | 5.987187  | -1.872803 | -2.860421 |
| C | -1.458677 | 2.158783  | 0.661224  |
| C | -1.664891 | 2.762456  | -0.608103 |
| C | -2.553692 | 1.998534  | 1.559374  |
| C | -2.970842 | 3.127321  | -0.984158 |
| C | -3.843387 | 2.359331  | 1.128727  |
| C | -4.047318 | 2.907535  | -0.132315 |
| H | -3.160885 | 3.602974  | -1.937022 |
| H | -4.699825 | 2.229296  | 1.776986  |
| H | -5.045500 | 3.189209  | -0.442020 |
| C | 0.270795  | 3.810261  | 2.291966  |
| H | -0.738183 | 4.146418  | 1.984894  |
| H | 0.297932  | 3.780889  | 3.401786  |
| H | 0.990383  | 4.577827  | 1.935718  |
| C | 4.262458  | 1.115228  | 1.891783  |
| H | 4.912135  | 0.388979  | 1.366213  |
| H | 4.709473  | 2.123820  | 1.768637  |
| H | 4.276897  | 0.850187  | 2.970260  |
| C | -2.366831 | 1.481070  | 2.983292  |
| C | -3.091315 | 0.147946  | 3.202705  |
| C | -2.824893 | 2.520244  | 4.016199  |
| H | -1.297000 | 1.296956  | 3.190068  |
| H | -2.685206 | -0.620867 | 2.518773  |
| H | -2.927254 | -0.208498 | 4.242123  |
| H | -4.183661 | 0.246097  | 3.030591  |

|    |           |           |           |
|----|-----------|-----------|-----------|
| H  | -2.326828 | 3.494744  | 3.830305  |
| H  | -3.924670 | 2.668404  | 3.979506  |
| H  | -2.552073 | 2.183767  | 5.039314  |
| C  | -0.496461 | 3.123423  | -1.521666 |
| C  | -0.357332 | 4.646297  | -1.638508 |
| C  | -0.622395 | 2.478984  | -2.909041 |
| H  | 0.456916  | 2.757379  | -1.093483 |
| H  | -0.278814 | 5.100303  | -0.627424 |
| H  | 0.564755  | 4.902908  | -2.202854 |
| H  | -1.229056 | 5.088571  | -2.165725 |
| H  | -0.451825 | 1.386685  | -2.830397 |
| H  | -1.615165 | 2.665896  | -3.366585 |
| H  | 0.143781  | 2.888693  | -3.598530 |
| C  | 3.228784  | -2.488156 | 0.852323  |
| C  | 4.355953  | -2.902711 | 1.806646  |
| C  | 2.480965  | -3.718582 | 0.322493  |
| H  | 2.514927  | -1.906521 | 1.460886  |
| H  | 4.894280  | -2.004316 | 2.175742  |
| H  | 3.931494  | -3.434832 | 2.684847  |
| H  | 5.082589  | -3.576664 | 1.306072  |
| H  | 1.670242  | -3.403132 | -0.368165 |
| H  | 3.164497  | -4.404472 | -0.220345 |
| H  | 2.026511  | -4.280449 | 1.165808  |
| C  | 3.526913  | 1.941516  | -1.766287 |
| C  | 2.943741  | 2.135383  | -3.170900 |
| C  | 4.720698  | 2.878317  | -1.543431 |
| H  | 2.739706  | 2.256051  | -1.054384 |
| H  | 2.114236  | 1.417689  | -3.340022 |
| H  | 2.548109  | 3.167982  | -3.275251 |
| H  | 3.713135  | 1.979265  | -3.955755 |
| H  | 5.152482  | 2.716927  | -0.534490 |
| H  | 5.514386  | 2.706064  | -2.300813 |
| H  | 4.390531  | 3.936798  | -1.613784 |
| Fe | 0.407409  | -0.125200 | 0.195415  |
| N  | 0.083873  | -1.451989 | 1.961887  |
| C  | 0.373260  | -0.952865 | 3.176239  |
| C  | -0.308153 | -2.734410 | 1.889706  |
| C  | 0.250294  | -1.694222 | 4.345113  |
| H  | 0.728422  | 0.070380  | 3.199639  |
| C  | -0.462942 | -3.544398 | 3.007606  |
| H  | -0.488025 | -3.117233 | 0.892819  |
| C  | -0.184864 | -3.013352 | 4.263312  |
| H  | 0.495099  | -1.238105 | 5.297383  |
| H  | -0.787715 | -4.571250 | 2.886160  |
| H  | -0.296090 | -3.617338 | 5.157650  |

**L<sup>Me</sup>Fe(py)(N<sub>3</sub>Ad-κN<sup>1</sup>)** (sextet, C<sub>44</sub>H<sub>61</sub>FeN<sub>6</sub>)

|   |           |          |          |
|---|-----------|----------|----------|
| N | 2.421433  | 0.284067 | 0.412839 |
| N | -0.137841 | 1.681009 | 1.028851 |
| C | 2.844081  | 1.082343 | 1.401480 |

|   |           |           |           |
|---|-----------|-----------|-----------|
| C | 0.698175  | 2.422728  | 1.754286  |
| C | 2.017642  | 2.014076  | 2.061805  |
| H | 2.518915  | 2.620921  | 2.813850  |
| N | -0.612110 | -1.081383 | -1.306697 |
| N | 0.174837  | -1.388623 | -2.398083 |
| N | 1.339230  | -1.214030 | -2.520667 |
| C | -2.036264 | -1.442656 | -1.561323 |
| C | -2.842248 | -1.196721 | -0.276959 |
| C | -2.644478 | -0.573034 | -2.685948 |
| C | -2.178819 | -2.935956 | -1.949256 |
| H | -2.756519 | -0.136542 | 0.020191  |
| H | -2.442508 | -1.811266 | 0.550358  |
| C | -4.331673 | -1.550901 | -0.480347 |
| H | -2.081430 | -0.710406 | -3.635039 |
| H | -2.579821 | 0.499531  | -2.409781 |
| C | -4.129051 | -0.936043 | -2.911900 |
| H | -1.749178 | -3.583090 | -1.154398 |
| H | -1.617998 | -3.154020 | -2.884507 |
| C | -3.664883 | -3.299098 | -2.165227 |
| H | -4.890416 | -1.361545 | 0.462134  |
| C | -4.918019 | -0.680444 | -1.610860 |
| C | -4.451834 | -3.040853 | -0.862890 |
| H | -4.545693 | -0.306410 | -3.727915 |
| C | -4.243623 | -2.425957 | -3.299438 |
| H | -3.749013 | -4.372273 | -2.442941 |
| H | -4.857602 | 0.394425  | -1.333584 |
| H | -5.992617 | -0.923983 | -1.761847 |
| H | -4.050923 | -3.677515 | -0.043576 |
| H | -5.520949 | -3.313538 | -1.002945 |
| H | -5.308801 | -2.691586 | -3.477927 |
| H | -3.691150 | -2.615854 | -4.245891 |
| C | 3.356345  | -0.300746 | -0.487738 |
| C | 3.758119  | -1.655998 | -0.326533 |
| C | 3.930163  | 0.484222  | -1.528993 |
| C | 4.700455  | -2.202192 | -1.217394 |
| C | 4.879331  | -0.103205 | -2.385555 |
| C | 5.252468  | -1.432528 | -2.233476 |
| H | 5.024123  | -3.230041 | -1.119705 |
| H | 5.336821  | 0.469750  | -3.181247 |
| H | 5.981814  | -1.868079 | -2.904412 |
| C | -1.430015 | 2.156327  | 0.683166  |
| C | -1.639658 | 2.767841  | -0.581872 |
| C | -2.520164 | 2.001688  | 1.588385  |
| C | -2.944286 | 3.149714  | -0.945446 |
| C | -3.809221 | 2.377995  | 1.169174  |
| C | -4.016617 | 2.936281  | -0.086844 |
| H | -3.136455 | 3.633343  | -1.893825 |
| H | -4.662329 | 2.252377  | 1.822669  |
| H | -5.014026 | 3.230379  | -0.387354 |
| C | 0.316093  | 3.784921  | 2.318726  |
| H | -0.688726 | 4.133449  | 2.011733  |

|    |           |           |           |
|----|-----------|-----------|-----------|
| H  | 0.340868  | 3.747467  | 3.428348  |
| H  | 1.044061  | 4.547720  | 1.969330  |
| C  | 4.281859  | 1.054031  | 1.902901  |
| H  | 4.924229  | 0.325323  | 1.371823  |
| H  | 4.740548  | 2.058579  | 1.789926  |
| H  | 4.290999  | 0.778649  | 2.978848  |
| C  | -2.328915 | 1.472633  | 3.007590  |
| C  | -3.062296 | 0.143523  | 3.221698  |
| C  | -2.772894 | 2.507761  | 4.050733  |
| H  | -1.259460 | 1.278428  | 3.206889  |
| H  | -2.662543 | -0.624610 | 2.533185  |
| H  | -2.898705 | -0.219473 | 4.258919  |
| H  | -4.154259 | 0.250121  | 3.052161  |
| H  | -2.270481 | 3.480517  | 3.867530  |
| H  | -3.872001 | 2.662715  | 4.023420  |
| H  | -2.494454 | 2.162875  | 5.069524  |
| C  | -0.474438 | 3.119810  | -1.503064 |
| C  | -0.314321 | 4.641457  | -1.607498 |
| C  | -0.622120 | 2.490146  | -2.895173 |
| H  | 0.477170  | 2.735478  | -1.087094 |
| H  | -0.218099 | 5.084796  | -0.593227 |
| H  | 0.605091  | 4.890069  | -2.179675 |
| H  | -1.185391 | 5.101105  | -2.120778 |
| H  | -0.476134 | 1.393785  | -2.827065 |
| H  | -1.612757 | 2.703159  | -3.345809 |
| H  | 0.149761  | 2.888470  | -3.585077 |
| C  | 3.226292  | -2.523809 | 0.804117  |
| C  | 4.351735  | -2.964691 | 1.748648  |
| C  | 2.466348  | -3.738253 | 0.255106  |
| H  | 2.518761  | -1.946492 | 1.424297  |
| H  | 4.899065  | -2.077670 | 2.131695  |
| H  | 3.924351  | -3.507759 | 2.618690  |
| H  | 5.071086  | -3.636665 | 1.235072  |
| H  | 1.656904  | -3.403814 | -0.428071 |
| H  | 3.142606  | -4.420688 | -0.301065 |
| H  | 2.008592  | -4.310307 | 1.089770  |
| C  | 3.547005  | 1.943943  | -1.745886 |
| C  | 2.959075  | 2.160813  | -3.145157 |
| C  | 4.746300  | 2.871352  | -1.513886 |
| H  | 2.764227  | 2.252474  | -1.026507 |
| H  | 2.127516  | 1.447445  | -3.322188 |
| H  | 2.564488  | 3.195454  | -3.232098 |
| H  | 3.725364  | 2.015157  | -3.935074 |
| H  | 5.179852  | 2.693908  | -0.508315 |
| H  | 5.536933  | 2.705261  | -2.275816 |
| H  | 4.421497  | 3.932398  | -1.568906 |
| Fe | 0.423743  | -0.127312 | 0.168661  |
| N  | 0.090758  | -1.469943 | 1.934778  |
| C  | 0.387874  | -0.993750 | 3.156054  |
| C  | -0.312416 | -2.747223 | 1.842231  |
| C  | 0.262991  | -1.753920 | 4.312830  |

|   |           |           |          |
|---|-----------|-----------|----------|
| H | 0.750958  | 0.026186  | 3.195322 |
| C | -0.470010 | -3.575252 | 2.946521 |
| H | -0.499718 | -3.110393 | 0.839246 |
| C | -0.182892 | -3.067980 | 4.210066 |
| H | 0.514469  | -1.316144 | 5.271976 |
| H | -0.803791 | -4.597196 | 2.808906 |
| H | -0.295771 | -3.686291 | 5.094382 |

**L<sup>Me</sup>Fe(py)(N<sub>3</sub>Ad-κN<sup>3</sup>)** (quartet, C<sub>44</sub>H<sub>61</sub>FeN<sub>6</sub>)

|   |           |           |           |
|---|-----------|-----------|-----------|
| N | 0.506340  | -0.936219 | 1.669286  |
| N | 2.970462  | -0.120254 | 0.173724  |
| C | 1.433308  | -1.295364 | 2.561646  |
| C | 3.539820  | -0.497557 | 1.324805  |
| C | 2.803709  | -0.953170 | 2.440562  |
| H | 3.410812  | -1.211593 | 3.306469  |
| N | -0.035099 | 0.217759  | -1.574277 |
| N | -1.251180 | 0.263180  | -1.658245 |
| N | -2.117369 | 0.069179  | -2.558780 |
| C | 5.048009  | -0.470886 | 1.526186  |
| H | 5.296258  | 0.194934  | 2.379790  |
| H | 5.412330  | -1.495190 | 1.752466  |
| H | 5.607406  | -0.099340 | 0.645640  |
| C | 1.103316  | -2.122227 | 3.797460  |
| H | 1.709566  | -3.052903 | 3.793779  |
| H | 1.348454  | -1.539257 | 4.710378  |
| H | 0.040817  | -2.424496 | 3.867454  |
| C | -0.826946 | -1.423116 | 1.747974  |
| C | -1.189929 | -2.602000 | 1.045052  |
| C | -1.786854 | -0.763044 | 2.564171  |
| C | -2.468301 | -3.153751 | 1.251132  |
| C | -3.068705 | -1.325884 | 2.703830  |
| C | -3.395371 | -2.519361 | 2.070365  |
| H | -2.758795 | -4.076971 | 0.768391  |
| H | -3.822050 | -0.843278 | 3.312313  |
| H | -4.381045 | -2.947022 | 2.201269  |
| C | 3.730979  | 0.041834  | -1.013892 |
| C | 4.164118  | 1.335079  | -1.411660 |
| C | 4.052168  | -1.089583 | -1.811488 |
| C | 4.898180  | 1.474018  | -2.603445 |
| C | 4.799785  | -0.904362 | -2.989140 |
| C | 5.211991  | 0.364650  | -3.380577 |
| H | 5.238375  | 2.446947  | -2.933128 |
| H | 5.066485  | -1.746785 | -3.613633 |
| H | 5.782945  | 0.488868  | -4.291819 |
| C | 3.615387  | -2.497188 | -1.420823 |
| C | 4.827642  | -3.395568 | -1.147152 |
| C | 2.708936  | -3.112450 | -2.492812 |
| H | 3.022806  | -2.478721 | -0.484719 |
| H | 5.481869  | -2.929801 | -0.380200 |
| H | 4.490066  | -4.381455 | -0.761822 |

|   |           |           |           |
|---|-----------|-----------|-----------|
| H | 5.421479  | -3.563354 | -2.070336 |
| H | 1.836436  | -2.449468 | -2.676136 |
| H | 3.253673  | -3.261156 | -3.448568 |
| H | 2.335983  | -4.100551 | -2.149468 |
| C | 3.874756  | 2.569384  | -0.568851 |
| C | 3.004558  | 3.571453  | -1.337215 |
| C | 5.170019  | 3.228491  | -0.078747 |
| H | 3.314659  | 2.286425  | 0.340767  |
| H | 2.096896  | 3.065686  | -1.729546 |
| H | 2.682185  | 4.391462  | -0.660299 |
| H | 3.560348  | 4.015786  | -2.189683 |
| H | 5.789534  | 2.488771  | 0.471499  |
| H | 5.762668  | 3.634689  | -0.925236 |
| H | 4.931160  | 4.063117  | 0.614649  |
| C | -0.219617 | -3.293252 | 0.095648  |
| C | -0.841659 | -3.502947 | -1.293564 |
| C | 0.262696  | -4.621977 | 0.685573  |
| H | 0.678417  | -2.661545 | -0.059735 |
| H | -1.193575 | -2.535157 | -1.705142 |
| H | -0.089637 | -3.922592 | -1.991936 |
| H | -1.696557 | -4.209200 | -1.257641 |
| H | 0.729487  | -4.449076 | 1.678616  |
| H | -0.580831 | -5.334890 | 0.804044  |
| H | 1.025557  | -5.079676 | 0.020149  |
| C | -1.468126 | 0.541705  | 3.280167  |
| C | -1.624363 | 0.406253  | 4.800271  |
| C | -2.335784 | 1.685100  | 2.739374  |
| H | -0.414573 | 0.825761  | 3.103780  |
| H | -1.010699 | -0.439497 | 5.175037  |
| H | -1.274832 | 1.334905  | 5.300037  |
| H | -2.683472 | 0.234074  | 5.085121  |
| H | -2.247119 | 1.740867  | 1.634070  |
| H | -3.404596 | 1.536641  | 3.001623  |
| H | -1.998060 | 2.653748  | 3.165663  |
| C | -3.515916 | 0.265681  | -2.106882 |
| C | -3.765257 | 1.724464  | -1.658407 |
| C | -4.433169 | -0.051261 | -3.297999 |
| C | -3.865377 | -0.686737 | -0.941547 |
| H | -3.513631 | 2.426757  | -2.483742 |
| H | -3.110511 | 1.982329  | -0.797458 |
| C | -5.242374 | 1.909421  | -1.245582 |
| H | -4.265024 | -1.095857 | -3.643439 |
| H | -4.195031 | 0.618922  | -4.154011 |
| C | -5.915807 | 0.128314  | -2.897418 |
| H | -3.213031 | -0.472467 | -0.068559 |
| H | -3.683574 | -1.742844 | -1.240190 |
| C | -5.341618 | -0.507341 | -0.527124 |
| H | -5.409740 | 2.960063  | -0.923178 |
| C | -6.153269 | 1.586951  | -2.449701 |
| C | -5.572728 | 0.952267  | -0.078649 |
| H | -6.567238 | -0.103886 | -3.767773 |

|    |           |           |           |
|----|-----------|-----------|-----------|
| C  | -6.251894 | -0.827301 | -1.731926 |
| H  | -5.579225 | -1.196172 | 0.312314  |
| H  | -5.934155 | 2.282745  | -3.289298 |
| H  | -7.219948 | 1.730571  | -2.169333 |
| H  | -4.930318 | 1.185807  | 0.798815  |
| H  | -6.629822 | 1.089616  | 0.238341  |
| H  | -7.319891 | -0.714772 | -1.442595 |
| H  | -6.103510 | -1.882574 | -2.050515 |
| Fe | 0.982347  | 0.155263  | 0.030796  |
| N  | 0.582613  | 2.204590  | 0.724879  |
| C  | 1.133644  | 2.632643  | 1.874509  |
| C  | -0.207679 | 3.054123  | 0.049209  |
| C  | 0.915278  | 3.904570  | 2.386768  |
| H  | 1.767350  | 1.920435  | 2.392952  |
| C  | -0.482492 | 4.341982  | 0.493877  |
| H  | -0.623464 | 2.676261  | -0.876490 |
| C  | 0.088308  | 4.778260  | 1.685297  |
| H  | 1.384860  | 4.196686  | 3.318916  |
| H  | -1.131007 | 4.984374  | -0.090635 |
| H  | -0.105553 | 5.777907  | 2.059486  |

**L<sup>Me</sup>Fe(py)(N<sub>3</sub>Ad-κN<sup>3</sup>)** (sextet, C<sub>44</sub>H<sub>61</sub>FeN<sub>6</sub>)

|   |           |           |           |
|---|-----------|-----------|-----------|
| N | 0.551531  | -0.329982 | 1.977490  |
| N | 2.935376  | -0.535941 | 0.201655  |
| C | 1.471755  | -0.619841 | 2.906017  |
| C | 3.492496  | -0.917944 | 1.355380  |
| C | 2.834922  | -0.819783 | 2.605002  |
| H | 3.459919  | -1.052471 | 3.465172  |
| N | -0.212389 | -0.129365 | -1.411214 |
| N | -1.439848 | -0.058844 | -1.435794 |
| N | -2.252378 | 0.352714  | -2.321010 |
| C | 4.890113  | -1.517544 | 1.430797  |
| H | 5.538897  | -0.870368 | 2.058076  |
| H | 4.836244  | -2.525213 | 1.895007  |
| H | 5.382664  | -1.638604 | 0.446938  |
| C | 1.115399  | -0.770757 | 4.377794  |
| H | 1.365462  | -1.797685 | 4.718483  |
| H | 1.699999  | -0.041344 | 4.977617  |
| H | 0.044578  | -0.592978 | 4.596807  |
| C | -0.836736 | -0.438132 | 2.252565  |
| C | -1.482059 | -1.699941 | 2.157600  |
| C | -1.579692 | 0.711731  | 2.629980  |
| C | -2.850210 | -1.791816 | 2.473233  |
| C | -2.943671 | 0.571696  | 2.944162  |
| C | -3.567265 | -0.668785 | 2.871795  |
| H | -3.368929 | -2.739627 | 2.416175  |
| H | -3.534338 | 1.428603  | 3.240126  |
| H | -4.618239 | -0.758071 | 3.114885  |
| C | 3.577756  | -0.761938 | -1.043829 |
| C | 4.548762  | 0.157028  | -1.528688 |



|   |           |           |           |
|---|-----------|-----------|-----------|
| C | 3.266568  | -1.926277 | -1.793564 |
| C | 5.228963  | -0.138481 | -2.724132 |
| C | 3.998195  | -2.199227 | -2.963952 |
| C | 4.965616  | -1.311678 | -3.422973 |
| H | 5.976042  | 0.538386  | -3.117324 |
| H | 3.818926  | -3.102164 | -3.531970 |
| H | 5.510140  | -1.530999 | -4.332464 |
| C | 2.181262  | -2.896616 | -1.341649 |
| C | 2.799805  | -4.198239 | -0.823132 |
| C | 1.168894  | -3.179014 | -2.462608 |
| H | 1.600596  | -2.457764 | -0.504885 |
| H | 3.503777  | -3.979133 | 0.007748  |
| H | 2.004287  | -4.869551 | -0.434621 |
| H | 3.350331  | -4.726479 | -1.630510 |
| H | 0.777599  | -2.226592 | -2.877373 |
| H | 1.626114  | -3.765915 | -3.286105 |
| H | 0.313253  | -3.763422 | -2.066282 |
| C | 4.865522  | 1.453896  | -0.793090 |
| C | 4.518163  | 2.673253  | -1.657290 |
| C | 6.333596  | 1.504113  | -0.349887 |
| H | 4.256544  | 1.532727  | 0.129151  |
| H | 3.467413  | 2.606021  | -2.009308 |
| H | 4.627283  | 3.604761  | -1.061865 |
| H | 5.184749  | 2.742556  | -2.542673 |
| H | 6.584339  | 0.608977  | 0.255742  |
| H | 7.018067  | 1.546486  | -1.223096 |
| H | 6.509052  | 2.404815  | 0.276390  |
| C | -0.727215 | -2.955298 | 1.734008  |
| C | -1.310100 | -3.543162 | 0.443936  |
| C | -0.716418 | -3.999320 | 2.856989  |
| H | 0.333855  | -2.720210 | 1.516613  |
| H | -1.284378 | -2.781287 | -0.363020 |
| H | -0.705081 | -4.415902 | 0.118389  |
| H | -2.358393 | -3.879089 | 0.587931  |
| H | -0.306479 | -3.553162 | 3.787764  |
| H | -1.738669 | -4.381326 | 3.062061  |
| H | -0.071173 | -4.857417 | 2.571123  |
| C | -0.934772 | 2.088162  | 2.708694  |
| C | -0.993335 | 2.653276  | 4.133022  |
| C | -1.579597 | 3.053601  | 1.705950  |
| H | 0.138415  | 2.023258  | 2.447252  |
| H | -0.527547 | 1.939721  | 4.845459  |
| H | -0.430446 | 3.609785  | 4.184075  |
| H | -2.040187 | 2.845284  | 4.449208  |
| H | -1.564757 | 2.610588  | 0.687820  |
| H | -2.632384 | 3.275780  | 1.980408  |
| H | -1.012558 | 4.008553  | 1.678483  |
| C | -3.681819 | 0.209739  | -1.968446 |
| C | -4.021509 | 0.959462  | -0.660075 |
| C | -4.498689 | 0.823535  | -3.116777 |
| C | -4.073890 | -1.277194 | -1.814637 |

|    |           |           |           |
|----|-----------|-----------|-----------|
| H  | -3.740118 | 2.032182  | -0.748606 |
| H  | -3.438213 | 0.536485  | 0.184100  |
| C  | -5.530089 | 0.837974  | -0.351439 |
| H  | -4.265422 | 0.304512  | -4.073308 |
| H  | -4.226167 | 1.894300  | -3.250907 |
| C  | -6.011800 | 0.708845  | -2.822434 |
| H  | -3.496258 | -1.744520 | -0.987218 |
| H  | -3.828137 | -1.836168 | -2.744632 |
| C  | -5.584102 | -1.401741 | -1.513337 |
| H  | -5.760389 | 1.376179  | 0.593712  |
| C  | -6.338229 | 1.457729  | -1.511633 |
| C  | -5.907599 | -0.652740 | -0.202443 |
| H  | -6.589035 | 1.157196  | -3.660046 |
| C  | -6.391779 | -0.780087 | -2.672761 |
| H  | -5.854495 | -2.474564 | -1.404809 |
| H  | -6.086482 | 2.535980  | -1.616924 |
| H  | -7.427196 | 1.390689  | -1.295600 |
| H  | -5.344228 | -1.107559 | 0.639941  |
| H  | -6.990094 | -0.748999 | 0.033746  |
| H  | -7.481551 | -0.876810 | -2.472532 |
| H  | -6.178524 | -1.324104 | -3.619138 |
| Fe | 1.043059  | 0.145173  | 0.092834  |
| N  | 1.220851  | 2.306465  | -0.186471 |
| C  | 0.610185  | 2.904681  | -1.225036 |
| C  | 1.932315  | 3.070169  | 0.660686  |
| C  | 0.689701  | 4.274683  | -1.448373 |
| H  | 0.043530  | 2.251844  | -1.879750 |
| C  | 2.056431  | 4.444442  | 0.511196  |
| H  | 2.412177  | 2.551147  | 1.483737  |
| C  | 1.423337  | 5.060668  | -0.565719 |
| H  | 0.178171  | 4.707634  | -2.300020 |
| H  | 2.640098  | 5.013589  | 1.225337  |
| H  | 1.500705  | 6.132848  | -0.712181 |

**L<sup>Me</sup>Fe(py)( $\eta^2$ -N<sub>3</sub>Ad)** (sextet, C<sub>44</sub>H<sub>61</sub>FeN<sub>6</sub>)

|   |           |           |           |
|---|-----------|-----------|-----------|
| N | -0.504671 | 1.925344  | -0.862327 |
| N | -2.612545 | -0.158224 | -0.618474 |
| C | -1.531818 | 2.613811  | -1.371294 |
| C | -3.303242 | 0.767048  | -1.290359 |
| C | -2.834842 | 2.086931  | -1.492834 |
| H | -3.560722 | 2.763723  | -1.939627 |
| N | 0.318865  | -1.370258 | 0.538065  |
| N | 1.095607  | -0.428838 | 0.296622  |
| N | 2.301494  | -0.068121 | 0.222818  |
| C | -4.655726 | 0.479628  | -1.927643 |
| H | -5.428259 | 1.133537  | -1.470802 |
| H | -4.605279 | 0.694945  | -3.016189 |
| H | -4.990580 | -0.569961 | -1.820527 |
| C | -1.372373 | 4.038164  | -1.882717 |
| H | -1.626850 | 4.076832  | -2.963010 |

|   |           |           |           |
|---|-----------|-----------|-----------|
| H | -2.059757 | 4.710848  | -1.327188 |
| H | -0.348599 | 4.442360  | -1.761956 |
| C | 0.837069  | 2.351170  | -1.050827 |
| C | 1.528655  | 2.000736  | -2.241587 |
| C | 1.506023  | 3.082648  | -0.032367 |
| C | 2.873470  | 2.387452  | -2.389252 |
| C | 2.854780  | 3.436241  | -0.218186 |
| C | 3.528171  | 3.090560  | -1.384262 |
| H | 3.425813  | 2.138283  | -3.285606 |
| H | 3.392578  | 3.985309  | 0.543475  |
| H | 4.565710  | 3.371721  | -1.511117 |
| C | -3.072482 | -1.497976 | -0.511107 |
| C | -4.042181 | -1.851853 | 0.469021  |
| C | -2.580554 | -2.482951 | -1.407867 |
| C | -4.526997 | -3.171897 | 0.502858  |
| C | -3.128546 | -3.778402 | -1.365529 |
| C | -4.085093 | -4.117593 | -0.415250 |
| H | -5.261832 | -3.472721 | 1.237981  |
| H | -2.814194 | -4.537528 | -2.068791 |
| H | -4.484161 | -5.123460 | -0.387290 |
| C | -1.508611 | -2.154629 | -2.441087 |
| C | -2.121064 | -2.070710 | -3.842401 |
| C | -0.353349 | -3.168605 | -2.408532 |
| H | -1.058231 | -1.164594 | -2.222313 |
| H | -2.925962 | -1.305352 | -3.859430 |
| H | -1.346449 | -1.774056 | -4.581093 |
| H | -2.549466 | -3.049107 | -4.147871 |
| H | 0.031273  | -3.282654 | -1.374097 |
| H | -0.673012 | -4.163538 | -2.781689 |
| H | 0.479718  | -2.822065 | -3.053478 |
| C | -4.563731 | -0.845157 | 1.487489  |
| C | -4.181683 | -1.261511 | 2.913622  |
| C | -6.081819 | -0.654769 | 1.367189  |
| H | -4.110978 | 0.148992  | 1.311434  |
| H | -3.090598 | -1.454088 | 2.976552  |
| H | -4.434716 | -0.449033 | 3.627826  |
| H | -4.720737 | -2.182280 | 3.221592  |
| H | -6.356521 | -0.387252 | 0.326192  |
| H | -6.629363 | -1.577269 | 1.653300  |
| H | -6.413262 | 0.169242  | 2.034621  |
| C | 0.853410  | 1.212099  | -3.358269 |
| C | 1.568699  | -0.120753 | -3.602909 |
| C | 0.775289  | 2.038386  | -4.647219 |
| H | -0.190725 | 0.958234  | -3.085851 |
| H | 1.612110  | -0.699344 | -2.657424 |
| H | 1.011302  | -0.718410 | -4.354740 |
| H | 2.602239  | 0.033721  | -3.977188 |
| H | 0.261770  | 3.003280  | -4.449630 |
| H | 1.787288  | 2.247081  | -5.053895 |
| H | 0.193249  | 1.487403  | -5.416648 |
| C | 0.799806  | 3.496465  | 1.250687  |

|    |           |           |           |
|----|-----------|-----------|-----------|
| C  | 0.756832  | 5.022452  | 1.398113  |
| C  | 1.452726  | 2.844873  | 2.476499  |
| H  | -0.253479 | 3.163281  | 1.228664  |
| H  | 0.286466  | 5.479344  | 0.501679  |
| H  | 0.149524  | 5.299918  | 2.286154  |
| H  | 1.775603  | 5.445501  | 1.524220  |
| H  | 1.520552  | 1.745873  | 2.335949  |
| H  | 2.474854  | 3.243581  | 2.647414  |
| H  | 0.840620  | 3.042252  | 3.382435  |
| C  | 3.356051  | -1.062668 | 0.521717  |
| C  | 3.304576  | -2.269595 | -0.443620 |
| C  | 4.698972  | -0.337971 | 0.337406  |
| C  | 3.258781  | -1.571091 | 1.978683  |
| H  | 3.373524  | -1.920091 | -1.496874 |
| H  | 2.343380  | -2.816194 | -0.339992 |
| C  | 4.470367  | -3.238189 | -0.143210 |
| H  | 4.755385  | 0.543481  | 1.015086  |
| H  | 4.787003  | 0.046554  | -0.703711 |
| C  | 5.874080  | -1.295456 | 0.635880  |
| H  | 2.296189  | -2.100147 | 2.146553  |
| H  | 3.287709  | -0.712060 | 2.685386  |
| C  | 4.425152  | -2.538014 | 2.281675  |
| H  | 4.423434  | -4.103724 | -0.839289 |
| C  | 5.812229  | -2.498039 | -0.330277 |
| C  | 4.358677  | -3.740213 | 1.313596  |
| H  | 6.837025  | -0.757268 | 0.498410  |
| C  | 5.766839  | -1.798367 | 2.091569  |
| H  | 4.345687  | -2.899844 | 3.329817  |
| H  | 5.909443  | -2.146794 | -1.381154 |
| H  | 6.659903  | -3.190176 | -0.131755 |
| H  | 3.401344  | -4.288785 | 1.454008  |
| H  | 5.184170  | -4.452068 | 1.534537  |
| H  | 6.614069  | -2.481077 | 2.322073  |
| H  | 5.830894  | -0.940027 | 2.796036  |
| Fe | -0.741605 | 0.152401  | 0.026933  |
| N  | -1.254203 | 0.693876  | 2.153248  |
| C  | -2.131327 | 1.675783  | 2.413481  |
| C  | -0.684750 | 0.063211  | 3.191333  |
| C  | -2.463810 | 2.067980  | 3.704459  |
| H  | -2.576332 | 2.158761  | 1.549632  |
| C  | -0.960170 | 0.390901  | 4.514198  |
| H  | 0.005255  | -0.732435 | 2.934023  |
| C  | -1.865510 | 1.414286  | 4.777956  |
| H  | -3.178021 | 2.868880  | 3.857469  |
| H  | -0.471050 | -0.150360 | 5.315985  |
| H  | -2.101892 | 1.695485  | 5.798852  |

**L<sup>Me</sup>Fe(N<sub>3</sub>Ad-κN<sup>1</sup>)** (quartet, C<sub>39</sub>H<sub>56</sub>FeN<sub>5</sub>)

|   |           |           |          |
|---|-----------|-----------|----------|
| N | -2.244364 | -0.449847 | 0.727391 |
| N | 0.217268  | -1.886008 | 0.591072 |

|    |           |           |           |
|----|-----------|-----------|-----------|
| C  | -2.660562 | -1.538913 | 1.397043  |
| C  | -0.551103 | -2.902129 | 1.027960  |
| C  | -1.847989 | -2.681591 | 1.531916  |
| H  | -2.312220 | -3.531707 | 2.026974  |
| N  | 0.354791  | 1.607689  | -0.612128 |
| N  | -0.404038 | 2.308096  | -1.549973 |
| N  | -1.542433 | 2.151891  | -1.814266 |
| Fe | -0.396553 | -0.028621 | 0.152802  |
| C  | 1.740899  | 2.117724  | -0.509062 |
| C  | 2.377973  | 1.465873  | 0.724649  |
| C  | 2.569426  | 1.738089  | -1.755216 |
| C  | 1.777685  | 3.653410  | -0.322508 |
| H  | 2.358779  | 0.365289  | 0.608215  |
| H  | 1.790134  | 1.715327  | 1.636348  |
| C  | 3.839450  | 1.936292  | 0.899477  |
| H  | 2.123161  | 2.190584  | -2.667974 |
| H  | 2.564413  | 0.635517  | -1.895154 |
| C  | 4.028279  | 2.220980  | -1.596386 |
| H  | 1.186027  | 3.945687  | 0.572663  |
| H  | 1.324738  | 4.167130  | -1.198710 |
| C  | 3.235876  | 4.138437  | -0.160616 |
| H  | 4.285008  | 1.450768  | 1.794309  |
| C  | 4.654214  | 1.551754  | -0.353868 |
| C  | 3.863550  | 3.468332  | 1.079691  |
| H  | 4.612146  | 1.944229  | -2.500992 |
| C  | 4.046013  | 3.754967  | -1.418610 |
| H  | 3.248862  | 5.242656  | -0.032459 |
| H  | 4.660106  | 0.446738  | -0.478763 |
| H  | 5.710922  | 1.878008  | -0.236618 |
| H  | 3.296669  | 3.752495  | 1.993519  |
| H  | 4.909997  | 3.820073  | 1.214761  |
| H  | 5.094039  | 4.113984  | -1.319858 |
| H  | 3.610171  | 4.246462  | -2.316113 |
| C  | -3.228164 | 0.495926  | 0.337627  |
| C  | -3.369807 | 1.700395  | 1.073622  |
| C  | -4.028570 | 0.263103  | -0.814672 |
| C  | -4.349835 | 2.628528  | 0.678708  |
| C  | -4.990786 | 1.223225  | -1.177084 |
| C  | -5.151785 | 2.388217  | -0.432910 |
| H  | -4.493819 | 3.548340  | 1.230136  |
| H  | -5.619746 | 1.074972  | -2.044985 |
| H  | -5.898165 | 3.115443  | -0.725755 |
| C  | 1.488349  | -2.203558 | 0.045377  |
| C  | 1.633923  | -2.274796 | -1.364865 |
| C  | 2.626582  | -2.338371 | 0.890928  |
| C  | 2.920717  | -2.435370 | -1.908863 |
| C  | 3.895374  | -2.476860 | 0.298914  |
| C  | 4.038200  | -2.515978 | -1.084435 |
| H  | 3.064456  | -2.503912 | -2.978956 |
| H  | 4.783482  | -2.568806 | 0.910087  |
| H  | 5.021985  | -2.631173 | -1.520896 |

|   |           |           |           |
|---|-----------|-----------|-----------|
| C | -0.083493 | -4.350728 | 1.079707  |
| H | 0.780754  | -4.562940 | 0.419908  |
| H | 0.183646  | -4.614143 | 2.123776  |
| H | -0.900508 | -5.026038 | 0.746243  |
| C | -4.029903 | -1.645239 | 2.054321  |
| H | -4.614228 | -0.704854 | 2.029157  |
| H | -4.622745 | -2.438810 | 1.554259  |
| H | -3.906873 | -1.918305 | 3.123978  |
| C | 2.505901  | -2.391840 | 2.413890  |
| C | 3.218550  | -1.214298 | 3.090589  |
| C | 3.043118  | -3.724208 | 2.958306  |
| H | 1.443042  | -2.330163 | 2.723270  |
| H | 2.692951  | -0.268905 | 2.858275  |
| H | 3.197069  | -1.336941 | 4.194631  |
| H | 4.277490  | -1.136363 | 2.766678  |
| H | 2.597252  | -4.578560 | 2.407755  |
| H | 4.148054  | -3.780904 | 2.862414  |
| H | 2.780267  | -3.829244 | 4.032635  |
| C | 0.420365  | -2.250512 | -2.293428 |
| C | 0.262101  | -3.596260 | -3.010767 |
| C | 0.492358  | -1.099640 | -3.304425 |
| H | -0.514599 | -2.095643 | -1.715989 |
| H | 0.209085  | -4.419559 | -2.266487 |
| H | -0.678753 | -3.604715 | -3.601832 |
| H | 1.113066  | -3.786594 | -3.698553 |
| H | 0.486076  | -0.128797 | -2.771929 |
| H | 1.402996  | -1.164058 | -3.935164 |
| H | -0.393873 | -1.123491 | -3.973186 |
| C | -2.491128 | 2.001066  | 2.283833  |
| C | -3.326862 | 2.068439  | 3.567423  |
| C | -1.690315 | 3.293810  | 2.082526  |
| H | -1.744243 | 1.193641  | 2.435478  |
| H | -3.886709 | 1.119412  | 3.707218  |
| H | -2.662590 | 2.210473  | 4.446532  |
| H | -4.050272 | 2.910292  | 3.532701  |
| H | -1.134934 | 3.251334  | 1.123430  |
| H | -2.354719 | 4.183300  | 2.070624  |
| H | -0.953474 | 3.416669  | 2.904881  |
| C | -3.858813 | -0.988391 | -1.673341 |
| C | -3.410221 | -0.631674 | -3.095544 |
| C | -5.147303 | -1.820313 | -1.703759 |
| H | -3.067396 | -1.645207 | -1.258882 |
| H | -2.470942 | -0.043208 | -3.061318 |
| H | -3.212351 | -1.558590 | -3.675448 |
| H | -4.185335 | -0.041298 | -3.627989 |
| H | -5.485533 | -2.043124 | -0.670822 |
| H | -5.960667 | -1.284027 | -2.236475 |
| H | -4.963911 | -2.784715 | -2.223950 |

**L<sup>Me</sup>Fe(N<sub>3</sub>Ad-κN<sup>1</sup>)** (sextet, C<sub>39</sub>H<sub>56</sub>FeN<sub>5</sub>)

|    |           |           |           |
|----|-----------|-----------|-----------|
| N  | 2.272172  | 0.466757  | 0.686785  |
| N  | -0.121805 | 1.908297  | 0.589692  |
| C  | 2.738518  | 1.538361  | 1.342585  |
| C  | 0.661566  | 2.930338  | 0.980417  |
| C  | 1.963110  | 2.707338  | 1.468187  |
| H  | 2.453723  | 3.557360  | 1.936510  |
| N  | -0.431197 | -1.585843 | -0.621853 |
| N  | 0.327588  | -2.331601 | -1.503276 |
| N  | 1.460118  | -2.147580 | -1.788089 |
| Fe | 0.422069  | 0.023903  | 0.112926  |
| C  | -1.828841 | -2.060172 | -0.503774 |
| C  | -2.438046 | -1.392619 | 0.734763  |
| C  | -2.653469 | -1.656696 | -1.744218 |
| C  | -1.908697 | -3.594873 | -0.319550 |
| H  | -2.388071 | -0.293638 | 0.618630  |
| H  | -1.851110 | -1.659840 | 1.642010  |
| C  | -3.911167 | -1.820586 | 0.919016  |
| H  | -2.225507 | -2.122811 | -2.658970 |
| H  | -2.615624 | -0.555050 | -1.885755 |
| C  | -4.124982 | -2.096401 | -1.576071 |
| H  | -1.320341 | -3.906936 | 0.570707  |
| H  | -1.477726 | -4.119936 | -1.200166 |
| C  | -3.379161 | -4.037798 | -0.147929 |
| H  | -4.335904 | -1.323261 | 1.817549  |
| C  | -4.722844 | -1.410995 | -0.328490 |
| C  | -3.978447 | -3.351516 | 1.097604  |
| H  | -4.706445 | -1.801448 | -2.476455 |
| C  | -4.186600 | -3.629368 | -1.399767 |
| H  | -3.423214 | -5.141358 | -0.020985 |
| H  | -4.697757 | -0.306262 | -0.452178 |
| H  | -5.787743 | -1.706661 | -0.204437 |
| H  | -3.413623 | -3.653254 | 2.007071  |
| H  | -5.033685 | -3.672939 | 1.239624  |
| H  | -5.243987 | -3.957609 | -1.293944 |
| H  | -3.771712 | -4.132382 | -2.300812 |
| C  | 3.178811  | -0.573931 | 0.358626  |
| C  | 3.212680  | -1.748266 | 1.153364  |
| C  | 4.023751  | -0.454387 | -0.778987 |
| C  | 4.124623  | -2.767043 | 0.824252  |
| C  | 4.912190  | -1.503686 | -1.076790 |
| C  | 4.963535  | -2.643097 | -0.279192 |
| H  | 4.187782  | -3.666481 | 1.422447  |
| H  | 5.571299  | -1.443531 | -1.932811 |
| H  | 5.656115  | -3.439015 | -0.521146 |
| C  | -1.382558 | 2.213975  | 0.013741  |
| C  | -1.506501 | 2.256880  | -1.400041 |
| C  | -2.527920 | 2.400278  | 0.839561  |

|   |           |           |           |
|---|-----------|-----------|-----------|
| C | -2.780128 | 2.447832  | -1.965267 |
| C | -3.784588 | 2.556578  | 0.226805  |
| C | -3.906570 | 2.573928  | -1.158909 |
| H | -2.907108 | 2.503855  | -3.038073 |
| H | -4.678442 | 2.683203  | 0.823220  |
| H | -4.880490 | 2.708097  | -1.611760 |
| C | 0.200244  | 4.380488  | 1.012006  |
| H | -0.657561 | 4.585279  | 0.341403  |
| H | -0.074939 | 4.656310  | 2.050663  |
| H | 1.022109  | 5.049668  | 0.678176  |
| C | 4.119420  | 1.602919  | 1.977459  |
| H | 4.677313  | 0.646989  | 1.937012  |
| H | 4.725504  | 2.382538  | 1.471047  |
| H | 4.019990  | 1.875093  | 3.049682  |
| C | -2.425819 | 2.487882  | 2.362441  |
| C | -3.164962 | 1.336909  | 3.056225  |
| C | -2.949303 | 3.840387  | 2.869790  |
| H | -1.367734 | 2.417660  | 2.686715  |
| H | -2.646537 | 0.379403  | 2.858546  |
| H | -3.162331 | 1.487977  | 4.156945  |
| H | -4.218607 | 1.263337  | 2.714302  |
| H | -2.487851 | 4.675246  | 2.302501  |
| H | -4.052586 | 3.909487  | 2.763713  |
| H | -2.693685 | 3.967951  | 3.943426  |
| C | -0.281913 | 2.176028  | -2.310624 |
| C | -0.046542 | 3.516921  | -3.015116 |
| C | -0.395914 | 1.038265  | -3.333234 |
| H | 0.634538  | 1.967993  | -1.720158 |
| H | 0.046969  | 4.329785  | -2.263508 |
| H | 0.896530  | 3.479331  | -3.601472 |
| H | -0.883068 | 3.758800  | -3.704589 |
| H | -0.482666 | 0.066141  | -2.810988 |
| H | -1.272289 | 1.171792  | -4.000386 |
| H | 0.515773  | 1.003133  | -3.966171 |
| C | 2.298136  | -1.916574 | 2.362523  |
| C | 3.110193  | -1.952826 | 3.662151  |
| C | 1.420283  | -3.167316 | 2.229399  |
| H | 1.601084  | -1.056572 | 2.448408  |
| H | 3.723660  | -1.031198 | 3.752648  |
| H | 2.426669  | -2.000792 | 4.536651  |
| H | 3.782936  | -2.836019 | 3.690766  |
| H | 0.895051  | -3.159536 | 1.253128  |
| H | 2.024718  | -4.095849 | 2.301256  |
| H | 0.655751  | -3.182882 | 3.035357  |
| C | 3.985995  | 0.775299  | -1.683898 |
| C | 3.551446  | 0.408065  | -3.107804 |
| C | 5.341556  | 1.493518  | -1.700061 |
| H | 3.241738  | 1.510793  | -1.316162 |
| H | 2.563426  | -0.094194 | -3.086256 |
| H | 3.454056  | 1.327188  | -3.724473 |
| H | 4.287279  | -0.266387 | -3.594100 |



|   |          |          |           |
|---|----------|----------|-----------|
| H | 5.669287 | 1.720352 | -0.664606 |
| H | 6.120340 | 0.872760 | -2.191155 |
| H | 5.256281 | 2.452399 | -2.254640 |

**L<sup>Me</sup>Fe(N<sub>3</sub>Ad-κN<sup>3</sup>)** (quartet, C<sub>39</sub>H<sub>56</sub>FeN<sub>5</sub>)

|    |           |           |           |
|----|-----------|-----------|-----------|
| N  | 0.803127  | 1.935304  | 0.105549  |
| N  | 3.126801  | 0.136248  | -0.051793 |
| C  | 1.754744  | 2.852135  | 0.294349  |
| C  | 3.775276  | 1.281123  | 0.225106  |
| C  | 3.130813  | 2.529384  | 0.317581  |
| H  | 3.793452  | 3.375584  | 0.484943  |
| N  | -0.227232 | -1.103607 | -0.429475 |
| N  | -1.440757 | -1.246961 | -0.397263 |
| N  | -2.211444 | -2.235665 | -0.516150 |
| Fe | 1.176582  | 0.030806  | -0.231769 |
| C  | 5.275887  | 1.320598  | 0.470891  |
| H  | 5.759888  | 1.970479  | -0.288653 |
| H  | 5.475467  | 1.738298  | 1.480582  |
| H  | 5.764710  | 0.328321  | 0.423874  |
| C  | 1.433035  | 4.321923  | 0.513465  |
| H  | 1.811477  | 4.640444  | 1.507814  |
| H  | 1.928281  | 4.931223  | -0.272020 |
| H  | 0.350086  | 4.551414  | 0.476660  |
| C  | -0.574407 | 2.239514  | 0.220945  |
| C  | -1.217831 | 2.121134  | 1.479164  |
| C  | -1.319130 | 2.600317  | -0.930300 |
| C  | -2.582130 | 2.448795  | 1.578892  |
| C  | -2.682073 | 2.917750  | -0.786736 |
| C  | -3.299775 | 2.856240  | 0.458593  |
| H  | -3.098991 | 2.383289  | 2.527221  |
| H  | -3.275264 | 3.210150  | -1.643113 |
| H  | -4.347374 | 3.110780  | 0.553346  |
| C  | 3.778456  | -1.118640 | -0.028038 |
| C  | 4.436573  | -1.603929 | -1.187896 |
| C  | 3.709730  | -1.916096 | 1.142041  |
| C  | 5.060109  | -2.864128 | -1.137386 |
| C  | 4.351109  | -3.167868 | 1.150967  |
| C  | 5.022304  | -3.631933 | 0.023218  |
| H  | 5.573492  | -3.261967 | -2.002857 |
| H  | 4.328676  | -3.794074 | 2.033181  |
| H  | 5.507269  | -4.599437 | 0.045106  |
| C  | 2.960196  | -1.441910 | 2.384041  |
| C  | 3.913780  | -1.274225 | 3.572506  |
| C  | 1.805352  | -2.389589 | 2.730827  |
| H  | 2.500213  | -0.446629 | 2.210985  |
| H  | 4.741284  | -0.584607 | 3.299603  |
| H  | 3.369825  | -0.837554 | 4.437293  |
| H  | 4.345002  | -2.249028 | 3.883688  |
| H  | 1.123755  | -2.492301 | 1.859565  |
| H  | 2.179872  | -3.395178 | 3.015855  |

|   |           |           |           |
|---|-----------|-----------|-----------|
| H | 1.219859  | -1.979999 | 3.581214  |
| C | 4.461125  | -0.802922 | -2.485589 |
| C | 3.716766  | -1.545020 | -3.602166 |
| C | 5.897592  | -0.470670 | -2.909235 |
| H | 3.939480  | 0.168065  | -2.356291 |
| H | 2.678547  | -1.773820 | -3.278863 |
| H | 3.664024  | -0.909443 | -4.511902 |
| H | 4.228817  | -2.494583 | -3.865613 |
| H | 6.428613  | 0.050579  | -2.085060 |
| H | 6.462668  | -1.388507 | -3.175727 |
| H | 5.886156  | 0.202402  | -3.793019 |
| C | -0.466010 | 1.638247  | 2.715235  |
| C | -1.064822 | 0.331497  | 3.250543  |
| C | -0.437582 | 2.719397  | 3.801782  |
| H | 0.592650  | 1.413591  | 2.469210  |
| H | -1.054947 | -0.444318 | 2.455564  |
| H | -0.460121 | -0.041687 | 4.104352  |
| H | -2.109451 | 0.477331  | 3.597460  |
| H | -0.007889 | 3.658273  | 3.391525  |
| H | -1.457046 | 2.928964  | 4.188689  |
| H | 0.199258  | 2.388688  | 4.649927  |
| C | -0.677722 | 2.639124  | -2.312437 |
| C | -0.721768 | 4.053321  | -2.903374 |
| C | -1.340000 | 1.625474  | -3.254383 |
| H | 0.394148  | 2.355844  | -2.254930 |
| H | -0.242979 | 4.772109  | -2.204566 |
| H | -0.164367 | 4.080945  | -3.863973 |
| H | -1.766208 | 4.378444  | -3.094077 |
| H | -1.295026 | 0.608217  | -2.810014 |
| H | -2.402284 | 1.886030  | -3.446124 |
| H | -0.802638 | 1.602208  | -4.226413 |
| C | -3.652573 | -1.913193 | -0.398864 |
| C | -4.097353 | -0.907915 | -1.485526 |
| C | -4.426347 | -3.227104 | -0.588222 |
| C | -3.986083 | -1.331337 | 0.993364  |
| H | -3.855710 | -1.304919 | -2.496329 |
| H | -3.550099 | 0.053754  | -1.371369 |
| C | -5.616263 | -0.645283 | -1.376001 |
| H | -4.114804 | -3.969644 | 0.180147  |
| H | -4.193846 | -3.668856 | -1.582998 |
| C | -5.947094 | -2.976840 | -0.477288 |
| H | -3.436004 | -0.378746 | 1.156215  |
| H | -3.663303 | -2.036765 | 1.790846  |
| C | -5.504578 | -1.069288 | 1.109701  |
| H | -5.925870 | 0.079230  | -2.160267 |
| C | -6.380986 | -1.972681 | -1.567228 |
| C | -5.938122 | -0.065425 | 0.018861  |
| H | -6.493312 | -3.935057 | -0.616197 |
| C | -6.269550 | -2.396298 | 0.916858  |
| H | -5.733670 | -0.649659 | 2.113331  |
| H | -6.169778 | -2.391199 | -2.575842 |

|   |           |           |           |
|---|-----------|-----------|-----------|
| H | -7.476882 | -1.793247 | -1.505127 |
| H | -5.408241 | 0.899851  | 0.159499  |
| H | -7.027763 | 0.140785  | 0.102993  |
| H | -7.363891 | -2.222587 | 1.013206  |
| H | -5.977692 | -3.121754 | 1.707808  |

**L<sup>Me</sup>Fe(N<sub>3</sub>Ad-κN<sup>3</sup>)** (sextet, C<sub>39</sub>H<sub>56</sub>FeN<sub>5</sub>)

|    |           |           |           |
|----|-----------|-----------|-----------|
| N  | 0.711179  | 1.944597  | -0.025588 |
| N  | 3.061385  | 0.194163  | -0.115837 |
| C  | 1.653356  | 2.892914  | 0.058981  |
| C  | 3.702218  | 1.364367  | 0.012037  |
| C  | 3.033379  | 2.604614  | 0.037333  |
| H  | 3.683662  | 3.474190  | 0.100185  |
| N  | -0.009042 | -1.552632 | -0.322618 |
| N  | -1.243718 | -1.571888 | -0.276258 |
| N  | -2.088626 | -2.489369 | -0.115327 |
| Fe | 1.105581  | 0.023232  | -0.251611 |
| C  | 5.214574  | 1.449720  | 0.148822  |
| H  | 5.629927  | 2.049165  | -0.688835 |
| H  | 5.472672  | 1.945890  | 1.108421  |
| H  | 5.721932  | 0.465539  | 0.137793  |
| C  | 1.309295  | 4.368493  | 0.193727  |
| H  | 1.730922  | 4.762573  | 1.142653  |
| H  | 1.749575  | 4.931371  | -0.656514 |
| H  | 0.221575  | 4.576380  | 0.199641  |
| C  | -0.663821 | 2.242794  | 0.127426  |
| C  | -1.254188 | 2.195893  | 1.415741  |
| C  | -1.455394 | 2.538389  | -1.011099 |
| C  | -2.615897 | 2.521776  | 1.552637  |
| C  | -2.818169 | 2.838855  | -0.832176 |
| C  | -3.385391 | 2.845254  | 0.439043  |
| H  | -3.093625 | 2.506560  | 2.523335  |
| H  | -3.449701 | 3.069110  | -1.680037 |
| H  | -4.435108 | 3.080168  | 0.559711  |
| C  | 3.737476  | -1.044431 | -0.015439 |
| C  | 4.283590  | -1.652317 | -1.174873 |
| C  | 3.807247  | -1.702657 | 1.238363  |
| C  | 4.935521  | -2.892581 | -1.048510 |
| C  | 4.471297  | -2.939907 | 1.320882  |
| C  | 5.032229  | -3.523803 | 0.188510  |
| H  | 5.367630  | -3.380469 | -1.912311 |
| H  | 4.552653  | -3.461603 | 2.265414  |
| H  | 5.536988  | -4.478041 | 0.268377  |
| C  | 3.180250  | -1.096445 | 2.490606  |
| C  | 4.247415  | -0.788782 | 3.547320  |
| C  | 2.085089  | -2.006919 | 3.059388  |
| H  | 2.686122  | -0.130659 | 2.255987  |
| H  | 5.030390  | -0.129838 | 3.114372  |
| H  | 3.787246  | -0.259813 | 4.409183  |
| H  | 4.725405  | -1.719198 | 3.919967  |

|   |           |           |           |
|---|-----------|-----------|-----------|
| H | 1.317185  | -2.208257 | 2.282213  |
| H | 2.504879  | -2.973011 | 3.410315  |
| H | 1.585711  | -1.509674 | 3.917937  |
| C | 4.165059  | -0.999052 | -2.547819 |
| C | 3.339929  | -1.871066 | -3.501936 |
| C | 5.546789  | -0.691421 | -3.138301 |
| H | 3.632197  | -0.028122 | -2.475069 |
| H | 2.343539  | -2.081657 | -3.057280 |
| H | 3.183985  | -1.338909 | -4.464661 |
| H | 3.851202  | -2.834330 | -3.711467 |
| H | 6.133929  | -0.068774 | -2.430408 |
| H | 6.111780  | -1.623404 | -3.350479 |
| H | 5.436190  | -0.124705 | -4.087425 |
| C | -0.449709 | 1.784657  | 2.644299  |
| C | -1.011294 | 0.498988  | 3.263770  |
| C | -0.394224 | 2.918228  | 3.674947  |
| H | 0.601974  | 1.560258  | 2.369498  |
| H | -1.014496 | -0.315357 | 2.507909  |
| H | -0.374790 | 0.177530  | 4.115357  |
| H | -2.046745 | 0.648269  | 3.635896  |
| H | 0.005358  | 3.841048  | 3.202425  |
| H | -1.400338 | 3.133682  | 4.092254  |
| H | 0.280457  | 2.637561  | 4.511805  |
| C | -0.861673 | 2.531427  | -2.415563 |
| C | -0.995684 | 3.905828  | -3.082920 |
| C | -1.499244 | 1.434204  | -3.275586 |
| H | 0.224807  | 2.306622  | -2.381122 |
| H | -0.543885 | 4.688165  | -2.436348 |
| H | -0.459345 | 3.909143  | -4.055838 |
| H | -2.059678 | 4.162613  | -3.269164 |
| H | -1.344327 | 0.443941  | -2.796881 |
| H | -2.588447 | 1.605873  | -3.407748 |
| H | -1.021339 | 1.409550  | -4.278167 |
| C | -3.508157 | -2.075794 | -0.145450 |
| C | -3.908742 | -1.575688 | -1.550442 |
| C | -4.353942 | -3.309834 | 0.204141  |
| C | -3.796277 | -0.964407 | 0.888317  |
| H | -3.699574 | -2.360393 | -2.310878 |
| H | -3.307989 | -0.681833 | -1.825372 |
| C | -5.409293 | -1.208470 | -1.577230 |
| H | -4.074796 | -3.692853 | 1.211166  |
| H | -4.157006 | -4.128656 | -0.523519 |
| C | -5.858059 | -2.952745 | 0.185850  |
| H | -3.190845 | -0.063679 | 0.656442  |
| H | -3.505915 | -1.302738 | 1.907619  |
| C | -5.295018 | -0.591785 | 0.867231  |
| H | -5.686435 | -0.849563 | -2.592226 |
| C | -6.248325 | -2.454979 | -1.222723 |
| C | -5.682104 | -0.094321 | -0.543338 |
| H | -6.457687 | -3.853377 | 0.441023  |
| C | -6.134199 | -1.838807 | 1.219630  |

|   |           |           |           |
|---|-----------|-----------|-----------|
| H | -5.488683 | 0.211542  | 1.611009  |
| H | -6.071938 | -3.257652 | -1.972164 |
| H | -7.331857 | -2.205679 | -1.252044 |
| H | -5.095659 | 0.813019  | -0.803012 |
| H | -6.757144 | 0.189683  | -0.564531 |
| H | -7.216180 | -1.581276 | 1.222417  |
| H | -5.875162 | -2.195183 | 2.240887  |

**L<sup>Me</sup>Fe( $\eta^2$ -N<sub>3</sub>Ad)** (quartet, C<sub>39</sub>H<sub>56</sub>FeN<sub>5</sub>)

|    |           |           |           |
|----|-----------|-----------|-----------|
| N  | 0.752037  | 2.109489  | -0.104990 |
| N  | 2.780543  | 0.038057  | -0.126562 |
| C  | 1.824485  | 2.909871  | -0.103212 |
| C  | 3.606635  | 1.090042  | -0.089800 |
| C  | 3.145285  | 2.420341  | -0.130010 |
| H  | 3.922599  | 3.180622  | -0.136406 |
| N  | -0.171790 | -1.408868 | -0.237563 |
| N  | -0.971234 | -0.441151 | -0.186642 |
| N  | -2.177334 | -0.098109 | -0.133214 |
| Fe | 0.840127  | 0.159305  | -0.191669 |
| C  | 5.115871  | 0.933757  | 0.005136  |
| H  | 5.594207  | 1.406226  | -0.878855 |
| H  | 5.483493  | 1.436930  | 0.924500  |
| H  | 5.455156  | -0.119631 | 0.044791  |
| C  | 1.702480  | 4.425058  | -0.062159 |
| H  | 2.207142  | 4.813249  | 0.847887  |
| H  | 2.192108  | 4.861178  | -0.958607 |
| H  | 0.656962  | 4.789900  | -0.044868 |
| C  | -0.563049 | 2.613530  | 0.031931  |
| C  | -1.149201 | 2.702436  | 1.320503  |
| C  | -1.324195 | 2.928518  | -1.123212 |
| C  | -2.478312 | 3.149031  | 1.433916  |
| C  | -2.650347 | 3.370225  | -0.964018 |
| C  | -3.217343 | 3.480573  | 0.302190  |
| H  | -2.952336 | 3.233745  | 2.402869  |
| H  | -3.256134 | 3.622442  | -1.824341 |
| H  | -4.240908 | 3.816744  | 0.406644  |
| C  | 3.245063  | -1.288416 | 0.033172  |
| C  | 3.638673  | -2.044140 | -1.100606 |
| C  | 3.246887  | -1.878164 | 1.322428  |
| C  | 4.081009  | -3.366656 | -0.915241 |
| C  | 3.702188  | -3.201504 | 1.464031  |
| C  | 4.118452  | -3.933664 | 0.355628  |
| H  | 4.393499  | -3.968336 | -1.758583 |
| H  | 3.730574  | -3.675211 | 2.436499  |
| H  | 4.461878  | -4.952511 | 0.481050  |
| C  | 2.767845  | -1.108253 | 2.549756  |
| C  | 3.907873  | -0.913205 | 3.555802  |
| C  | 1.564893  | -1.798710 | 3.204744  |
| H  | 2.422663  | -0.091754 | 2.267301  |
| H  | 4.767495  | -0.411594 | 3.061702  |

|   |           |           |           |
|---|-----------|-----------|-----------|
| H | 3.567726  | -0.270319 | 4.395654  |
| H | 4.248462  | -1.884874 | 3.971657  |
| H | 0.746218  | -1.920855 | 2.463959  |
| H | 1.840341  | -2.796931 | 3.605061  |
| H | 1.182003  | -1.179506 | 4.043511  |
| C | 3.574219  | -1.460411 | -2.508012 |
| C | 2.576984  | -2.234626 | -3.378485 |
| C | 4.962440  | -1.423866 | -3.158996 |
| H | 3.213307  | -0.411149 | -2.481147 |
| H | 1.578379  | -2.247634 | -2.891058 |
| H | 2.472637  | -1.740760 | -4.368200 |
| H | 2.911593  | -3.280945 | -3.541031 |
| H | 5.673066  | -0.869168 | -2.510167 |
| H | 5.355781  | -2.448157 | -3.329027 |
| H | 4.908668  | -0.901932 | -4.138246 |
| C | -0.375199 | 2.311723  | 2.575834  |
| C | -1.044195 | 1.135035  | 3.297421  |
| C | -0.207640 | 3.512077  | 3.514632  |
| H | 0.649509  | 1.972698  | 2.317417  |
| H | -1.125886 | 0.265510  | 2.611754  |
| H | -0.431504 | 0.827709  | 4.171387  |
| H | -2.058571 | 1.405257  | 3.658707  |
| H | 0.273600  | 4.353679  | 2.971688  |
| H | -1.186988 | 3.852742  | 3.911877  |
| H | 0.442875  | 3.236076  | 4.371936  |
| C | -0.742842 | 2.780260  | -2.525230 |
| C | -0.700653 | 4.130514  | -3.250818 |
| C | -1.522128 | 1.740448  | -3.340834 |
| H | 0.304931  | 2.417025  | -2.478826 |
| H | -0.138228 | 4.871302  | -2.643373 |
| H | -0.183671 | 4.020630  | -4.228001 |
| H | -1.723544 | 4.520471  | -3.436756 |
| H | -1.530448 | 0.766292  | -2.807860 |
| H | -2.570073 | 2.064418  | -3.513117 |
| H | -1.034715 | 1.588441  | -4.327489 |
| C | -3.217665 | -1.149540 | -0.113535 |
| C | -3.079930 | -2.062516 | 1.126044  |
| C | -4.569294 | -0.421396 | -0.046423 |
| C | -3.179270 | -2.015530 | -1.392862 |
| H | -3.100578 | -1.450682 | 2.055127  |
| H | -2.109042 | -2.602725 | 1.111414  |
| C | -4.230904 | -3.093240 | 1.153952  |
| H | -4.685821 | 0.252637  | -0.924791 |
| H | -4.615127 | 0.219145  | 0.863033  |
| C | -5.729551 | -1.441125 | -0.019567 |
| H | -2.211312 | -2.555004 | -1.473890 |
| H | -3.271236 | -1.369435 | -2.294059 |
| C | -4.330565 | -3.046094 | -1.368371 |
| H | -4.122874 | -3.747473 | 2.046225  |
| C | -5.582692 | -2.350318 | 1.219596  |
| C | -4.179388 | -3.954598 | -0.127736 |

|   |           |           |           |
|---|-----------|-----------|-----------|
| H | -6.699625 | -0.900367 | 0.028873  |
| C | -5.682233 | -2.303256 | -1.299464 |
| H | -4.294253 | -3.666479 | -2.290132 |
| H | -5.636173 | -1.739630 | 2.147676  |
| H | -6.418644 | -3.083061 | 1.255627  |
| H | -3.214896 | -4.506433 | -0.176123 |
| H | -4.993894 | -4.711739 | -0.109700 |
| H | -6.519494 | -3.035387 | -1.296732 |
| H | -5.807856 | -1.658484 | -2.197023 |

**L<sup>Me</sup>Fe(py)** (quartet, C<sub>34</sub>H<sub>46</sub>FeN<sub>3</sub>)

|   |           |           |           |
|---|-----------|-----------|-----------|
| N | 1.461901  | -0.829794 | 0.728141  |
| N | -1.479946 | -0.859774 | 0.687108  |
| C | 1.264506  | -1.649714 | 1.771613  |
| C | -1.295858 | -1.718828 | 1.700651  |
| C | -0.016553 | -2.091172 | 2.165060  |
| H | -0.020423 | -2.797601 | 2.993351  |
| C | 2.740476  | -0.313316 | 0.417201  |
| C | 3.603029  | -1.026155 | -0.454830 |
| C | 3.113975  | 0.963427  | 0.908067  |
| C | 4.849196  | -0.463806 | -0.786253 |
| C | 4.370546  | 1.486875  | 0.554318  |
| C | 5.227733  | 0.777159  | -0.281782 |
| H | 5.532141  | -0.983024 | -1.445669 |
| H | 4.690640  | 2.452602  | 0.922761  |
| H | 6.189858  | 1.195936  | -0.547537 |
| C | -2.766629 | -0.398358 | 0.327392  |
| C | -3.277736 | 0.784615  | 0.919149  |
| C | -3.499859 | -1.066744 | -0.685371 |
| C | -4.543483 | 1.251523  | 0.521223  |
| C | -4.761094 | -0.565091 | -1.054748 |
| C | -5.276831 | 0.578885  | -0.452154 |
| H | -4.965640 | 2.146078  | 0.959867  |
| H | -5.348576 | -1.055431 | -1.819792 |
| H | -6.247921 | 0.953291  | -0.749621 |
| C | -2.458889 | -2.357204 | 2.445989  |
| H | -3.453781 | -2.061114 | 2.059951  |
| H | -2.388310 | -3.462802 | 2.366983  |
| H | -2.415501 | -2.069548 | 3.517847  |
| C | 2.411039  | -2.168655 | 2.626981  |
| H | 3.406287  | -1.797360 | 2.314245  |
| H | 2.257191  | -1.857067 | 3.681907  |
| H | 2.437007  | -3.277966 | 2.579789  |
| C | -2.943418 | -2.301014 | -1.386787 |
| C | -2.740454 | -2.038488 | -2.883989 |
| C | -3.842536 | -3.521764 | -1.156622 |
| H | -1.945475 | -2.566973 | -0.979975 |
| H | -2.084805 | -1.153141 | -3.028540 |
| H | -2.249473 | -2.913869 | -3.360345 |
| H | -3.708672 | -1.856507 | -3.396313 |

|    |           |           |           |
|----|-----------|-----------|-----------|
| H  | -3.982643 | -3.690642 | -0.067568 |
| H  | -4.837427 | -3.385402 | -1.630392 |
| H  | -3.369164 | -4.428905 | -1.589359 |
| C  | -2.481609 | 1.559275  | 1.965362  |
| C  | -3.225235 | 1.599753  | 3.305487  |
| C  | -2.149282 | 2.973595  | 1.474533  |
| H  | -1.507410 | 1.066294  | 2.164327  |
| H  | -3.460983 | 0.566659  | 3.639701  |
| H  | -2.587207 | 2.077027  | 4.079725  |
| H  | -4.170564 | 2.176605  | 3.224701  |
| H  | -1.590274 | 2.921227  | 0.516287  |
| H  | -3.069825 | 3.575443  | 1.322772  |
| H  | -1.508938 | 3.493171  | 2.218837  |
| C  | 3.200888  | -2.371520 | -1.050208 |
| C  | 4.172715  | -3.479519 | -0.625354 |
| C  | 3.094722  | -2.288700 | -2.577835 |
| H  | 2.198473  | -2.677689 | -0.685448 |
| H  | 4.247607  | -3.517311 | 0.482109  |
| H  | 3.803192  | -4.465168 | -0.980581 |
| H  | 5.185625  | -3.312048 | -1.048185 |
| H  | 2.375801  | -1.492416 | -2.865960 |
| H  | 4.080355  | -2.068175 | -3.039291 |
| H  | 2.723069  | -3.252838 | -2.986007 |
| C  | 2.187392  | 1.769595  | 1.814518  |
| C  | 1.804814  | 3.109295  | 1.173343  |
| C  | 2.817697  | 1.979549  | 3.196087  |
| H  | 1.234049  | 1.227608  | 1.986284  |
| H  | 1.323171  | 2.935517  | 0.188626  |
| H  | 1.078865  | 3.646469  | 1.820006  |
| H  | 2.693914  | 3.758613  | 1.030860  |
| H  | 3.087546  | 0.998389  | 3.642495  |
| H  | 3.730284  | 2.608832  | 3.130839  |
| H  | 2.092420  | 2.480019  | 3.872762  |
| Fe | -0.002001 | -0.052094 | -0.334495 |
| N  | -0.002720 | 1.084983  | -1.930484 |
| C  | 1.190699  | 1.600949  | -2.367118 |
| C  | -1.118941 | 1.835019  | -2.196955 |
| C  | 1.303700  | 2.831048  | -2.984934 |
| H  | 2.061705  | 0.974275  | -2.215019 |
| C  | -1.072529 | 3.071906  | -2.809517 |
| H  | -2.067047 | 1.392886  | -1.913623 |
| C  | 0.158496  | 3.602989  | -3.211799 |
| H  | 2.282941  | 3.174945  | -3.300068 |
| H  | -1.998582 | 3.608825  | -2.984398 |
| H  | 0.219783  | 4.566359  | -3.704136 |

**L<sup>Me</sup>Fe(py)** (sextet, C<sub>34</sub>H<sub>46</sub>FeN<sub>3</sub>)

|   |           |           |          |
|---|-----------|-----------|----------|
| N | 1.457476  | -1.111603 | 0.182203 |
| N | -1.473323 | -1.090083 | 0.219206 |
| C | 1.266521  | -2.382288 | 0.560398 |



|   |           |           |           |
|---|-----------|-----------|-----------|
| C | -1.288254 | -2.346583 | 0.644823  |
| C | -0.014164 | -2.942934 | 0.739648  |
| H | -0.018472 | -3.986163 | 1.046895  |
| C | 2.746054  | -0.532085 | 0.127145  |
| C | 3.473638  | -0.541489 | -1.089825 |
| C | 3.265057  | 0.133639  | 1.266231  |
| C | 4.737392  | 0.074996  | -1.130937 |
| C | 4.532946  | 0.736948  | 1.182160  |
| C | 5.261021  | 0.701743  | -0.003704 |
| H | 5.320862  | 0.079427  | -2.042200 |
| H | 4.960230  | 1.246607  | 2.035703  |
| H | 6.233762  | 1.174013  | -0.052874 |
| C | -2.744317 | -0.470368 | 0.244634  |
| C | -3.110290 | 0.325564  | 1.359221  |
| C | -3.609554 | -0.576525 | -0.874340 |
| C | -4.367771 | 0.955587  | 1.361425  |
| C | -4.855352 | 0.075689  | -0.833801 |
| C | -5.230457 | 0.826682  | 0.276648  |
| H | -4.682948 | 1.557354  | 2.203682  |
| H | -5.540449 | 0.011302  | -1.668866 |
| H | -6.192614 | 1.322376  | 0.291709  |
| C | -2.445405 | -3.238123 | 1.068151  |
| H | -3.436376 | -2.748595 | 1.000840  |
| H | -2.473685 | -4.141334 | 0.422467  |
| H | -2.302716 | -3.554811 | 2.123132  |
| C | 2.425791  | -3.326161 | 0.839537  |
| H | 3.422365  | -2.869870 | 0.680784  |
| H | 2.378425  | -3.670068 | 1.894531  |
| H | 2.355155  | -4.209320 | 0.169730  |
| C | -3.207934 | -1.358314 | -2.120520 |
| C | -3.099954 | -0.432772 | -3.338515 |
| C | -4.180727 | -2.513044 | -2.390023 |
| H | -2.205839 | -1.817081 | -1.989564 |
| H | -2.385762 | 0.391629  | -3.126672 |
| H | -2.722026 | -1.000687 | -4.215394 |
| H | -4.086307 | 0.004515  | -3.601184 |
| H | -4.255415 | -3.165575 | -1.494375 |
| H | -5.193529 | -2.136523 | -2.645482 |
| H | -3.812055 | -3.129775 | -3.237343 |
| C | -2.170778 | 0.509556  | 2.547384  |
| C | -2.779303 | -0.079165 | 3.825131  |
| C | -1.800491 | 1.985308  | 2.740838  |
| H | -1.214044 | -0.027941 | 2.380415  |
| H | -3.036439 | -1.148189 | 3.664415  |
| H | -2.045672 | -0.020600 | 4.657435  |
| H | -3.696427 | 0.470704  | 4.124506  |
| H | -1.362140 | 2.394186  | 1.805874  |
| H | -2.688257 | 2.592100  | 3.016966  |
| H | -1.044775 | 2.084171  | 3.548649  |
| C | 2.909537  | -1.190551 | -2.349200 |
| C | 3.800970  | -2.344332 | -2.824274 |

|    |           |           |           |
|----|-----------|-----------|-----------|
| C  | 2.709265  | -0.153238 | -3.460855 |
| H  | 1.909531  | -1.629566 | -2.150613 |
| H  | 3.937079  | -3.081678 | -2.004538 |
| H  | 3.323655  | -2.864682 | -3.681972 |
| H  | 4.797959  | -1.977477 | -3.147241 |
| H  | 2.057541  | 0.670371  | -3.098517 |
| H  | 3.678702  | 0.274628  | -3.792678 |
| H  | 2.214950  | -0.625184 | -4.336740 |
| C  | 2.472370  | 0.220676  | 2.566764  |
| C  | 2.139609  | 1.676613  | 2.914148  |
| C  | 3.219261  | -0.466064 | 3.716148  |
| H  | 1.498735  | -0.303290 | 2.471353  |
| H  | 1.576140  | 2.146094  | 2.079443  |
| H  | 1.504207  | 1.714096  | 3.824492  |
| H  | 3.060483  | 2.266908  | 3.104640  |
| H  | 3.458470  | -1.515285 | 3.439475  |
| H  | 4.162758  | 0.066452  | 3.959266  |
| H  | 2.581774  | -0.484486 | 4.625866  |
| Fe | -0.003227 | 0.130093  | -0.272665 |
| N  | -0.005008 | 1.983304  | -0.842075 |
| C  | 1.179604  | 2.732276  | -0.960490 |
| C  | -1.189502 | 2.671866  | -1.161058 |
| C  | 1.200878  | 4.034817  | -1.365407 |
| H  | 2.097493  | 2.212405  | -0.704984 |
| C  | -1.207730 | 3.973884  | -1.568044 |
| H  | -2.109531 | 2.104355  | -1.064652 |
| C  | -0.002444 | 4.716515  | -1.692682 |
| H  | 2.159330  | 4.540911  | -1.429612 |
| H  | -2.165944 | 4.431520  | -1.794578 |
| H  | -0.001215 | 5.748373  | -2.018781 |

**L<sup>Me</sup>Fe(py)<sub>2</sub>** (quartet, C<sub>39</sub>H<sub>51</sub>FeN<sub>4</sub>)

|   |           |           |           |
|---|-----------|-----------|-----------|
| N | 1.559820  | -0.093289 | -1.110082 |
| N | -1.405185 | -0.430583 | -1.109626 |
| C | 1.364169  | -0.239067 | -2.429269 |
| C | -1.178240 | -0.608439 | -2.412475 |
| C | 0.088095  | -0.385396 | -3.013276 |
| H | 0.092412  | -0.461834 | -4.099676 |
| C | -2.258650 | -1.080393 | -3.375599 |
| H | -2.429615 | -0.303881 | -4.150855 |
| H | -1.928503 | -2.016396 | -3.874043 |
| H | -3.230609 | -1.291535 | -2.889155 |
| C | 2.522348  | -0.230391 | -3.415656 |
| H | 2.544260  | -1.188530 | -3.976021 |
| H | 2.388245  | 0.603045  | -4.137427 |
| H | 3.509662  | -0.091979 | -2.932767 |
| C | 2.827500  | -0.335622 | -0.516393 |
| C | 3.268675  | -1.669366 | -0.290587 |
| C | 3.651373  | 0.755525  | -0.131112 |
| C | 4.525266  | -1.880416 | 0.306701  |

|   |           |           |           |
|---|-----------|-----------|-----------|
| C | 4.893608  | 0.495683  | 0.475156  |
| C | 5.323565  | -0.808558 | 0.688684  |
| H | 4.892701  | -2.882516 | 0.484118  |
| H | 5.541199  | 1.307510  | 0.779365  |
| H | 6.285143  | -0.990330 | 1.151386  |
| C | -2.650073 | -0.761009 | -0.510916 |
| C | -3.715506 | 0.180783  | -0.506810 |
| C | -2.839121 | -2.046673 | 0.062886  |
| C | -4.956854 | -0.194989 | 0.037295  |
| C | -4.110581 | -2.392023 | 0.557329  |
| C | -5.152897 | -1.471980 | 0.550257  |
| H | -5.786280 | 0.499735  | 0.054802  |
| H | -4.302438 | -3.379123 | 0.955390  |
| H | -6.120495 | -1.750475 | 0.947706  |
| C | -1.708793 | -3.067829 | 0.122401  |
| C | -1.951700 | -4.200527 | -0.879685 |
| C | -1.517139 | -3.627566 | 1.541245  |
| H | -0.747722 | -2.588916 | -0.154041 |
| H | -2.060641 | -3.785419 | -1.903923 |
| H | -1.088710 | -4.900215 | -0.880707 |
| H | -2.871294 | -4.768297 | -0.622820 |
| H | -1.357493 | -2.801973 | 2.263626  |
| H | -2.392508 | -4.225637 | 1.867913  |
| H | -0.629897 | -4.291720 | 1.575229  |
| C | -3.550018 | 1.582944  | -1.078131 |
| C | -3.742247 | 2.646102  | 0.010996  |
| C | -4.505667 | 1.826548  | -2.253165 |
| H | -2.527418 | 1.715188  | -1.478676 |
| H | -3.088357 | 2.425178  | 0.880449  |
| H | -3.471323 | 3.648467  | -0.384002 |
| H | -4.795842 | 2.678504  | 0.360150  |
| H | -4.369754 | 1.042603  | -3.027145 |
| H | -5.565024 | 1.820501  | -1.920774 |
| H | -4.289970 | 2.812286  | -2.718058 |
| C | 2.419032  | -2.876668 | -0.673026 |
| C | 2.078935  | -3.727812 | 0.555788  |
| C | 3.114723  | -3.723717 | -1.745706 |
| H | 1.450885  | -2.555159 | -1.104220 |
| H | 1.570064  | -3.103779 | 1.320240  |
| H | 1.396595  | -4.554009 | 0.264040  |
| H | 2.989687  | -4.174594 | 1.006345  |
| H | 3.379017  | -3.092821 | -2.619852 |
| H | 4.040998  | -4.191943 | -1.350866 |
| H | 2.433729  | -4.529769 | -2.093419 |
| C | 3.236965  | 2.197929  | -0.382776 |
| C | 4.209447  | 2.899631  | -1.338694 |
| C | 3.105695  | 2.972193  | 0.934655  |
| H | 2.249392  | 2.229132  | -0.877244 |
| H | 4.293383  | 2.325020  | -2.285677 |
| H | 3.832904  | 3.915976  | -1.583070 |
| H | 5.219224  | 2.998605  | -0.887694 |

|    |           |           |           |
|----|-----------|-----------|-----------|
| H  | 2.449966  | 2.417746  | 1.639173  |
| H  | 4.095924  | 3.120651  | 1.414590  |
| H  | 2.653277  | 3.969134  | 0.745366  |
| Fe | 0.025676  | 0.243347  | 0.158864  |
| N  | -0.227668 | 2.412452  | 0.275054  |
| C  | -0.342729 | 3.088997  | 1.431793  |
| C  | -0.277637 | 3.120277  | -0.870132 |
| C  | -0.507833 | 4.468092  | 1.489907  |
| H  | -0.298951 | 2.492277  | 2.335988  |
| C  | -0.438168 | 4.498486  | -0.901556 |
| H  | -0.178978 | 2.546023  | -1.785571 |
| C  | -0.556689 | 5.191306  | 0.301830  |
| H  | -0.593730 | 4.958492  | 2.453052  |
| H  | -0.469451 | 5.013705  | -1.854837 |
| H  | -0.683388 | 6.268653  | 0.312049  |
| H  | -2.139005 | 0.191992  | 2.225458  |
| C  | -1.256824 | -0.054370 | 2.807568  |
| C  | -1.344658 | -0.211207 | 4.173960  |
| N  | -0.089680 | -0.208346 | 2.092987  |
| C  | -0.202206 | -0.544705 | 4.919717  |
| H  | -2.308678 | -0.081262 | 4.655356  |
| C  | 1.018010  | -0.539361 | 2.839265  |
| C  | 0.997172  | -0.704156 | 4.207763  |
| H  | -0.247355 | -0.684986 | 5.992927  |
| H  | 1.936078  | -0.684950 | 2.281098  |
| H  | 1.918029  | -0.970559 | 4.716553  |

**L<sup>Me</sup>Fe(py)<sub>2</sub>** (sextet, C<sub>39</sub>H<sub>51</sub>FeN<sub>4</sub>)

|   |           |           |           |
|---|-----------|-----------|-----------|
| N | 1.563014  | -0.035593 | -1.066872 |
| N | -1.366482 | -0.401123 | -1.120686 |
| C | 1.390559  | -0.065786 | -2.397263 |
| C | -1.128545 | -0.510866 | -2.426526 |
| C | 0.129396  | -0.206916 | -3.006855 |
| H | 0.142773  | -0.208190 | -4.094944 |
| C | -2.183100 | -0.982427 | -3.417547 |
| H | -2.384408 | -0.177743 | -4.155907 |
| H | -1.809903 | -1.877897 | -3.958281 |
| H | -3.147094 | -1.259210 | -2.948556 |
| C | 2.559039  | 0.055623  | -3.363266 |
| H | 2.616127  | -0.853643 | -3.997808 |
| H | 2.407301  | 0.939612  | -4.018324 |
| H | 3.537206  | 0.183997  | -2.859703 |
| C | 2.840108  | -0.244023 | -0.481518 |
| C | 3.357500  | -1.562132 | -0.347991 |
| C | 3.598618  | 0.863199  | -0.016670 |
| C | 4.624131  | -1.742170 | 0.237911  |
| C | 4.854822  | 0.633766  | 0.573103  |
| C | 5.359772  | -0.655331 | 0.696021  |
| H | 5.047963  | -2.731699 | 0.347120  |
| H | 5.454938  | 1.458255  | 0.935065  |

|    |           |           |           |
|----|-----------|-----------|-----------|
| H  | 6.330618  | -0.813294 | 1.147983  |
| C  | -2.593706 | -0.825937 | -0.545912 |
| C  | -3.705682 | 0.059469  | -0.498502 |
| C  | -2.716882 | -2.145791 | -0.035687 |
| C  | -4.926149 | -0.404722 | 0.023930  |
| C  | -3.969163 | -2.578739 | 0.438517  |
| C  | -5.056819 | -1.713387 | 0.474069  |
| H  | -5.789897 | 0.245255  | 0.072691  |
| H  | -4.110833 | -3.592556 | 0.787372  |
| H  | -6.008944 | -2.059644 | 0.855294  |
| C  | -1.536264 | -3.110105 | -0.024113 |
| C  | -1.722708 | -4.203662 | -1.080335 |
| C  | -1.315563 | -3.727466 | 1.366058  |
| H  | -0.600658 | -2.570391 | -0.275116 |
| H  | -1.853516 | -3.745361 | -2.083363 |
| H  | -0.825604 | -4.858103 | -1.114215 |
| H  | -2.612202 | -4.828910 | -0.852622 |
| H  | -1.191570 | -2.930112 | 2.125780  |
| H  | -2.161789 | -4.379502 | 1.664889  |
| H  | -0.399284 | -4.351623 | 1.367991  |
| C  | -3.612544 | 1.493639  | -1.003887 |
| C  | -3.863054 | 2.495180  | 0.130941  |
| C  | -4.576889 | 1.740679  | -2.171115 |
| H  | -2.597204 | 1.697577  | -1.392823 |
| H  | -3.202923 | 2.268943  | 0.993993  |
| H  | -3.640802 | 3.526755  | -0.216659 |
| H  | -4.918500 | 2.458773  | 0.474073  |
| H  | -4.397645 | 1.002271  | -2.980151 |
| H  | -5.635209 | 1.662640  | -1.844530 |
| H  | -4.413013 | 2.757142  | -2.588594 |
| C  | 2.576224  | -2.785521 | -0.814518 |
| C  | 2.285590  | -3.734100 | 0.354110  |
| C  | 3.316633  | -3.518380 | -1.939936 |
| H  | 1.591679  | -2.488812 | -1.226668 |
| H  | 1.763953  | -3.185446 | 1.166402  |
| H  | 1.632231  | -4.564577 | 0.012224  |
| H  | 3.219509  | -4.173649 | 0.762620  |
| H  | 3.541006  | -2.816850 | -2.770389 |
| H  | 4.269727  | -3.957026 | -1.576209 |
| H  | 2.682370  | -4.337948 | -2.340410 |
| C  | 3.099383  | 2.292731  | -0.166346 |
| C  | 4.027067  | 3.116424  | -1.067783 |
| C  | 2.924824  | 2.962534  | 1.202134  |
| H  | 2.110300  | 2.300245  | -0.658921 |
| H  | 4.144610  | 2.615273  | -2.052186 |
| H  | 3.589787  | 4.122833  | -1.242208 |
| H  | 5.029338  | 3.244126  | -0.607343 |
| H  | 2.284276  | 2.332346  | 1.855362  |
| H  | 3.903448  | 3.115146  | 1.703902  |
| H  | 2.435232  | 3.952310  | 1.080277  |
| Fe | 0.016925  | 0.377180  | 0.156162  |

|   |           |           |           |
|---|-----------|-----------|-----------|
| N | -0.384549 | 2.478785  | 0.327816  |
| C | -0.500805 | 3.124593  | 1.514805  |
| C | -0.418833 | 3.240724  | -0.799389 |
| C | -0.665935 | 4.493263  | 1.617770  |
| H | -0.454910 | 2.497017  | 2.397308  |
| C | -0.573935 | 4.614725  | -0.775814 |
| H | -0.315355 | 2.706172  | -1.737782 |
| C | -0.706040 | 5.271273  | 0.451605  |
| H | -0.760045 | 4.944859  | 2.598901  |
| H | -0.594362 | 5.162797  | -1.711380 |
| H | -0.830695 | 6.346858  | 0.500360  |
| H | -2.149625 | 0.237240  | 2.260915  |
| C | -1.301194 | -0.175439 | 2.798163  |
| C | -1.443905 | -0.638563 | 4.082063  |
| N | -0.102354 | -0.204222 | 2.105811  |
| C | -0.334680 | -1.185142 | 4.768229  |
| H | -2.419934 | -0.584889 | 4.553810  |
| C | 0.978120  | -0.726902 | 2.792076  |
| C | 0.896706  | -1.211817 | 4.073652  |
| H | -0.423978 | -1.563649 | 5.778686  |
| H | 1.920309  | -0.741877 | 2.254518  |
| H | 1.791157  | -1.612452 | 4.539749  |

**L<sup>Me</sup>Fe(NAd) (2)** (quartet, C<sub>39</sub>H<sub>56</sub>FeN<sub>3</sub>)

|   |           |           |           |
|---|-----------|-----------|-----------|
| N | 0.152251  | -2.177863 | -0.161348 |
| N | -2.323717 | -0.698742 | -0.163768 |
| C | -0.669037 | -3.229877 | -0.233306 |
| C | -2.856955 | -1.924820 | -0.238446 |
| C | -2.071103 | -3.093296 | -0.299730 |
| H | -2.626128 | -4.025082 | -0.377665 |
| N | 0.588321  | 1.026195  | -0.005867 |
| C | 1.566056  | 2.056723  | 0.003152  |
| C | 1.482932  | 2.898538  | -1.287535 |
| C | 1.366158  | 2.979625  | 1.223902  |
| C | 2.966383  | 1.411255  | 0.091563  |
| H | 0.476969  | 3.366607  | -1.372440 |
| H | 1.617479  | 2.249143  | -2.180271 |
| C | 2.568516  | 3.997670  | -1.276619 |
| H | 1.418662  | 2.390354  | 2.165740  |
| H | 0.357267  | 3.447763  | 1.186465  |
| C | 2.450537  | 4.080285  | 1.242027  |
| H | 3.132626  | 0.731358  | -0.772766 |
| H | 3.048224  | 0.791839  | 1.012016  |
| C | 4.057914  | 2.503735  | 0.105935  |
| H | 2.498810  | 4.598538  | -2.209299 |
| C | 2.355364  | 4.916051  | -0.053278 |
| C | 3.962824  | 3.339206  | -1.189315 |
| H | 2.295625  | 4.740597  | 2.122805  |
| C | 3.845351  | 3.422923  | 1.328413  |
| H | 5.060241  | 2.026982  | 0.168566  |

|   |           |           |           |
|---|-----------|-----------|-----------|
| H | 1.359606  | 5.407640  | -0.115970 |
| H | 3.122779  | 5.721027  | -0.043764 |
| H | 4.131499  | 2.687508  | -2.074841 |
| H | 4.753931  | 4.120903  | -1.196763 |
| H | 4.634281  | 4.206330  | 1.357267  |
| H | 3.929619  | 2.832119  | 2.267093  |
| C | 1.551039  | -2.307767 | -0.009634 |
| C | 2.385889  | -2.336352 | -1.155390 |
| C | 2.118584  | -2.278177 | 1.289224  |
| C | 3.781255  | -2.365096 | -0.979023 |
| C | 3.518659  | -2.310119 | 1.420516  |
| C | 4.338356  | -2.353784 | 0.296480  |
| H | 4.446069  | -2.386577 | -1.832422 |
| H | 3.982782  | -2.291693 | 2.397765  |
| H | 5.414141  | -2.371701 | 0.414646  |
| C | -3.113603 | 0.462386  | -0.006064 |
| C | -3.378613 | 0.956933  | 1.295600  |
| C | -3.554133 | 1.178371  | -1.147525 |
| C | -4.137998 | 2.132746  | 1.434611  |
| C | -4.308649 | 2.351475  | -0.964376 |
| C | -4.602489 | 2.816659  | 0.314499  |
| H | -4.365369 | 2.531163  | 2.414657  |
| H | -4.664514 | 2.918223  | -1.814694 |
| H | -5.181861 | 3.722580  | 0.438333  |
| C | -4.359257 | -2.153672 | -0.259653 |
| H | -4.953216 | -1.219878 | -0.214944 |
| H | -4.640744 | -2.683646 | -1.194204 |
| H | -4.651395 | -2.778896 | 0.610534  |
| C | -0.152427 | -4.658561 | -0.245737 |
| H | 0.951533  | -4.732491 | -0.192990 |
| H | -0.567599 | -5.210565 | 0.623951  |
| H | -0.477201 | -5.162423 | -1.180656 |
| C | -3.205524 | 0.716952  | -2.558522 |
| C | -2.324433 | 1.750223  | -3.271206 |
| C | -4.469302 | 0.411766  | -3.371737 |
| H | -2.618220 | -0.224490 | -2.529913 |
| H | -1.414292 | 1.953778  | -2.666878 |
| H | -2.002729 | 1.358642  | -4.259854 |
| H | -2.870717 | 2.703756  | -3.430810 |
| H | -5.097013 | -0.330568 | -2.834037 |
| H | -5.068437 | 1.329929  | -3.547103 |
| H | -4.191457 | -0.019075 | -4.357344 |
| C | -2.844135 | 0.250678  | 2.537988  |
| C | -3.989278 | -0.229530 | 3.437057  |
| C | -1.873747 | 1.152452  | 3.310316  |
| H | -2.266401 | -0.655185 | 2.259034  |
| H | -4.681296 | -0.876288 | 2.856109  |
| H | -3.584000 | -0.826649 | 4.281755  |
| H | -4.560725 | 0.626191  | 3.854229  |
| H | -1.048925 | 1.480160  | 2.642373  |
| H | -2.389765 | 2.049658  | 3.712252  |

|    |           |           |           |
|----|-----------|-----------|-----------|
| H  | -1.428452 | 0.592419  | 4.160050  |
| C  | 1.803701  | -2.322025 | -2.565075 |
| C  | 2.207154  | -3.579732 | -3.344410 |
| C  | 2.212318  | -1.050669 | -3.317852 |
| H  | 0.694423  | -2.319999 | -2.531894 |
| H  | 1.914797  | -4.488776 | -2.776509 |
| H  | 1.685831  | -3.602121 | -4.325218 |
| H  | 3.301663  | -3.606850 | -3.528991 |
| H  | 1.874149  | -0.155644 | -2.755269 |
| H  | 3.313021  | -0.997480 | -3.454067 |
| H  | 1.731125  | -1.029123 | -4.318928 |
| C  | 1.244351  | -2.206694 | 2.537954  |
| C  | 1.496901  | -0.911818 | 3.318575  |
| C  | 1.451236  | -3.438105 | 3.427691  |
| H  | 0.168296  | -2.197974 | 2.266223  |
| H  | 1.300415  | -0.035592 | 2.666863  |
| H  | 0.810434  | -0.852319 | 4.189887  |
| H  | 2.542179  | -0.859659 | 3.689136  |
| H  | 1.271477  | -4.364322 | 2.840697  |
| H  | 2.480893  | -3.468056 | 3.842140  |
| H  | 0.732309  | -3.420004 | 4.274536  |
| Fe | -0.420980 | -0.333022 | -0.129006 |

**L<sup>Me</sup>Fe(NAd) (2)** (sextet, C<sub>39</sub>H<sub>56</sub>FeN<sub>3</sub>)

|   |           |           |           |
|---|-----------|-----------|-----------|
| N | 0.138874  | -2.138568 | -0.193585 |
| N | -2.397869 | -0.613578 | -0.204388 |
| C | -0.702013 | -3.167102 | -0.256298 |
| C | -2.904070 | -1.854711 | -0.251283 |
| C | -2.108384 | -3.013453 | -0.330770 |
| H | -2.664322 | -3.945689 | -0.403816 |
| N | 0.972980  | 0.805390  | -0.194350 |
| C | 1.863083  | 1.913817  | -0.097825 |
| C | 1.809078  | 2.756500  | -1.391646 |
| C | 1.471619  | 2.814429  | 1.095056  |
| C | 3.305211  | 1.403735  | 0.109521  |
| H | 0.774300  | 3.129160  | -1.561992 |
| H | 2.079422  | 2.132243  | -2.270488 |
| C | 2.783404  | 3.951594  | -1.292432 |
| H | 1.494554  | 2.232621  | 2.041562  |
| H | 0.431239  | 3.188134  | 0.966413  |
| C | 2.444456  | 4.009530  | 1.204864  |
| H | 3.604491  | 0.747203  | -0.737870 |
| H | 3.363900  | 0.788129  | 1.034834  |
| C | 4.283132  | 2.594629  | 0.214880  |
| H | 2.737309  | 4.547980  | -2.229458 |
| C | 2.383721  | 4.840368  | -0.094953 |
| C | 4.220552  | 3.425108  | -1.085581 |
| H | 2.153997  | 4.647544  | 2.067651  |
| C | 3.881373  | 3.482812  | 1.412632  |
| H | 5.317043  | 2.214400  | 0.364047  |



|   |           |           |           |
|---|-----------|-----------|-----------|
| H | 1.356051  | 5.239009  | -0.243666 |
| H | 3.070547  | 5.712127  | -0.021928 |
| H | 4.523744  | 2.797273  | -1.952251 |
| H | 4.933161  | 4.277052  | -1.027489 |
| H | 4.589028  | 4.335509  | 1.508109  |
| H | 3.938571  | 2.896707  | 2.356271  |
| C | 1.533647  | -2.302433 | -0.022834 |
| C | 2.382501  | -2.372046 | -1.157000 |
| C | 2.084424  | -2.307598 | 1.284059  |
| C | 3.772129  | -2.469895 | -0.961387 |
| C | 3.479456  | -2.407654 | 1.434028  |
| C | 4.311525  | -2.487020 | 0.321373  |
| H | 4.446493  | -2.528972 | -1.805483 |
| H | 3.930339  | -2.420047 | 2.417541  |
| H | 5.383278  | -2.559835 | 0.454226  |
| C | -3.215713 | 0.516300  | 0.027994  |
| C | -3.418356 | 0.972755  | 1.354821  |
| C | -3.757713 | 1.235620  | -1.067217 |
| C | -4.214326 | 2.112878  | 1.567493  |
| C | -4.544922 | 2.372922  | -0.810482 |
| C | -4.775257 | 2.799792  | 0.494428  |
| H | -4.396632 | 2.480784  | 2.568654  |
| H | -4.977764 | 2.940647  | -1.623643 |
| H | -5.381912 | 3.677940  | 0.674817  |
| C | -4.403434 | -2.116462 | -0.219867 |
| H | -5.018570 | -1.197524 | -0.162278 |
| H | -4.705296 | -2.659736 | -1.140430 |
| H | -4.652685 | -2.740776 | 0.664315  |
| C | -0.219796 | -4.610615 | -0.243304 |
| H | 0.881578  | -4.712110 | -0.184153 |
| H | -0.652027 | -5.138546 | 0.633056  |
| H | -0.552234 | -5.121693 | -1.171637 |
| C | -3.488243 | 0.813426  | -2.507539 |
| C | -2.700554 | 1.894433  | -3.257753 |
| C | -4.791477 | 0.470644  | -3.239781 |
| H | -2.863180 | -0.103375 | -2.536996 |
| H | -1.759607 | 2.125056  | -2.713007 |
| H | -2.432696 | 1.533746  | -4.273849 |
| H | -3.294458 | 2.827107  | -3.360635 |
| H | -5.351690 | -0.305638 | -2.676305 |
| H | -5.436993 | 1.366456  | -3.356372 |
| H | -4.564442 | 0.068333  | -4.250151 |
| C | -2.781921 | 0.262465  | 2.545938  |
| C | -3.850765 | -0.286770 | 3.497844  |
| C | -1.806046 | 1.187474  | 3.282998  |
| H | -2.184244 | -0.610952 | 2.211380  |
| H | -4.548740 | -0.949099 | 2.942131  |
| H | -3.371625 | -0.885233 | 4.301974  |
| H | -4.431301 | 0.534050  | 3.969138  |
| H | -1.032760 | 1.559939  | 2.577896  |
| H | -2.333142 | 2.055612  | 3.731607  |

|    |           |           |           |
|----|-----------|-----------|-----------|
| H  | -1.293556 | 0.630065  | 4.095540  |
| C  | 1.821801  | -2.344373 | -2.574829 |
| C  | 2.142475  | -3.645336 | -3.320616 |
| C  | 2.335503  | -1.125283 | -3.349162 |
| H  | 0.715421  | -2.257845 | -2.557441 |
| H  | 1.767391  | -4.517091 | -2.743210 |
| H  | 1.643370  | -3.647196 | -4.313154 |
| H  | 3.235671  | -3.761398 | -3.477034 |
| H  | 2.088429  | -0.197378 | -2.794314 |
| H  | 3.434665  | -1.173572 | -3.498434 |
| H  | 1.846584  | -1.073034 | -4.345351 |
| C  | 1.198202  | -2.210696 | 2.522214  |
| C  | 1.519111  | -0.953247 | 3.337577  |
| C  | 1.317559  | -3.472730 | 3.384457  |
| H  | 0.129003  | -2.127965 | 2.236443  |
| H  | 1.402181  | -0.053666 | 2.699648  |
| H  | 0.815953  | -0.864428 | 4.192795  |
| H  | 2.554922  | -0.981182 | 3.736059  |
| H  | 1.085234  | -4.372016 | 2.774658  |
| H  | 2.339589  | -3.577671 | 3.805731  |
| H  | 0.593131  | -3.428214 | 4.225613  |
| Fe | -0.450940 | -0.201865 | -0.270413 |

[L<sup>Me</sup>Fe(N<sub>3</sub>Ad)]<sup>‡</sup> (quartet, C<sub>39</sub>H<sub>56</sub>FeN<sub>5</sub>, transition state for N<sub>2</sub> elimination)

|   |           |           |           |
|---|-----------|-----------|-----------|
| N | -2.275565 | -0.528076 | 0.696845  |
| N | 0.324822  | -1.924060 | 0.570298  |
| C | -2.604535 | -1.624879 | 1.390612  |
| C | -0.440554 | -2.924772 | 1.029477  |
| C | -1.738238 | -2.725888 | 1.538116  |
| H | -2.170494 | -3.586782 | 2.043564  |
| N | 0.298717  | 1.549057  | -0.484094 |
| N | -0.550496 | 2.288724  | -1.626026 |
| N | -1.673909 | 2.192518  | -1.820490 |
| C | 1.653925  | 2.124416  | -0.446070 |
| C | 2.365679  | 1.507021  | 0.766805  |
| C | 2.458889  | 1.780302  | -1.718608 |
| C | 1.625831  | 3.660138  | -0.260852 |
| H | 2.395759  | 0.406611  | 0.651584  |
| H | 1.799810  | 1.728988  | 1.699424  |
| C | 3.808200  | 2.046395  | 0.890708  |
| H | 1.963761  | 2.207335  | -2.618043 |
| H | 2.502945  | 0.678769  | -1.855190 |
| C | 3.897466  | 2.332441  | -1.610248 |
| H | 1.056310  | 3.926447  | 0.655918  |
| H | 1.117904  | 4.151916  | -1.118687 |
| C | 3.064363  | 4.213971  | -0.150840 |
| H | 4.306175  | 1.584374  | 1.770445  |
| C | 4.596781  | 1.697318  | -0.389285 |
| C | 3.765814  | 3.578285  | 1.067896  |
| H | 4.462660  | 2.081113  | -2.533953 |

|   |           |           |           |
|---|-----------|-----------|-----------|
| C | 3.847837  | 3.865917  | -1.435548 |
| H | 3.029450  | 5.317950  | -0.024610 |
| H | 4.650980  | 0.593451  | -0.512847 |
| H | 5.640171  | 2.073754  | -0.308925 |
| H | 3.218146  | 3.838047  | 2.000511  |
| H | 4.798432  | 3.979653  | 1.166001  |
| H | 4.880262  | 4.274917  | -1.373724 |
| H | 3.358104  | 4.333239  | -2.318055 |
| C | -3.245296 | 0.440349  | 0.341564  |
| C | -3.361388 | 1.631109  | 1.102241  |
| C | -4.086666 | 0.223301  | -0.782246 |
| C | -4.358804 | 2.562110  | 0.760588  |
| C | -5.060653 | 1.188219  | -1.097082 |
| C | -5.197862 | 2.339937  | -0.327516 |
| H | -4.488633 | 3.469049  | 1.336266  |
| H | -5.719748 | 1.052115  | -1.944377 |
| H | -5.956144 | 3.069717  | -0.580721 |
| C | 1.596643  | -2.163189 | -0.003105 |
| C | 1.718570  | -2.187676 | -1.416426 |
| C | 2.750258  | -2.299203 | 0.820356  |
| C | 2.999903  | -2.290467 | -1.986329 |
| C | 4.011885  | -2.387785 | 0.203816  |
| C | 4.132784  | -2.371091 | -1.182548 |
| H | 3.126671  | -2.321013 | -3.060329 |
| H | 4.911812  | -2.481628 | 0.797086  |
| H | 5.111727  | -2.445848 | -1.638253 |
| C | 0.025068  | -4.373251 | 1.033157  |
| H | 1.002385  | -4.530009 | 0.537618  |
| H | 0.103993  | -4.736417 | 2.079615  |
| H | -0.713423 | -5.001431 | 0.490881  |
| C | -3.962806 | -1.786921 | 2.056264  |
| H | -4.619719 | -0.901525 | 1.949216  |
| H | -4.491358 | -2.660318 | 1.619609  |
| H | -3.822588 | -1.961999 | 3.144036  |
| C | 2.654746  | -2.396527 | 2.343352  |
| C | 3.379640  | -1.239047 | 3.042874  |
| C | 3.198758  | -3.743907 | 2.840601  |
| H | 1.597334  | -2.343145 | 2.672321  |
| H | 2.862674  | -0.283570 | 2.833819  |
| H | 3.361071  | -1.385967 | 4.143990  |
| H | 4.438227  | -1.162356 | 2.717997  |
| H | 2.711472  | -4.582973 | 2.302410  |
| H | 4.296560  | -3.814407 | 2.688763  |
| H | 2.987454  | -3.862499 | 3.924855  |
| C | 0.485745  | -2.198779 | -2.320752 |
| C | 0.371425  | -3.537797 | -3.058857 |
| C | 0.483750  | -1.029126 | -3.311928 |
| H | -0.443549 | -2.095615 | -1.722489 |
| H | 0.370416  | -4.375046 | -2.328187 |
| H | -0.580307 | -3.578026 | -3.630880 |
| H | 1.215394  | -3.678526 | -3.766944 |

|    |           |           |           |
|----|-----------|-----------|-----------|
| H  | 0.444855  | -0.069406 | -2.761978 |
| H  | 1.382230  | -1.041806 | -3.963010 |
| H  | -0.416854 | -1.080588 | -3.960046 |
| C  | -2.444661 | 1.908600  | 2.288567  |
| C  | -3.231673 | 1.886531  | 3.603534  |
| C  | -1.697702 | 3.237821  | 2.118532  |
| H  | -1.664457 | 1.122630  | 2.370376  |
| H  | -3.744232 | 0.908285  | 3.722944  |
| H  | -2.540835 | 2.022815  | 4.462838  |
| H  | -3.992373 | 2.695421  | 3.629013  |
| H  | -1.220724 | 3.280229  | 1.118310  |
| H  | -2.384612 | 4.104158  | 2.220470  |
| H  | -0.902615 | 3.328326  | 2.889240  |
| C  | -3.947107 | -1.018423 | -1.659609 |
| C  | -3.552726 | -0.644985 | -3.093655 |
| C  | -5.233322 | -1.853717 | -1.646213 |
| H  | -3.138584 | -1.677849 | -1.282809 |
| H  | -2.612991 | -0.054848 | -3.087712 |
| H  | -3.375358 | -1.564946 | -3.690940 |
| H  | -4.348479 | -0.050526 | -3.589874 |
| H  | -5.520420 | -2.097181 | -0.601847 |
| H  | -6.071953 | -1.309873 | -2.129805 |
| H  | -5.072163 | -2.807577 | -2.192516 |
| Fe | -0.397589 | -0.088202 | 0.213610  |

**[L<sup>Me</sup>Fe(N<sub>3</sub>Ad)]<sup>‡</sup>** (sextet, C<sub>39</sub>H<sub>56</sub>FeN<sub>5</sub>, transition state for N<sub>2</sub> elimination)

|   |           |           |           |
|---|-----------|-----------|-----------|
| N | 2.315568  | 0.456094  | 0.701291  |
| N | -0.227570 | 1.936704  | 0.568801  |
| C | 2.679748  | 1.544151  | 1.395770  |
| C | 0.570051  | 2.916537  | 1.009513  |
| C | 1.856552  | 2.675695  | 1.532942  |
| H | 2.315435  | 3.523726  | 2.036621  |
| N | -0.473818 | -1.497215 | -0.482445 |
| N | 0.450147  | -2.341452 | -1.618053 |
| N | 1.546488  | -2.111423 | -1.808130 |
| C | -1.824041 | -2.054941 | -0.431485 |
| C | -2.547491 | -1.377797 | 0.743232  |
| C | -2.608131 | -1.762062 | -1.729267 |
| C | -1.811060 | -3.580389 | -0.176320 |
| H | -2.569178 | -0.283248 | 0.579874  |
| H | -1.995454 | -1.564640 | 1.691596  |
| C | -3.995650 | -1.899368 | 0.870932  |
| H | -2.103421 | -2.234120 | -2.600504 |
| H | -2.639533 | -0.667055 | -1.917313 |
| C | -4.052814 | -2.297105 | -1.616042 |
| H | -1.256051 | -3.808504 | 0.759676  |
| H | -1.294940 | -4.113619 | -1.003836 |
| C | -3.255722 | -4.117497 | -0.061746 |
| H | -4.500662 | -1.393259 | 1.722174  |
| C | -4.763128 | -1.601539 | -0.434771 |

|   |           |           |           |
|---|-----------|-----------|-----------|
| C | -3.968727 | -3.422100 | 1.117155  |
| H | -4.603222 | -2.083468 | -2.557971 |
| C | -4.018694 | -3.821537 | -1.371644 |
| H | -3.231807 | -5.214901 | 0.114440  |
| H | -4.805236 | -0.503571 | -0.608629 |
| H | -5.810921 | -1.965117 | -0.352453 |
| H | -3.436356 | -3.644029 | 2.068211  |
| H | -5.005996 | -3.810475 | 1.218378  |
| H | -5.055335 | -4.219097 | -1.305881 |
| H | -3.521039 | -4.332163 | -2.225253 |
| C | 3.257304  | -0.536993 | 0.339803  |
| C | 3.324359  | -1.743461 | 1.081466  |
| C | 4.115280  | -0.332531 | -0.774325 |
| C | 4.289548  | -2.704770 | 0.731392  |
| C | 5.056785  | -1.326707 | -1.096914 |
| C | 5.145430  | -2.495250 | -0.345949 |
| H | 4.381341  | -3.625409 | 1.292467  |
| H | 5.727560  | -1.200938 | -1.936610 |
| H | 5.878808  | -3.247914 | -0.605460 |
| C | -1.489080 | 2.210422  | -0.012795 |
| C | -1.609435 | 2.207759  | -1.426758 |
| C | -2.635918 | 2.418078  | 0.805513  |
| C | -2.883110 | 2.367967  | -2.000726 |
| C | -3.891232 | 2.555696  | 0.185047  |
| C | -4.011259 | 2.520300  | -1.200849 |
| H | -3.007505 | 2.387498  | -3.075148 |
| H | -4.786282 | 2.703304  | 0.774739  |
| H | -4.984695 | 2.636126  | -1.659774 |
| C | 0.163394  | 4.382311  | 0.978038  |
| H | -0.804310 | 4.566750  | 0.473100  |
| H | 0.094032  | 4.771868  | 2.015613  |
| H | 0.929824  | 4.967561  | 0.426630  |
| C | 4.036299  | 1.653901  | 2.075113  |
| H | 4.658037  | 0.742400  | 1.976974  |
| H | 4.603537  | 2.505008  | 1.643174  |
| H | 3.891722  | 1.836596  | 3.161072  |
| C | -2.539238 | 2.530904  | 2.327137  |
| C | -3.319087 | 1.416686  | 3.037296  |
| C | -3.021480 | 3.907845  | 2.806642  |
| H | -1.486327 | 2.431963  | 2.659973  |
| H | -2.858111 | 0.433888  | 2.824011  |
| H | -3.281049 | 1.565348  | 4.137675  |
| H | -4.383545 | 1.397725  | 2.723124  |
| H | -2.495426 | 4.716912  | 2.259175  |
| H | -4.114623 | 4.027002  | 2.651668  |
| H | -2.806674 | 4.029746  | 3.889835  |
| C | -0.377601 | 2.132959  | -2.329167 |
| C | -0.166766 | 3.463777  | -3.060082 |
| C | -0.458205 | 0.972034  | -3.327885 |
| H | 0.540169  | 1.958263  | -1.729572 |
| H | -0.096969 | 4.293783  | -2.324561 |

|    |           |           |           |
|----|-----------|-----------|-----------|
| H  | 0.781134  | 3.435183  | -3.639148 |
| H  | -1.003524 | 3.672561  | -3.760038 |
| H  | -0.527839 | 0.010370  | -2.785292 |
| H  | -1.331505 | 1.072649  | -4.004877 |
| H  | 0.461097  | 0.941780  | -3.950437 |
| C  | 2.390169  | -2.006104 | 2.257653  |
| C  | 3.170006  | -2.043912 | 3.576596  |
| C  | 1.588606  | -3.298586 | 2.056504  |
| H  | 1.643478  | -1.189765 | 2.352839  |
| H  | 3.724643  | -1.091656 | 3.716991  |
| H  | 2.468977  | -2.165581 | 4.429823  |
| H  | 3.893895  | -2.886141 | 3.590545  |
| H  | 1.105846  | -3.294650 | 1.057994  |
| H  | 2.239660  | -4.194737 | 2.132454  |
| H  | 0.793393  | -3.376630 | 2.828446  |
| C  | 4.026631  | 0.925430  | -1.635204 |
| C  | 3.633235  | 0.586047  | -3.078038 |
| C  | 5.341002  | 1.715126  | -1.599488 |
| H  | 3.237712  | 1.606881  | -1.256389 |
| H  | 2.676437  | 0.024491  | -3.089098 |
| H  | 3.488811  | 1.520016  | -3.662330 |
| H  | 4.414820  | -0.024576 | -3.577151 |
| H  | 5.629913  | 1.930779  | -0.549687 |
| H  | 6.163482  | 1.150540  | -2.087064 |
| H  | 5.216756  | 2.683020  | -2.130536 |
| Fe | 0.430082  | 0.054104  | 0.244066  |

[L<sup>Me</sup>Fe(py)(N<sub>3</sub>Ad)]<sup>‡</sup> (quartet, C<sub>44</sub>H<sub>61</sub>FeN<sub>6</sub>, transition state for N<sub>2</sub> elimination)

|   |           |           |           |
|---|-----------|-----------|-----------|
| N | 2.393588  | 0.339762  | 0.411340  |
| N | -0.192099 | 1.724910  | 0.976377  |
| C | 2.805549  | 1.191453  | 1.359226  |
| C | 0.633485  | 2.506794  | 1.671048  |
| C | 1.962964  | 2.134867  | 1.984066  |
| H | 2.456321  | 2.780324  | 2.708854  |
| N | -0.554121 | -1.144897 | -1.172758 |
| N | 0.339235  | -1.484262 | -2.480506 |
| N | 1.476556  | -1.418358 | -2.584890 |
| C | -1.948705 | -1.531347 | -1.495683 |
| C | -2.815999 | -1.278509 | -0.249576 |
| C | -2.528128 | -0.690931 | -2.657931 |
| C | -2.050430 | -3.033823 | -1.859737 |
| H | -2.762223 | -0.211598 | 0.033477  |
| H | -2.443243 | -1.871417 | 0.606089  |
| C | -4.288861 | -1.663832 | -0.508829 |
| H | -1.927143 | -0.828658 | -3.582845 |
| H | -2.497333 | 0.385771  | -2.393882 |
| C | -3.994583 | -1.086832 | -2.939483 |
| H | -1.644192 | -3.657800 | -1.034326 |
| H | -1.448202 | -3.262218 | -2.765614 |
| C | -3.519442 | -3.427599 | -2.131846 |

|   |           |           |           |
|---|-----------|-----------|-----------|
| H | -4.890247 | -1.468927 | 0.405867  |
| C | -4.842665 | -0.824192 | -1.677961 |
| C | -4.365805 | -3.161972 | -0.869094 |
| H | -4.388017 | -0.479378 | -3.783383 |
| C | -4.064706 | -2.585003 | -3.305054 |
| H | -3.572745 | -4.506752 | -2.393619 |
| H | -4.813909 | 0.256194  | -1.417474 |
| H | -5.905202 | -1.090836 | -1.869788 |
| H | -3.988953 | -3.776888 | -0.022226 |
| H | -5.422876 | -3.457020 | -1.049495 |
| H | -5.116124 | -2.874010 | -3.524183 |
| H | -3.468566 | -2.780230 | -4.223517 |
| C | 3.336735  | -0.277713 | -0.458937 |
| C | 3.758769  | -1.616605 | -0.227640 |
| C | 3.903010  | 0.461901  | -1.537081 |
| C | 4.712346  | -2.193174 | -1.086869 |
| C | 4.864896  | -0.153692 | -2.359131 |
| C | 5.256998  | -1.467822 | -2.138761 |
| H | 5.051019  | -3.209699 | -0.936038 |
| H | 5.318032  | 0.385172  | -3.180678 |
| H | 5.995649  | -1.925691 | -2.784169 |
| C | -1.489518 | 2.166303  | 0.607417  |
| C | -1.699325 | 2.741043  | -0.674557 |
| C | -2.584873 | 2.009654  | 1.505094  |
| C | -3.009465 | 3.075213  | -1.064293 |
| C | -3.878471 | 2.339802  | 1.061755  |
| C | -4.086041 | 2.855812  | -0.212328 |
| H | -3.202859 | 3.525945  | -2.028567 |
| H | -4.735176 | 2.211148  | 1.709946  |
| H | -5.087393 | 3.113768  | -0.532283 |
| C | 0.225233  | 3.877949  | 2.193704  |
| H | -0.790368 | 4.192354  | 1.885333  |
| H | 0.259765  | 3.877723  | 3.303712  |
| H | 0.932438  | 4.645080  | 1.812644  |
| C | 4.245685  | 1.214240  | 1.854893  |
| H | 4.901715  | 0.477587  | 1.352157  |
| H | 4.682648  | 2.222610  | 1.698403  |
| H | 4.264419  | 0.984474  | 2.941376  |
| C | -2.393822 | 1.532176  | 2.942330  |
| C | -3.097844 | 0.194030  | 3.195181  |
| C | -2.870330 | 2.590913  | 3.946543  |
| H | -1.321644 | 1.370719  | 3.156121  |
| H | -2.675560 | -0.586683 | 2.534872  |
| H | -2.933390 | -0.130950 | 4.244801  |
| H | -4.190717 | 0.269560  | 3.015246  |
| H | -2.385304 | 3.567243  | 3.736894  |
| H | -3.971982 | 2.722225  | 3.902507  |
| H | -2.596276 | 2.285019  | 4.978892  |
| C | -0.532479 | 3.102723  | -1.590136 |
| C | -0.424342 | 4.624609  | -1.746799 |
| C | -0.635668 | 2.418968  | -2.960300 |

|    |           |           |           |
|----|-----------|-----------|-----------|
| H  | 0.425909  | 2.769110  | -1.146678 |
| H  | -0.363837 | 5.107067  | -0.747719 |
| H  | 0.496936  | 4.885346  | -2.310627 |
| H  | -1.300474 | 5.034265  | -2.292694 |
| H  | -0.437950 | 1.333632  | -2.851567 |
| H  | -1.630971 | 2.568616  | -3.426170 |
| H  | 0.123277  | 2.829334  | -3.657321 |
| C  | 3.237381  | -2.433381 | 0.944780  |
| C  | 4.366889  | -2.807960 | 1.912750  |
| C  | 2.497016  | -3.685495 | 0.457098  |
| H  | 2.520098  | -1.835714 | 1.533191  |
| H  | 4.900005  | -1.894039 | 2.250064  |
| H  | 3.945444  | -3.311516 | 2.809058  |
| H  | 5.097372  | -3.494848 | 1.435939  |
| H  | 1.684767  | -3.398418 | -0.244169 |
| H  | 3.184895  | -4.385330 | -0.061962 |
| H  | 2.045362  | -4.220836 | 1.318982  |
| C  | 3.500471  | 1.903274  | -1.828471 |
| C  | 2.918864  | 2.042608  | -3.240223 |
| C  | 4.685400  | 2.858044  | -1.636616 |
| H  | 2.708481  | 2.235377  | -1.129834 |
| H  | 2.091043  | 1.317332  | -3.383430 |
| H  | 2.521459  | 3.069754  | -3.383843 |
| H  | 3.689665  | 1.859264  | -4.017730 |
| H  | 5.117270  | 2.735522  | -0.622306 |
| H  | 5.481680  | 2.666966  | -2.386738 |
| H  | 4.345811  | 3.910440  | -1.743770 |
| Fe | 0.389796  | -0.112773 | 0.213410  |
| N  | 0.092332  | -1.374340 | 2.027271  |
| C  | 0.380406  | -0.842190 | 3.227655  |
| C  | -0.299106 | -2.658354 | 1.989429  |
| C  | 0.256239  | -1.551208 | 4.416446  |
| H  | 0.734072  | 0.181950  | 3.222799  |
| C  | -0.455241 | -3.437296 | 3.129197  |
| H  | -0.475723 | -3.065214 | 1.001430  |
| C  | -0.178914 | -2.872144 | 4.370466  |
| H  | 0.499777  | -1.069121 | 5.356246  |
| H  | -0.779868 | -4.467218 | 3.035791  |
| H  | -0.291426 | -3.451287 | 5.280982  |

$[\text{L}^{\text{Me}}\text{Fe}(\text{py})(\text{N}_3\text{Ad})]^\ddagger$  (sextet,  $\text{C}_{44}\text{H}_{61}\text{FeN}_6$ , transition state for  $\text{N}_2$  elimination)

|   |           |           |           |
|---|-----------|-----------|-----------|
| N | 2.422099  | 0.293210  | 0.403627  |
| N | -0.122653 | 1.728849  | 0.972297  |
| C | 2.852345  | 1.128613  | 1.360702  |
| C | 0.715890  | 2.496798  | 1.662338  |
| C | 2.036323  | 2.093775  | 1.981712  |
| H | 2.542396  | 2.725972  | 2.709351  |
| N | -0.655693 | -1.108659 | -1.157269 |
| N | 0.286505  | -1.498993 | -2.500205 |
| N | 1.413991  | -1.355566 | -2.550727 |



|   |           |           |           |
|---|-----------|-----------|-----------|
| C | -2.044236 | -1.479904 | -1.478871 |
| C | -2.910443 | -1.211968 | -0.234002 |
| C | -2.609369 | -0.636527 | -2.645573 |
| C | -2.164485 | -2.982276 | -1.837828 |
| H | -2.843732 | -0.144580 | 0.046348  |
| H | -2.545052 | -1.807655 | 0.623923  |
| C | -4.387477 | -1.578625 | -0.495494 |
| H | -2.007484 | -0.788472 | -3.567731 |
| H | -2.561934 | 0.441499  | -2.387890 |
| C | -4.080658 | -1.013195 | -2.927864 |
| H | -1.768196 | -3.608855 | -1.009606 |
| H | -1.563539 | -3.221243 | -2.741688 |
| C | -3.638147 | -3.357507 | -2.111622 |
| H | -4.988302 | -1.373083 | 0.417216  |
| C | -4.927112 | -0.734786 | -1.668439 |
| C | -4.483436 | -3.076721 | -0.851437 |
| H | -4.464459 | -0.403392 | -3.774488 |
| C | -4.170316 | -2.511568 | -3.288498 |
| H | -3.705174 | -4.436695 | -2.370074 |
| H | -4.883502 | 0.346061  | -1.411090 |
| H | -5.992942 | -0.987062 | -1.861420 |
| H | -4.116482 | -3.693978 | -0.001929 |
| H | -5.543962 | -3.358283 | -1.033107 |
| H | -5.225176 | -2.787177 | -3.508340 |
| H | -3.575447 | -2.717902 | -4.205356 |
| C | 3.352893  | -0.340062 | -0.466869 |
| C | 3.729863  | -1.694589 | -0.251565 |
| C | 3.942420  | 0.393641  | -1.536233 |
| C | 4.663761  | -2.292150 | -1.117893 |
| C | 4.884934  | -0.242676 | -2.364803 |
| C | 5.233569  | -1.571789 | -2.160178 |
| H | 4.966781  | -3.321757 | -0.980442 |
| H | 5.354433  | 0.290765  | -3.180718 |
| H | 5.956769  | -2.045969 | -2.811273 |
| C | -1.413092 | 2.190657  | 0.604466  |
| C | -1.617631 | 2.755188  | -0.682770 |
| C | -2.505951 | 2.068127  | 1.510359  |
| C | -2.921467 | 3.119574  | -1.066532 |
| C | -3.793827 | 2.427345  | 1.072770  |
| C | -3.997170 | 2.936356  | -0.204877 |
| H | -3.110294 | 3.565219  | -2.034035 |
| H | -4.649075 | 2.325842  | 1.727666  |
| H | -4.993886 | 3.216603  | -0.520527 |
| C | 0.339917  | 3.881831  | 2.172079  |
| H | -0.666523 | 4.218225  | 1.856707  |
| H | 0.370820  | 3.890096  | 3.282134  |
| H | 1.067356  | 4.627852  | 1.787270  |
| C | 4.288220  | 1.101898  | 1.867892  |
| H | 4.921351  | 0.341044  | 1.371793  |
| H | 4.761500  | 2.093995  | 1.713068  |
| H | 4.290461  | 0.873440  | 2.954832  |

|    |           |           |           |
|----|-----------|-----------|-----------|
| C  | -2.317651 | 1.594084  | 2.949279  |
| C  | -3.053784 | 0.275677  | 3.213766  |
| C  | -2.761173 | 2.669914  | 3.950415  |
| H  | -1.248488 | 1.405596  | 3.157519  |
| H  | -2.655685 | -0.518475 | 2.554465  |
| H  | -2.890507 | -0.048259 | 4.263896  |
| H  | -4.145580 | 0.377996  | 3.040631  |
| H  | -2.254067 | 3.632915  | 3.731813  |
| H  | -3.859560 | 2.827915  | 3.912964  |
| H  | -2.487640 | 2.363250  | 4.982669  |
| C  | -0.448466 | 3.073283  | -1.611573 |
| C  | -0.295202 | 4.589697  | -1.781862 |
| C  | -0.585056 | 2.382265  | -2.975078 |
| H  | 0.503243  | 2.712931  | -1.174281 |
| H  | -0.208090 | 5.077699  | -0.787463 |
| H  | 0.626895  | 4.817528  | -2.358405 |
| H  | -1.164843 | 5.021917  | -2.320721 |
| H  | -0.438011 | 1.290122  | -2.856673 |
| H  | -1.573097 | 2.573537  | -3.441134 |
| H  | 0.191304  | 2.751224  | -3.676230 |
| C  | 3.178923  | -2.507031 | 0.910541  |
| C  | 4.294843  | -2.944006 | 1.868146  |
| C  | 2.383671  | -3.718211 | 0.406893  |
| H  | 2.489860  | -1.888933 | 1.511659  |
| H  | 4.869666  | -2.059018 | 2.214221  |
| H  | 3.855213  | -3.439681 | 2.760104  |
| H  | 4.991757  | -3.656853 | 1.379412  |
| H  | 1.576746  | -3.384607 | -0.279765 |
| H  | 3.037850  | -4.434630 | -0.132802 |
| H  | 1.918357  | -4.251144 | 1.263048  |
| C  | 3.579773  | 1.848247  | -1.815109 |
| C  | 2.999210  | 2.014661  | -3.224395 |
| C  | 4.790859  | 2.768243  | -1.617491 |
| H  | 2.798323  | 2.197059  | -1.112609 |
| H  | 2.159082  | 1.305339  | -3.375089 |
| H  | 2.617874  | 3.049691  | -3.355379 |
| H  | 3.766189  | 1.826767  | -4.004686 |
| H  | 5.218914  | 2.627040  | -0.603891 |
| H  | 5.581497  | 2.559816  | -2.368942 |
| H  | 4.480760  | 3.830365  | -1.717851 |
| Fe | 0.423154  | -0.129492 | 0.207362  |
| N  | 0.079874  | -1.378328 | 2.041251  |
| C  | 0.388782  | -0.859931 | 3.241987  |
| C  | -0.382484 | -2.637754 | 2.001725  |
| C  | 0.219552  | -1.559296 | 4.431079  |
| H  | 0.793305  | 0.145495  | 3.237101  |
| C  | -0.587988 | -3.405635 | 3.141486  |
| H  | -0.577895 | -3.032659 | 1.012330  |
| C  | -0.287084 | -2.854627 | 4.383402  |
| H  | 0.482501  | -1.090074 | 5.372183  |
| H  | -0.969327 | -4.415969 | 3.048077  |

H -0.436385 -3.425481 5.293909

**L<sup>Me</sup>FeNNFeL<sup>Me</sup>** (septet, C<sub>58</sub>H<sub>82</sub>Fe<sub>2</sub>N<sub>6</sub>)

|    |           |           |           |
|----|-----------|-----------|-----------|
| Fe | 2.070945  | -0.457611 | 1.006601  |
| N  | 3.596547  | -1.513333 | 0.376250  |
| N  | 0.725643  | 0.275417  | 0.090204  |
| C  | 4.459055  | -1.843718 | 2.609630  |
| H  | 5.305674  | -2.257461 | 3.153582  |
| C  | 3.541470  | -1.836574 | -1.000021 |
| C  | 4.489980  | -2.057874 | 1.212222  |
| N  | 2.346054  | -0.712854 | 2.920713  |
| C  | 3.469527  | -1.245733 | 3.421064  |
| C  | 1.070815  | 1.092026  | 3.978099  |
| C  | 1.267407  | -0.290997 | 3.733766  |
| C  | 3.760029  | -1.254203 | 4.912330  |
| H  | 2.985126  | -0.740077 | 5.514693  |
| H  | 4.724245  | -0.738060 | 5.105764  |
| H  | 3.835096  | -2.302468 | 5.270913  |
| C  | 0.430313  | -2.719248 | 3.855023  |
| H  | 1.331049  | -2.914051 | 3.237915  |
| C  | 5.620901  | -2.946286 | 0.720377  |
| H  | 5.612686  | -3.109675 | -0.374948 |
| H  | 5.548537  | -3.942011 | 1.206992  |
| H  | 6.596697  | -2.486385 | 0.984415  |
| C  | 0.328990  | -1.240359 | 4.216529  |
| C  | 4.293978  | -1.086317 | -1.939330 |
| C  | -0.011160 | 1.495152  | 4.781546  |
| H  | -0.175626 | 2.541356  | 5.003593  |
| C  | 2.654043  | -2.850284 | -1.443546 |
| C  | -0.742942 | -0.793286 | 5.010493  |
| H  | -1.473757 | -1.491480 | 5.396677  |
| C  | -0.902423 | 0.559315  | 5.296751  |
| H  | -1.736526 | 0.887156  | 5.903719  |
| C  | 2.002798  | 2.144623  | 3.388434  |
| H  | 2.759014  | 1.670707  | 2.727850  |
| C  | 1.764264  | -3.612147 | -0.465904 |
| H  | 1.872634  | -3.207478 | 0.562210  |
| C  | 4.197647  | -1.413535 | -3.304437 |
| H  | 4.759640  | -0.861761 | -4.046337 |
| C  | 3.364309  | -2.442428 | -3.733731 |
| H  | 3.298969  | -2.678927 | -4.787979 |
| C  | 2.779740  | 2.866648  | 4.494752  |
| H  | 3.509336  | 3.574873  | 4.047168  |
| H  | 3.342389  | 2.128587  | 5.105870  |
| H  | 2.096098  | 3.436547  | 5.159101  |
| C  | 5.170779  | 0.082632  | -1.505291 |
| H  | 5.148421  | 0.200562  | -0.401899 |
| C  | 0.567823  | -3.591856 | 5.108475  |
| H  | 0.757222  | -4.647002 | 4.816824  |
| H  | -0.354101 | -3.559663 | 5.726261  |

|    |           |           |           |
|----|-----------|-----------|-----------|
| H  | 1.424668  | -3.243191 | 5.723163  |
| C  | 2.167286  | -5.088845 | -0.397943 |
| H  | 3.239403  | -5.176133 | -0.119319 |
| H  | 2.007071  | -5.593589 | -1.374206 |
| H  | 1.564312  | -5.612237 | 0.374685  |
| C  | 0.280883  | -3.462770 | -0.827927 |
| H  | 0.015693  | -2.388309 | -0.923265 |
| H  | -0.351547 | -3.909031 | -0.031724 |
| H  | 0.046113  | -3.977523 | -1.782111 |
| C  | -0.767437 | -3.158574 | 3.004239  |
| H  | -0.639974 | -4.214500 | 2.683186  |
| H  | -0.834506 | -2.527229 | 2.092733  |
| H  | -1.718450 | -3.073758 | 3.571256  |
| C  | 1.232908  | 3.144394  | 2.513553  |
| H  | 0.615510  | 2.604926  | 1.764363  |
| H  | 1.945302  | 3.800103  | 1.968963  |
| H  | 0.568259  | 3.787902  | 3.126739  |
| C  | 4.650624  | 1.401748  | -2.089905 |
| H  | 3.591151  | 1.556387  | -1.792347 |
| H  | 4.715879  | 1.405142  | -3.198528 |
| H  | 5.247628  | 2.253162  | -1.698956 |
| C  | 6.638272  | -0.149705 | -1.885754 |
| H  | 7.271538  | 0.661211  | -1.466707 |
| H  | 6.772606  | -0.164487 | -2.987771 |
| H  | 6.992068  | -1.115859 | -1.467327 |
| Fe | -1.691334 | 1.233690  | -1.330713 |
| N  | -3.050245 | 2.537549  | -0.788144 |
| N  | -0.214123 | 0.703018  | -0.480171 |
| C  | -4.381173 | 2.173178  | -2.772073 |
| H  | -5.260848 | 2.538073  | -3.298227 |
| C  | -2.881526 | 3.028584  | 0.527916  |
| C  | -4.150161 | 2.775789  | -1.513801 |
| N  | -2.611638 | 0.532261  | -2.900835 |
| C  | -3.697414 | 1.121399  | -3.421099 |
| C  | -2.594616 | -1.911367 | -3.134015 |
| C  | -2.039683 | -0.642313 | -3.444654 |
| C  | -4.283682 | 0.691151  | -4.755084 |
| H  | -3.699131 | -0.105427 | -5.256483 |
| H  | -5.317544 | 0.315394  | -4.603378 |
| H  | -4.314839 | 1.561055  | -5.444886 |
| C  | -0.173936 | 0.785425  | -4.480518 |
| H  | -0.699060 | 1.602674  | -3.942767 |
| C  | -5.238936 | 3.726544  | -1.043903 |
| H  | -5.039923 | 4.172743  | -0.050019 |
| H  | -5.344707 | 4.559216  | -1.771143 |
| H  | -6.204170 | 3.181153  | -0.977859 |
| C  | -0.852314 | -0.553825 | -4.215014 |
| C  | -3.231438 | 2.206433  | 1.629477  |
| C  | -1.998279 | -3.064894 | -3.675368 |
| H  | -2.398517 | -4.046928 | -3.460626 |
| C  | -2.275910 | 4.292501  | 0.745143  |

|   |           |           |           |
|---|-----------|-----------|-----------|
| C | -0.291963 | -1.731829 | -4.741339 |
| H | 0.601638  | -1.695139 | -5.350455 |
| C | -0.865570 | -2.971800 | -4.478623 |
| H | -0.415274 | -3.869799 | -4.881684 |
| C | -3.786741 | -2.053396 | -2.192373 |
| H | -4.149150 | -1.058791 | -1.861427 |
| C | -2.096144 | 4.742225  | 2.066237  |
| H | -1.638783 | 5.702202  | 2.266176  |
| C | -1.786839 | 5.151025  | -0.415625 |
| H | -2.014260 | 4.663562  | -1.386473 |
| C | -3.044907 | 2.699212  | 2.933660  |
| H | -3.321982 | 2.105075  | 3.794480  |
| C | -2.486157 | 3.955614  | 3.146286  |
| H | -2.337359 | 4.314898  | 4.156441  |
| C | -4.970383 | -2.734954 | -2.889494 |
| H | -5.860634 | -2.721253 | -2.225016 |
| H | -5.226788 | -2.191307 | -3.823457 |
| H | -4.737640 | -3.791007 | -3.140925 |
| C | -3.800157 | 0.805160  | 1.427231  |
| H | -3.816572 | 0.538872  | 0.349571  |
| C | -0.227259 | 1.137959  | -5.971078 |
| H | 0.200975  | 2.149324  | -6.138357 |
| H | 0.347451  | 0.406204  | -6.577506 |
| H | -1.281920 | 1.145252  | -6.320962 |
| C | -2.493635 | 6.511962  | -0.439026 |
| H | -3.594946 | 6.369076  | -0.459468 |
| H | -2.226615 | 7.121373  | 0.449810  |
| H | -2.201079 | 7.075502  | -1.350641 |
| C | -0.263310 | 5.320464  | -0.365373 |
| H | 0.228807  | 4.324114  | -0.362343 |
| H | 0.087671  | 5.876964  | -1.260516 |
| H | 0.050777  | 5.878356  | 0.542049  |
| C | 1.272327  | 0.790329  | -3.964739 |
| H | 1.692597  | 1.817063  | -4.021564 |
| H | 1.304427  | 0.460348  | -2.904751 |
| H | 1.917249  | 0.117576  | -4.567483 |
| C | -3.389901 | -2.804461 | -0.915704 |
| H | -2.545750 | -2.281806 | -0.417486 |
| H | -4.245312 | -2.830223 | -0.207245 |
| H | -3.084640 | -3.848400 | -1.139590 |
| C | -2.929989 | -0.255186 | 2.114404  |
| H | -1.873099 | -0.154223 | 1.787804  |
| H | -2.976242 | -0.159272 | 3.218612  |
| H | -3.283779 | -1.271967 | 1.842249  |
| C | -5.249807 | 0.728299  | 1.917436  |
| H | -5.674894 | -0.273032 | 1.691369  |
| H | -5.312404 | 0.900517  | 3.012854  |
| H | -5.866291 | 1.492467  | 1.397168  |
| C | 2.596727  | -3.152778 | -2.816039 |
| H | 1.946119  | -3.935427 | -3.183394 |

**L<sup>Me</sup>Fe** (quartet, C<sub>29</sub>H<sub>41</sub>FeN<sub>2</sub>, iron(I)-β-diketimate fragment)

|    |           |           |           |
|----|-----------|-----------|-----------|
| Fe | -0.007418 | -0.198309 | -0.720221 |
| N  | -1.573508 | -0.295047 | 0.385272  |
| N  | 1.529556  | -0.375222 | 0.414516  |
| C  | -1.320444 | -0.321254 | 1.709077  |
| C  | -0.040471 | -0.579758 | 2.263453  |
| H  | -0.057469 | -0.723878 | 3.343210  |
| C  | 1.265403  | -0.596715 | 1.715083  |
| C  | -2.833529 | 0.070731  | -0.144812 |
| C  | -3.057507 | 1.411119  | -0.549850 |
| C  | -4.317283 | 1.764233  | -1.066699 |
| H  | -4.525487 | 2.782352  | -1.368300 |
| C  | -5.323126 | 0.812080  | -1.204175 |
| H  | -6.285559 | 1.099592  | -1.607696 |
| C  | -5.093988 | -0.510144 | -0.834637 |
| H  | -5.891659 | -1.228898 | -0.968762 |
| C  | -3.851945 | -0.905230 | -0.304823 |
| C  | -1.970709 | 2.474493  | -0.418383 |
| H  | -1.033664 | 2.032913  | -0.020258 |
| C  | -1.612504 | 3.075317  | -1.783266 |
| H  | -1.304092 | 2.269334  | -2.483001 |
| H  | -0.764588 | 3.784502  | -1.676139 |
| H  | -2.471956 | 3.624478  | -2.221808 |
| C  | -2.386915 | 3.566567  | 0.573443  |
| H  | -2.639534 | 3.110474  | 1.554758  |
| H  | -3.266971 | 4.133043  | 0.202282  |
| H  | -1.548198 | 4.278746  | 0.728228  |
| C  | -3.621531 | -2.367952 | 0.061123  |
| H  | -2.602100 | -2.511578 | 0.475533  |
| C  | -3.711781 | -3.264564 | -1.179742 |
| H  | -2.994931 | -2.915096 | -1.953417 |
| H  | -4.735954 | -3.256493 | -1.609035 |
| H  | -3.450504 | -4.310927 | -0.912835 |
| C  | -4.601326 | -2.833294 | 1.146144  |
| H  | -4.343219 | -3.863062 | 1.473559  |
| H  | -5.646599 | -2.836987 | 0.771773  |
| H  | -4.540109 | -2.164457 | 2.030169  |
| C  | 2.830049  | -0.106098 | -0.072320 |
| C  | 3.623938  | -1.160650 | -0.591240 |
| C  | 4.912412  | -0.867346 | -1.073942 |
| H  | 5.545277  | -1.649973 | -1.471338 |
| C  | 5.400789  | 0.436070  | -1.054801 |
| H  | 6.394694  | 0.644550  | -1.429482 |
| C  | 4.613178  | 1.474164  | -0.565184 |
| H  | 5.017963  | 2.477693  | -0.573094 |
| C  | 3.317517  | 1.225975  | -0.076945 |
| C  | 3.109376  | -2.595599 | -0.638651 |
| H  | 2.083944  | -2.657660 | -0.217938 |
| C  | 3.013360  | -3.098428 | -2.084228 |
| H  | 2.379361  | -2.410660 | -2.683873 |

|   |           |           |           |
|---|-----------|-----------|-----------|
| H | 2.547152  | -4.106663 | -2.105937 |
| H | 4.016721  | -3.165182 | -2.555388 |
| C | 3.982698  | -3.527499 | 0.210821  |
| H | 4.045442  | -3.147174 | 1.252370  |
| H | 5.009290  | -3.608480 | -0.204432 |
| H | 3.535401  | -4.544000 | 0.240868  |
| C | 2.468043  | 2.387266  | 0.431280  |
| H | 1.471558  | 2.030381  | 0.763932  |
| C | 2.202699  | 3.408792  | -0.681043 |
| H | 1.741653  | 2.904055  | -1.556946 |
| H | 3.141043  | 3.906225  | -1.004896 |
| H | 1.498254  | 4.188439  | -0.319835 |
| C | 3.117243  | 3.053670  | 1.649838  |
| H | 3.301877  | 2.297247  | 2.442363  |
| H | 2.439705  | 3.830835  | 2.063712  |
| H | 4.081107  | 3.534559  | 1.380156  |
| C | -2.417394 | -0.088509 | 2.737618  |
| H | -2.540836 | -0.997791 | 3.363265  |
| H | -2.136413 | 0.763304  | 3.392765  |
| H | -3.402697 | 0.151612  | 2.293430  |
| C | 2.379213  | -0.857006 | 2.716811  |
| H | 2.375616  | -0.062501 | 3.492841  |
| H | 2.216348  | -1.840440 | 3.206542  |
| H | 3.387895  | -0.877092 | 2.260194  |

**L<sup>Me</sup>Fe( $\mu$ -N<sub>3</sub>Ad)FeL<sup>Me</sup>** (septet, C<sub>68</sub>H<sub>97</sub>Fe<sub>2</sub>N<sub>7</sub>)

|    |           |           |           |
|----|-----------|-----------|-----------|
| Fe | -2.224127 | 0.132111  | 0.312739  |
| Fe | 1.554716  | -0.740415 | 0.247451  |
| N  | -3.889874 | -0.884114 | 0.324012  |
| N  | -3.019035 | 1.818195  | 0.789865  |
| C  | -4.909087 | -0.522271 | 1.116918  |
| C  | -5.013931 | 0.767907  | 1.658416  |
| H  | -5.889867 | 0.950530  | 2.276797  |
| C  | -4.221249 | 1.897595  | 1.372688  |
| C  | -3.974775 | -2.050404 | -0.484442 |
| C  | -4.722300 | -2.025017 | -1.696553 |
| C  | -4.886195 | -3.218164 | -2.423742 |
| H  | -5.462371 | -3.234575 | -3.339278 |
| C  | -4.322856 | -4.407602 | -1.979914 |
| H  | -4.465145 | -5.317137 | -2.549316 |
| C  | -3.581113 | -4.434942 | -0.805674 |
| H  | -3.171950 | -5.382994 | -0.483368 |
| C  | -3.383450 | -3.266038 | -0.046112 |
| C  | -5.366093 | -0.746647 | -2.223203 |
| H  | -5.102560 | 0.114759  | -1.577995 |
| C  | -4.863155 | -0.410307 | -3.633886 |
| H  | -5.238676 | 0.586740  | -3.944701 |
| H  | -5.213082 | -1.155182 | -4.378734 |
| H  | -3.755541 | -0.389032 | -3.651307 |
| C  | -6.895767 | -0.853766 | -2.211593 |

|   |           |           |           |
|---|-----------|-----------|-----------|
| H | -7.346302 | 0.119791  | -2.500777 |
| H | -7.255399 | -1.112259 | -1.195035 |
| H | -7.249700 | -1.631118 | -2.921405 |
| C | -2.595378 | -3.352141 | 1.254172  |
| H | -2.485704 | -2.345747 | 1.705773  |
| C | -1.175597 | -3.878203 | 1.010497  |
| H | -0.619316 | -3.162747 | 0.372830  |
| H | -1.177707 | -4.872099 | 0.518410  |
| H | -0.635610 | -3.988075 | 1.973045  |
| C | -3.328012 | -4.223471 | 2.281611  |
| H | -4.351184 | -3.830349 | 2.456776  |
| H | -2.784654 | -4.209364 | 3.249867  |
| H | -3.401535 | -5.276097 | 1.935473  |
| C | -2.304363 | 2.989850  | 0.407990  |
| C | -1.543951 | 3.724053  | 1.363860  |
| C | -0.927200 | 4.925234  | 0.968739  |
| H | -0.336313 | 5.501264  | 1.668438  |
| C | -1.066384 | 5.407328  | -0.326308 |
| H | -0.597567 | 6.341795  | -0.606725 |
| C | -1.804832 | 4.695196  | -1.262556 |
| H | -1.904655 | 5.112336  | -2.254792 |
| C | -2.404762 | 3.466862  | -0.927502 |
| C | -1.384571 | 3.256084  | 2.804094  |
| H | -1.988902 | 2.346489  | 2.978813  |
| C | 0.077234  | 2.898445  | 3.103744  |
| H | 0.424904  | 2.092016  | 2.425176  |
| H | 0.169769  | 2.538198  | 4.148857  |
| H | 0.742485  | 3.778710  | 2.979507  |
| C | -1.897652 | 4.304995  | 3.801363  |
| H | -1.911536 | 3.875946  | 4.826137  |
| H | -2.931506 | 4.613540  | 3.543173  |
| H | -1.249243 | 5.206096  | 3.811571  |
| C | -3.208672 | 2.710831  | -1.978504 |
| H | -3.340938 | 1.658009  | -1.655497 |
| C | -4.600007 | 3.333274  | -2.130477 |
| H | -5.194094 | 2.772351  | -2.881475 |
| H | -4.523859 | 4.393029  | -2.455553 |
| H | -5.144001 | 3.293832  | -1.164319 |
| C | -2.492216 | 2.651186  | -3.337679 |
| H | -2.979901 | 1.901394  | -3.993608 |
| H | -1.432250 | 2.359122  | -3.204021 |
| H | -2.528612 | 3.628907  | -3.861853 |
| N | 1.982265  | -1.657155 | 2.000405  |
| N | 2.193684  | -2.303218 | -0.848770 |
| C | 2.200239  | -2.974240 | 2.102703  |
| C | 2.167603  | -3.849495 | 0.997148  |
| H | 2.202945  | -4.908428 | 1.244356  |
| C | 2.190407  | -3.556130 | -0.377798 |
| C | 2.149237  | -0.798085 | 3.116605  |
| C | 3.394705  | -0.144036 | 3.314134  |
| C | 3.576833  | 0.634879  | 4.471648  |



|   |           |           |           |
|---|-----------|-----------|-----------|
| H | 4.525998  | 1.109401  | 4.678855  |
| C | 2.540280  | 0.813128  | 5.381911  |
| H | 2.693784  | 1.427952  | 6.259466  |
| C | 1.311189  | 0.195571  | 5.176824  |
| H | 0.528803  | 0.351438  | 5.907830  |
| C | 1.094385  | -0.625964 | 4.056291  |
| C | 4.553053  | -0.334652 | 2.336485  |
| H | 4.169045  | -0.717486 | 1.366076  |
| C | 5.278585  | 0.982396  | 2.019416  |
| H | 4.546034  | 1.782840  | 1.798434  |
| H | 5.934745  | 0.848841  | 1.132820  |
| H | 5.916398  | 1.311136  | 2.866503  |
| C | 5.545083  | -1.369453 | 2.875592  |
| H | 5.035889  | -2.340883 | 3.037896  |
| H | 5.983969  | -1.031018 | 3.838637  |
| H | 6.365110  | -1.529988 | 2.143190  |
| C | -0.245278 | -1.341098 | 3.905315  |
| H | -0.231815 | -1.988770 | 3.010576  |
| C | -1.391145 | -0.349042 | 3.693483  |
| H | -1.236801 | 0.186756  | 2.737173  |
| H | -1.452231 | 0.384145  | 4.524760  |
| H | -2.362289 | -0.884165 | 3.629290  |
| C | -0.535432 | -2.252096 | 5.106224  |
| H | -1.437145 | -2.868311 | 4.905473  |
| H | -0.718189 | -1.658829 | 6.026728  |
| H | 0.316672  | -2.938511 | 5.288114  |
| C | 2.464100  | -2.020860 | -2.210555 |
| C | 1.388854  | -1.718480 | -3.085974 |
| C | 1.666739  | -1.435127 | -4.434568 |
| H | 0.866176  | -1.224294 | -5.131173 |
| C | 2.975724  | -1.425973 | -4.905316 |
| H | 3.171949  | -1.200421 | -5.945643 |
| C | 4.032199  | -1.725983 | -4.050872 |
| H | 5.035292  | -1.730938 | -4.456317 |
| C | 3.801942  | -2.035552 | -2.697736 |
| C | -0.059624 | -1.761370 | -2.609141 |
| H | -0.097793 | -1.837633 | -1.504458 |
| C | -0.820497 | -0.482161 | -2.971515 |
| H | -0.203091 | 0.404146  | -2.735257 |
| H | -1.756118 | -0.421220 | -2.376439 |
| H | -1.083166 | -0.453701 | -4.050026 |
| C | -0.780263 | -2.993084 | -3.165470 |
| H | -0.270368 | -3.919180 | -2.826905 |
| H | -0.798097 | -2.976854 | -4.275987 |
| H | -1.826036 | -3.019219 | -2.795426 |
| C | 4.985328  | -2.418962 | -1.808884 |
| H | 4.648548  | -2.619462 | -0.771665 |
| C | 6.017534  | -1.289127 | -1.706256 |
| H | 5.551583  | -0.385293 | -1.274372 |
| H | 6.446967  | -1.036119 | -2.697969 |
| H | 6.846738  | -1.592310 | -1.031763 |

|   |           |           |           |
|---|-----------|-----------|-----------|
| C | 5.653112  | -3.704752 | -2.314859 |
| H | 4.900431  | -4.510226 | -2.437012 |
| H | 6.415032  | -4.050611 | -1.584062 |
| H | 6.153532  | -3.538539 | -3.292298 |
| N | -0.429421 | 0.444122  | 0.183707  |
| N | 0.219111  | 1.422948  | -0.298094 |
| N | 1.478551  | 1.137899  | -0.574721 |
| C | 2.276722  | 2.234737  | -1.132371 |
| C | 1.651814  | 2.789172  | -2.432385 |
| H | 0.639607  | 3.200711  | -2.229384 |
| H | 1.537688  | 1.975228  | -3.181575 |
| C | 3.665285  | 1.675111  | -1.458489 |
| H | 3.577347  | 0.843871  | -2.192102 |
| H | 4.121947  | 1.258385  | -0.538998 |
| C | 2.420014  | 3.385978  | -0.113894 |
| H | 2.846574  | 3.009845  | 0.839091  |
| H | 1.423219  | 3.807085  | 0.128104  |
| C | 2.544833  | 3.905880  | -3.018533 |
| H | 2.084632  | 4.299081  | -3.950970 |
| C | 4.574495  | 2.779971  | -2.038211 |
| H | 5.577344  | 2.356119  | -2.263085 |
| C | 3.318099  | 4.501117  | -0.691521 |
| H | 3.415145  | 5.322604  | 0.051115  |
| C | 2.681374  | 5.048504  | -1.988072 |
| H | 3.311336  | 5.864257  | -2.405877 |
| H | 1.681472  | 5.482051  | -1.767290 |
| C | 3.942113  | 3.329881  | -3.334694 |
| H | 4.591325  | 4.121237  | -3.769665 |
| H | 3.856570  | 2.517524  | -4.089904 |
| C | 4.713794  | 3.921512  | -1.007979 |
| H | 5.186664  | 3.538084  | -0.077274 |
| H | 5.374755  | 4.719739  | -1.411510 |
| C | -4.850932 | 3.222416  | 1.778767  |
| H | -5.855945 | 3.314219  | 1.314697  |
| H | -4.966957 | 3.254299  | 2.882636  |
| H | -4.271890 | 4.112715  | 1.467821  |
| C | -6.028539 | -1.477622 | 1.498352  |
| H | -6.027613 | -1.623642 | 2.599254  |
| H | -7.007846 | -1.048353 | 1.200231  |
| H | -5.939056 | -2.476585 | 1.029017  |
| C | 2.489824  | -3.660337 | 3.431017  |
| H | 1.662918  | -4.361128 | 3.672629  |
| H | 3.433428  | -4.241091 | 3.353768  |
| H | 2.608855  | -2.962688 | 4.282006  |
| C | 2.200870  | -4.771501 | -1.291545 |
| H | 3.091899  | -5.396745 | -1.073164 |
| H | 1.288350  | -5.377589 | -1.107739 |
| H | 2.216034  | -4.516021 | -2.369217 |

**L<sup>Me</sup>Fe(μ-N<sub>2</sub>)(μ-N<sub>3</sub>Ad)FeL<sup>Me</sup>** (septet, C<sub>66</sub>H<sub>95</sub>Fe<sub>2</sub>N<sub>9</sub>)

|   |           |          |           |
|---|-----------|----------|-----------|
| H | -0.072611 | 0.117882 | -6.829888 |
|---|-----------|----------|-----------|

|   |           |           |           |
|---|-----------|-----------|-----------|
| C | -0.116784 | 0.044512  | -5.745480 |
| C | -0.090034 | -1.271136 | -5.228262 |
| C | -0.331850 | 1.256718  | -5.068275 |
| N | -0.411522 | 1.342157  | -3.735449 |
| N | 0.002636  | -1.535050 | -3.924944 |
| N | -1.068548 | 0.019717  | -0.910289 |
| N | -0.726383 | 0.177946  | 0.180338  |
| C | -0.232704 | 0.073611  | 4.861925  |
| N | -0.502011 | -1.339146 | 2.908077  |
| N | -0.094022 | 1.734183  | 3.084802  |
| C | -0.327957 | 1.401284  | 4.354661  |
| C | -0.399919 | -1.175745 | 4.236332  |
| H | -0.191297 | 0.022961  | 5.949163  |
| C | -1.185115 | -2.469611 | 2.365224  |
| C | -2.502337 | -4.824276 | 1.543838  |
| C | -0.450470 | -3.541612 | 1.786330  |
| C | -2.601955 | -2.578380 | 2.474482  |
| C | -3.233963 | -3.770380 | 2.071681  |
| C | -1.128211 | -4.711411 | 1.393916  |
| H | -4.306336 | -3.886131 | 2.155293  |
| H | -0.590782 | -5.552480 | 0.976674  |
| H | -3.006424 | -5.731448 | 1.236177  |
| C | -0.313353 | 3.065744  | 2.610362  |
| C | -0.851986 | 5.699712  | 1.835556  |
| C | 0.664837  | 4.096927  | 2.779861  |
| C | -1.573491 | 3.424032  | 2.056411  |
| C | -1.793591 | 4.764303  | 1.677206  |
| C | 0.336630  | 5.408103  | 2.374133  |
| H | -2.747616 | 5.071047  | 1.269979  |
| H | 1.044128  | 6.216223  | 2.503167  |
| H | -1.063935 | 6.719921  | 1.539523  |
| C | 0.044349  | -2.860499 | -3.422919 |
| C | 0.059038  | -5.544139 | -2.600115 |
| C | 1.251515  | -3.610942 | -3.474935 |
| C | -1.136907 | -3.447393 | -2.900518 |
| C | -1.112280 | -4.799085 | -2.512147 |
| C | 1.232342  | -4.956107 | -3.062999 |
| H | -2.004812 | -5.285247 | -2.141464 |
| H | 2.130987  | -5.557662 | -3.096800 |
| H | 0.061827  | -6.581484 | -2.291146 |
| C | -1.061909 | 2.430764  | -3.098898 |
| C | -2.314193 | 4.677524  | -1.972101 |
| C | -0.292042 | 3.396421  | -2.403759 |
| C | -2.477441 | 2.559473  | -3.159764 |
| C | -3.079765 | 3.705291  | -2.607984 |
| C | -0.937387 | 4.520055  | -1.855801 |
| H | -4.152759 | 3.838867  | -2.645954 |
| H | -0.373876 | 5.283091  | -1.335160 |
| H | -2.795109 | 5.546850  | -1.542445 |
| C | -0.443618 | -2.362904 | 5.187452  |
| H | 0.508451  | -2.414544 | 5.757203  |

|   |           |           |           |
|---|-----------|-----------|-----------|
| H | -0.570760 | -3.333430 | 4.669060  |
| H | -1.282063 | -2.243227 | 5.904705  |
| C | -0.790257 | 2.408038  | 5.400357  |
| H | -0.063158 | 2.440250  | 6.238659  |
| H | -1.772191 | 2.088008  | 5.809030  |
| H | -0.921710 | 3.435819  | 5.011109  |
| C | -0.226610 | -2.364651 | -6.277021 |
| H | 0.623420  | -2.306551 | -6.988969 |
| H | -1.172569 | -2.219178 | -6.840705 |
| H | -0.252358 | -3.388480 | -5.855963 |
| C | -0.444082 | 2.486318  | -5.954429 |
| H | 0.484974  | 2.596843  | -6.552861 |
| H | -0.579450 | 3.425162  | -5.381085 |
| H | -1.302357 | 2.373108  | -6.648799 |
| C | 1.055383  | -3.478900 | 1.614063  |
| H | 1.414303  | -2.473403 | 1.880718  |
| C | 1.757107  | -4.476450 | 2.544471  |
| H | 2.859108  | -4.394269 | 2.440083  |
| H | 1.461506  | -5.520540 | 2.308613  |
| H | 1.496139  | -4.258958 | 3.601423  |
| C | 1.457343  | -3.710397 | 0.152762  |
| H | 2.545843  | -3.555216 | 0.020223  |
| H | 0.918521  | -2.997938 | -0.507350 |
| H | 1.231822  | -4.747793 | -0.164222 |
| C | 2.027880  | 3.861279  | 3.422067  |
| H | 2.190520  | 2.776386  | 3.555552  |
| C | 2.111453  | 4.513393  | 4.809115  |
| H | 3.090626  | 4.279399  | 5.279354  |
| H | 1.318520  | 4.133684  | 5.476262  |
| H | 2.007733  | 5.617214  | 4.738912  |
| C | 3.173053  | 4.403979  | 2.546806  |
| H | 4.147468  | 4.016726  | 2.912473  |
| H | 3.222315  | 5.512623  | 2.577019  |
| H | 3.044415  | 4.099029  | 1.491577  |
| C | -2.724410 | 2.434850  | 1.957833  |
| H | -2.363637 | 1.411797  | 2.175229  |
| C | -3.804601 | 2.776260  | 2.992346  |
| H | -3.374894 | 2.753984  | 4.014767  |
| H | -4.630905 | 2.039394  | 2.952140  |
| H | -4.230197 | 3.785344  | 2.807012  |
| C | -3.321264 | 2.397417  | 0.544965  |
| H | -2.518500 | 2.230460  | -0.200112 |
| H | -3.850884 | 3.340274  | 0.298209  |
| H | -4.057473 | 1.574124  | 0.459321  |
| C | 1.215838  | 3.249092  | -2.252546 |
| H | 1.563337  | 2.295017  | -2.700395 |
| C | -3.360708 | 1.468719  | -3.759671 |
| H | -2.744692 | 0.633308  | -4.148299 |
| C | 1.616357  | 3.205509  | -0.773889 |
| H | 2.694543  | 2.954783  | -0.682148 |
| H | 1.031520  | 2.428448  | -0.238140 |

|    |           |           |           |
|----|-----------|-----------|-----------|
| H  | 1.435555  | 4.184656  | -0.283848 |
| C  | 1.955036  | 4.371273  | -2.990107 |
| H  | 3.051850  | 4.202732  | -2.936634 |
| H  | 1.728905  | 5.363058  | -2.544487 |
| H  | 1.657302  | 4.381534  | -4.060507 |
| C  | -4.180905 | 1.999525  | -4.941975 |
| H  | -3.514433 | 2.479659  | -5.687546 |
| H  | -4.935206 | 2.742736  | -4.608128 |
| H  | -4.712245 | 1.161063  | -5.440916 |
| C  | -4.277126 | 0.854953  | -2.693723 |
| H  | -3.670007 | 0.463710  | -1.851438 |
| H  | -4.850982 | 0.007945  | -3.126378 |
| H  | -4.996553 | 1.603034  | -2.299104 |
| C  | -3.466942 | -1.427094 | 2.966219  |
| H  | -2.839872 | -0.551294 | 3.219146  |
| C  | -4.230875 | -1.802101 | 4.241900  |
| H  | -3.525746 | -2.158643 | 5.020382  |
| H  | -4.978734 | -2.599011 | 4.045926  |
| H  | -4.763092 | -0.911352 | 4.639009  |
| C  | -4.434796 | -0.978835 | 1.863212  |
| H  | -3.863935 | -0.713530 | 0.948929  |
| H  | -5.012873 | -0.093566 | 2.193689  |
| H  | -5.160378 | -1.778692 | 1.606978  |
| C  | 2.560143  | -2.998252 | -3.967285 |
| H  | 2.406207  | -1.942507 | -4.272053 |
| C  | 3.614719  | -2.973245 | -2.853972 |
| H  | 4.538631  | -2.473010 | -3.214976 |
| H  | 3.876875  | -3.999586 | -2.521044 |
| H  | 3.235325  | -2.400708 | -1.984661 |
| C  | 3.095635  | -3.740653 | -5.199224 |
| H  | 3.968322  | -3.196771 | -5.619708 |
| H  | 2.315140  | -3.800770 | -5.984930 |
| H  | 3.418031  | -4.771123 | -4.940158 |
| C  | -2.436641 | -2.657372 | -2.795264 |
| H  | -2.255679 | -1.585160 | -3.016488 |
| C  | -3.019212 | -2.709922 | -1.375730 |
| H  | -2.244927 | -2.428314 | -0.631981 |
| H  | -3.398074 | -3.723541 | -1.129765 |
| H  | -3.866072 | -1.997557 | -1.286473 |
| C  | -3.456860 | -3.155131 | -3.823709 |
| H  | -3.031531 | -3.077822 | -4.847197 |
| H  | -4.375329 | -2.531640 | -3.782291 |
| H  | -3.735568 | -4.212676 | -3.629269 |
| Fe | 0.189520  | -0.119232 | -2.496528 |
| Fe | 0.233639  | 0.154631  | 1.743769  |
| N  | 1.738535  | -0.187455 | -1.358835 |
| N  | 2.171924  | -0.175016 | 0.922877  |
| N  | 2.400524  | -0.230891 | -0.365382 |
| C  | 3.428446  | -0.222675 | 1.736297  |
| C  | 4.246466  | 1.059702  | 1.509729  |
| H  | 3.613121  | 1.930348  | 1.739338  |

|   |          |           |          |
|---|----------|-----------|----------|
| H | 4.547471 | 1.148161  | 0.442383 |
| C | 3.034976 | -0.314121 | 3.221501 |
| H | 2.454745 | -1.237933 | 3.420509 |
| H | 2.382881 | 0.535276  | 3.500196 |
| C | 4.318232 | -1.438279 | 1.387492 |
| H | 4.619368 | -1.413603 | 0.317030 |
| H | 3.763885 | -2.379615 | 1.552763 |
| C | 4.292174 | -0.317464 | 4.117777 |
| H | 3.987683 | -0.380030 | 5.185211 |
| C | 5.585177 | -1.448039 | 2.273858 |
| H | 6.215353 | -2.325773 | 2.012372 |
| C | 5.507653 | 1.067453  | 2.400511 |
| H | 6.079251 | 2.005223  | 2.228411 |
| C | 5.091931 | 0.981014  | 3.884646 |
| H | 5.994759 | 0.993704  | 4.533925 |
| H | 4.473897 | 1.861883  | 4.161949 |
| C | 5.170149 | -1.535480 | 3.758548 |
| H | 6.073902 | -1.558054 | 4.406351 |
| H | 4.606888 | -2.477302 | 3.941129 |
| C | 6.387059 | -0.149222 | 2.040862 |
| H | 7.307316 | -0.152139 | 2.665453 |
| H | 6.707547 | -0.086187 | 0.977642 |

**L<sup>Me</sup>Fe(μ-AdNNNNNNAd)FeL<sup>Me</sup> (1)** (septet, C<sub>78</sub>H<sub>112</sub>Fe<sub>2</sub>N<sub>10</sub>)

|    |           |           |           |
|----|-----------|-----------|-----------|
| Fe | 2.338943  | 0.041510  | 0.285559  |
| N  | 1.075071  | 1.781812  | 0.383559  |
| N  | -0.540192 | 0.350681  | -0.129919 |
| N  | -0.164089 | 1.567487  | 0.109547  |
| N  | 3.394154  | -0.459456 | 1.939254  |
| N  | 3.973180  | 0.143594  | -1.000762 |
| C  | 4.596561  | 0.130847  | 2.052419  |
| C  | 5.357070  | 0.558791  | 0.948739  |
| H  | 6.328293  | 0.978686  | 1.205083  |
| C  | 5.168153  | 0.337569  | -0.444736 |
| C  | 2.860159  | -1.267513 | 2.989280  |
| C  | 1.854708  | -0.755979 | 3.858980  |
| C  | 1.415914  | -1.539728 | 4.943943  |
| H  | 0.662363  | -1.172402 | 5.627751  |
| C  | 1.948306  | -2.797518 | 5.179541  |
| H  | 1.600607  | -3.382219 | 6.021595  |
| C  | 2.927813  | -3.305989 | 4.341068  |
| H  | 3.322847  | -4.289391 | 4.558457  |
| C  | 3.392531  | -2.568030 | 3.235885  |
| C  | 1.278462  | 0.638635  | 3.697949  |
| H  | 1.705110  | 1.116990  | 2.799792  |
| C  | 1.653109  | 1.522908  | 4.896966  |
| H  | 2.757292  | 1.570359  | 5.004047  |
| H  | 1.217852  | 1.130408  | 5.839773  |
| H  | 1.279220  | 2.557123  | 4.754192  |
| C  | -0.244537 | 0.588457  | 3.505085  |

|   |           |           |           |
|---|-----------|-----------|-----------|
| H | -0.496422 | -0.010482 | 2.607005  |
| H | -0.647503 | 1.607238  | 3.359686  |
| H | -0.756992 | 0.149551  | 4.385524  |
| C | 4.434206  | -3.206770 | 2.328133  |
| H | 4.664442  | -2.541978 | 1.474616  |
| C | 5.755211  | -3.440082 | 3.071545  |
| H | 6.119259  | -2.491311 | 3.515214  |
| H | 6.527308  | -3.810278 | 2.363616  |
| H | 5.634957  | -4.187965 | 3.883533  |
| C | 3.903927  | -4.522900 | 1.743303  |
| H | 2.906057  | -4.357603 | 1.285537  |
| H | 3.804679  | -5.305131 | 2.524568  |
| H | 4.598986  | -4.906986 | 0.970063  |
| C | 3.838376  | -0.244326 | -2.370075 |
| C | 3.816452  | 0.734605  | -3.414233 |
| C | 3.779702  | 0.304706  | -4.754811 |
| H | 3.792666  | 1.015716  | -5.569309 |
| C | 3.745635  | -1.042795 | -5.075647 |
| H | 3.721160  | -1.350083 | -6.113404 |
| C | 3.780590  | -1.998243 | -4.073022 |
| H | 3.806663  | -3.038154 | -4.368521 |
| C | 3.832797  | -1.626956 | -2.716045 |
| C | 3.877336  | 2.234038  | -3.143549 |
| H | 3.786903  | 2.422928  | -2.056996 |
| C | 5.216445  | 2.828388  | -3.600695 |
| H | 6.064552  | 2.311406  | -3.115248 |
| H | 5.268799  | 3.902768  | -3.322234 |
| H | 5.337359  | 2.742945  | -4.701563 |
| C | 2.725779  | 2.979970  | -3.839457 |
| H | 1.753886  | 2.529727  | -3.560020 |
| H | 2.820387  | 2.952949  | -4.944346 |
| H | 2.725700  | 4.048824  | -3.536430 |
| C | 4.001105  | -2.720739 | -1.670807 |
| H | 3.953863  | -2.286260 | -0.654636 |
| C | 5.374116  | -3.389739 | -1.819181 |
| H | 6.178722  | -2.626841 | -1.770056 |
| H | 5.453235  | -3.930361 | -2.786084 |
| H | 5.542973  | -4.115909 | -0.999168 |
| C | 2.876440  | -3.762147 | -1.748862 |
| H | 1.912656  | -3.276712 | -1.515638 |
| H | 3.043007  | -4.572396 | -1.012642 |
| H | 2.809767  | -4.237190 | -2.748226 |
| C | 1.388473  | 3.221968  | 0.589268  |
| C | 2.875735  | 3.338714  | 0.962619  |
| H | 3.509619  | 2.883371  | 0.174589  |
| H | 3.084707  | 2.783496  | 1.902267  |
| C | 0.541593  | 3.849876  | 1.718071  |
| H | 0.711714  | 3.312217  | 2.666632  |
| H | -0.541523 | 3.777138  | 1.480849  |
| C | 1.123530  | 4.013011  | -0.704532 |
| H | 0.051909  | 3.945738  | -0.995284 |

|    |           |           |           |
|----|-----------|-----------|-----------|
| H  | 1.710695  | 3.569071  | -1.519064 |
| C  | 3.269391  | 4.820262  | 1.149859  |
| H  | 4.346951  | 4.887833  | 1.414761  |
| C  | 0.922757  | 5.334969  | 1.914177  |
| H  | 0.308357  | 5.771853  | 2.731228  |
| C  | 1.513914  | 5.494812  | -0.528519 |
| H  | 1.325613  | 6.044207  | -1.476510 |
| C  | 2.419036  | 5.434551  | 2.283023  |
| H  | 2.703198  | 6.498500  | 2.438468  |
| H  | 2.611714  | 4.896228  | 3.237300  |
| C  | 0.664248  | 6.109063  | 0.603887  |
| H  | -0.415378 | 6.058847  | 0.339416  |
| H  | 0.924792  | 7.182043  | 0.736768  |
| C  | 3.011122  | 5.589252  | -0.163863 |
| H  | 3.307542  | 6.654623  | -0.046031 |
| H  | 3.629442  | 5.160157  | -0.983336 |
| N  | -1.242153 | -1.959705 | -0.613512 |
| C  | -1.648499 | -3.259494 | -1.245510 |
| C  | -3.186467 | -3.325372 | -1.277827 |
| H  | -3.613063 | -3.268909 | -0.257268 |
| H  | -3.590231 | -2.458324 | -1.845826 |
| C  | -1.137467 | -3.341436 | -2.702540 |
| H  | -1.536107 | -2.499886 | -3.290972 |
| H  | -0.031095 | -3.279402 | -2.740162 |
| C  | -1.097320 | -4.482031 | -0.476861 |
| H  | 0.013574  | -4.460232 | -0.445916 |
| H  | -1.449126 | -4.476712 | 0.563962  |
| C  | -3.660675 | -4.639914 | -1.939048 |
| H  | -4.771921 | -4.673174 | -1.943927 |
| C  | -1.595263 | -4.652797 | -3.376258 |
| H  | -1.214214 | -4.688027 | -4.420138 |
| C  | -1.567591 | -5.796288 | -1.136771 |
| H  | -1.172032 | -6.662674 | -0.563227 |
| C  | -3.137372 | -4.704546 | -3.388799 |
| H  | -3.483818 | -5.641072 | -3.878576 |
| H  | -3.542438 | -3.852068 | -3.977645 |
| C  | -1.042634 | -5.855534 | -2.585366 |
| H  | 0.069691  | -5.834004 | -2.588536 |
| H  | -1.359031 | -6.806714 | -3.067099 |
| C  | -3.111611 | -5.843594 | -1.143212 |
| H  | -3.460623 | -6.794419 | -1.602612 |
| H  | -3.498957 | -5.818274 | -0.101538 |
| N  | 0.468214  | -0.625787 | -0.176022 |
| N  | 0.040895  | -1.806839 | -0.493181 |
| Fe | -2.320232 | -0.307160 | -0.188584 |
| N  | -3.386179 | 0.967917  | -1.292095 |
| N  | -3.796489 | -0.661796 | 1.118081  |
| C  | -4.612987 | 0.511238  | -1.565944 |
| C  | -5.314898 | -0.395426 | -0.731534 |
| H  | -6.287866 | -0.710506 | -1.102377 |
| C  | -5.016051 | -0.790625 | 0.591681  |



|   |           |           |           |
|---|-----------|-----------|-----------|
| C | -2.775177 | 2.026344  | -2.041318 |
| C | -1.789106 | 1.731706  | -3.029934 |
| C | -1.221368 | 2.780371  | -3.777976 |
| H | -0.498929 | 2.580607  | -4.557320 |
| C | -1.597355 | 4.095771  | -3.566449 |
| H | -1.146629 | 4.887407  | -4.151300 |
| C | -2.579239 | 4.395324  | -2.636981 |
| H | -2.873191 | 5.430735  | -2.529528 |
| C | -3.194191 | 3.383722  | -1.873447 |
| C | -1.419683 | 0.306672  | -3.401232 |
| H | -1.818402 | -0.381672 | -2.634709 |
| C | -2.064146 | -0.068989 | -4.744034 |
| H | -3.170222 | -0.047100 | -4.654086 |
| H | -1.757668 | 0.637133  | -5.544848 |
| H | -1.762005 | -1.089126 | -5.057873 |
| C | 0.106104  | 0.101027  | -3.458817 |
| H | 0.601133  | 0.572557  | -2.586067 |
| H | 0.353359  | -0.978994 | -3.454058 |
| H | 0.538594  | 0.534124  | -4.384796 |
| C | -4.304505 | 3.792609  | -0.916421 |
| H | -4.688207 | 2.912707  | -0.369733 |
| C | -5.498499 | 4.394221  | -1.672160 |
| H | -5.831115 | 3.715298  | -2.482426 |
| H | -6.349976 | 4.545303  | -0.974637 |
| H | -5.238098 | 5.374842  | -2.123689 |
| C | -3.785106 | 4.789699  | 0.126048  |
| H | -2.896195 | 4.370578  | 0.641294  |
| H | -3.494398 | 5.755138  | -0.337606 |
| H | -4.581637 | 5.003412  | 0.868619  |
| C | -3.607594 | -0.584393 | 2.538051  |
| C | -3.134029 | -1.708657 | 3.276273  |
| C | -3.244244 | -1.712645 | 4.680326  |
| H | -2.936202 | -2.571347 | 5.261652  |
| C | -3.772431 | -0.626760 | 5.358552  |
| H | -3.862430 | -0.653907 | 6.436991  |
| C | -4.162502 | 0.503379  | 4.659413  |
| H | -4.552078 | 1.339786  | 5.224465  |
| C | -4.046529 | 0.566221  | 3.257186  |
| C | -2.535840 | -2.923409 | 2.600956  |
| H | -2.447362 | -2.715851 | 1.526612  |
| C | -3.445267 | -4.147257 | 2.772944  |
| H | -4.450086 | -3.935985 | 2.349405  |
| H | -3.023764 | -5.023200 | 2.238474  |
| H | -3.555159 | -4.417695 | 3.844092  |
| C | -1.110901 | -3.210590 | 3.108931  |
| H | -0.439522 | -2.370857 | 2.840415  |
| H | -1.082762 | -3.358785 | 4.207357  |
| H | -0.699204 | -4.130034 | 2.646578  |
| C | -4.367511 | 1.878959  | 2.563141  |
| H | -4.145484 | 1.790904  | 1.482971  |
| C | -5.853556 | 2.231184  | 2.700076  |

|   |           |           |           |
|---|-----------|-----------|-----------|
| H | -6.482551 | 1.394278  | 2.336035  |
| H | -6.118646 | 2.446332  | 3.756705  |
| H | -6.089020 | 3.127314  | 2.087157  |
| C | -3.483140 | 3.016843  | 3.105954  |
| H | -2.449836 | 2.901282  | 2.724846  |
| H | -3.864299 | 4.004058  | 2.785729  |
| H | -3.450909 | 3.041211  | 4.213446  |
| C | 6.464821  | 0.307322  | -1.240760 |
| H | 6.973643  | 1.291164  | -1.164046 |
| H | 7.138264  | -0.468318 | -0.818295 |

**L<sup>Me</sup>Fe(N<sub>3</sub>Ad-κN<sup>1</sup>N<sup>3</sup>)** triazametallocyclobutene core (quartet, C<sub>39</sub>H<sub>56</sub>FeN<sub>5</sub>)

|    |           |           |           |
|----|-----------|-----------|-----------|
| N  | -2.061024 | -1.265871 | -0.369404 |
| N  | -1.796639 | 1.629722  | -0.322639 |
| C  | -3.316450 | -0.960251 | -0.714793 |
| C  | -3.097513 | 1.571018  | -0.612952 |
| C  | -3.776114 | 0.361049  | -0.858013 |
| H  | -4.820430 | 0.463272  | -1.143376 |
| N  | 0.831263  | -1.194541 | 0.141743  |
| N  | 1.639069  | -0.186872 | 0.084019  |
| N  | 1.047053  | 0.968103  | -0.089432 |
| Fe | -0.614105 | 0.058201  | -0.101991 |
| C  | -3.972634 | 2.814037  | -0.689739 |
| H  | -4.397892 | 2.906096  | -1.711568 |
| H  | -4.806507 | 2.725595  | 0.038707  |
| H  | -3.438426 | 3.756660  | -0.462040 |
| C  | -4.372947 | -2.027351 | -0.965697 |
| H  | -5.213898 | -1.891536 | -0.252900 |
| H  | -4.761351 | -1.928677 | -2.001577 |
| H  | -4.003974 | -3.064621 | -0.848012 |
| C  | -1.672156 | -2.602863 | -0.108571 |
| C  | -1.737573 | -3.106577 | 1.215254  |
| C  | -1.162065 | -3.411544 | -1.157983 |
| C  | -1.335977 | -4.432353 | 1.459177  |
| C  | -0.773871 | -4.732529 | -0.869978 |
| C  | -0.864821 | -5.235643 | 0.424665  |
| H  | -1.382255 | -4.849237 | 2.456645  |
| H  | -0.392432 | -5.378967 | -1.649378 |
| H  | -0.559199 | -6.253627 | 0.629617  |
| C  | -1.164251 | 2.852105  | 0.014167  |
| C  | -0.651937 | 3.696610  | -1.006191 |
| C  | -0.976918 | 3.186686  | 1.379171  |
| C  | -0.012678 | 4.894611  | -0.638525 |
| C  | -0.335828 | 4.396324  | 1.701741  |
| C  | 0.135069  | 5.241525  | 0.701278  |
| H  | 0.383350  | 5.563475  | -1.391266 |
| H  | -0.191016 | 4.687091  | 2.733897  |
| H  | 0.630405  | 6.166676  | 0.966696  |
| C  | -1.450139 | 2.261546  | 2.496312  |

|   |           |           |           |
|---|-----------|-----------|-----------|
| C | -2.525898 | 2.938637  | 3.352977  |
| C | -0.273745 | 1.786723  | 3.358923  |
| H | -1.915673 | 1.344897  | 2.077922  |
| H | -3.366658 | 3.274909  | 2.708869  |
| H | -2.926855 | 2.218663  | 4.098151  |
| H | -2.115126 | 3.815607  | 3.896323  |
| H | 0.485846  | 1.283308  | 2.723597  |
| H | 0.206501  | 2.635109  | 3.890057  |
| H | -0.628431 | 1.056771  | 4.116855  |
| C | -0.756538 | 3.322262  | -2.481337 |
| C | 0.633434  | 3.131488  | -3.101957 |
| C | -1.566747 | 4.363800  | -3.263611 |
| H | -1.286243 | 2.354728  | -2.602862 |
| H | 1.206124  | 2.371434  | -2.529700 |
| H | 0.536240  | 2.773193  | -4.149065 |
| H | 1.206462  | 4.082612  | -3.107998 |
| H | -2.563229 | 4.505023  | -2.794947 |
| H | -1.043415 | 5.342604  | -3.293612 |
| H | -1.722054 | 4.017383  | -4.307687 |
| C | -2.225165 | -2.240193 | 2.372258  |
| C | -1.122748 | -2.044680 | 3.420085  |
| C | -3.492194 | -2.827141 | 3.005132  |
| H | -2.495982 | -1.224375 | 2.016769  |
| H | -0.221529 | -1.601207 | 2.944742  |
| H | -1.472666 | -1.350943 | 4.213872  |
| H | -0.842333 | -3.007791 | 3.895962  |
| H | -4.274917 | -2.964870 | 2.228610  |
| H | -3.286009 | -3.806387 | 3.486288  |
| H | -3.888166 | -2.132634 | 3.776617  |
| C | -1.023265 | -2.878696 | -2.580773 |
| C | -1.918254 | -3.659215 | -3.551110 |
| C | 0.439334  | -2.902977 | -3.045394 |
| H | -1.348585 | -1.818760 | -2.634581 |
| H | -2.972370 | -3.633643 | -3.202712 |
| H | -1.876909 | -3.197847 | -4.560892 |
| H | -1.593907 | -4.717937 | -3.634781 |
| H | 1.078124  | -2.338723 | -2.334145 |
| H | 0.821533  | -3.942523 | -3.122765 |
| H | 0.528519  | -2.422048 | -4.042880 |
| C | 3.130214  | -0.297076 | 0.137687  |
| C | 3.553192  | -1.733606 | 0.503596  |
| C | 3.711312  | 0.067575  | -1.238817 |
| C | 3.676946  | 0.678604  | 1.195580  |
| H | 3.161919  | -2.456299 | -0.247087 |
| H | 3.130098  | -2.019314 | 1.492475  |
| C | 5.094159  | -1.832657 | 0.551863  |
| H | 3.409197  | 1.099046  | -1.526608 |
| H | 3.312498  | -0.620911 | -2.016753 |
| C | 5.253938  | -0.024636 | -1.200114 |
| H | 3.251587  | 0.436200  | 2.194822  |
| H | 3.378667  | 1.723453  | 0.955920  |

|   |          |           |           |
|---|----------|-----------|-----------|
| C | 5.218960 | 0.588702  | 1.247263  |
| H | 5.392614 | -2.870345 | 0.816329  |
| C | 5.673212 | -1.465081 | -0.832274 |
| C | 5.637359 | -0.851998 | 1.614266  |
| H | 5.667899 | 0.240122  | -2.197258 |
| C | 5.798922 | 0.955187  | -0.137120 |
| H | 5.607746 | 1.295195  | 2.012445  |
| H | 5.300905 | -2.177127 | -1.601374 |
| H | 6.782333 | -1.545910 | -0.814427 |
| H | 5.238697 | -1.119484 | 2.617558  |
| H | 6.745927 | -0.924465 | 1.667446  |
| H | 6.909752 | 0.907337  | -0.109228 |
| H | 5.518411 | 1.998228  | -0.402631 |

**L<sup>Me</sup>Fe(N<sub>3</sub>Ad-κN<sup>1</sup>N<sup>3</sup>)** triazametallocyclobutene core (sextet, C<sub>39</sub>H<sub>56</sub>FeN<sub>5</sub>)

|    |           |           |           |
|----|-----------|-----------|-----------|
| N  | -1.875297 | -1.421807 | -0.613682 |
| N  | -1.781119 | 1.522028  | -0.614846 |
| C  | -3.035679 | -1.191869 | -1.235103 |
| C  | -2.956050 | 1.366449  | -1.231442 |
| C  | -3.482037 | 0.102824  | -1.579345 |
| H  | -4.422109 | 0.132900  | -2.125161 |
| N  | 0.904443  | -0.028147 | 0.964151  |
| N  | 1.768662  | -0.051494 | -0.032850 |
| N  | 1.317954  | -0.043010 | -1.246559 |
| Fe | -0.512876 | 0.008184  | -0.387177 |
| C  | -3.836245 | 2.549286  | -1.604265 |
| H  | -4.004433 | 2.555632  | -2.702080 |
| H  | -4.817284 | 2.458379  | -1.091774 |
| H  | -3.403271 | 3.531152  | -1.330133 |
| C  | -3.984420 | -2.317176 | -1.617776 |
| H  | -4.960358 | -2.169619 | -1.108757 |
| H  | -4.147964 | -2.307597 | -2.716274 |
| H  | -3.612766 | -3.324935 | -1.347601 |
| C  | -1.522084 | -2.700373 | -0.117733 |
| C  | -1.961034 | -3.106259 | 1.169130  |
| C  | -0.720782 | -3.567753 | -0.904756 |
| C  | -1.636126 | -4.397838 | 1.622729  |
| C  | -0.427632 | -4.853854 | -0.416082 |
| C  | -0.883807 | -5.262210 | 0.833374  |
| H  | -1.965983 | -4.742287 | 2.594004  |
| H  | 0.159428  | -5.547880 | -1.003006 |
| H  | -0.646299 | -6.254107 | 1.195960  |
| C  | -1.347395 | 2.774364  | -0.115955 |
| C  | -0.504364 | 3.597549  | -0.906800 |
| C  | -1.747971 | 3.197455  | 1.177710  |
| C  | -0.130775 | 4.861180  | -0.414400 |
| C  | -1.343502 | 4.465214  | 1.634488  |
| C  | -0.549725 | 5.288508  | 0.841767  |
| H  | 0.490727  | 5.522556  | -1.003570 |

|   |           |           |           |
|---|-----------|-----------|-----------|
| H | -1.642771 | 4.822758  | 2.610924  |
| H | -0.250589 | 6.262590  | 1.207026  |
| C | -2.598196 | 2.309254  | 2.079990  |
| C | -3.953097 | 2.961718  | 2.378816  |
| C | -1.854176 | 1.965713  | 3.376288  |
| H | -2.817555 | 1.341229  | 1.584418  |
| H | -4.471577 | 3.213692  | 1.429385  |
| H | -4.596452 | 2.257133  | 2.948025  |
| H | -3.830373 | 3.888471  | 2.978043  |
| H | -0.892506 | 1.461990  | 3.139354  |
| H | -1.646239 | 2.875537  | 3.977457  |
| H | -2.466076 | 1.275490  | 3.993871  |
| C | -0.011941 | 3.150504  | -2.278731 |
| C | 1.521528  | 3.163172  | -2.353704 |
| C | -0.619443 | 4.017751  | -3.387190 |
| H | -0.326449 | 2.105439  | -2.482752 |
| H | 1.952484  | 2.613763  | -1.491437 |
| H | 1.859761  | 2.666149  | -3.287920 |
| H | 1.918732  | 4.199946  | -2.346511 |
| H | -1.728109 | 3.981323  | -3.334822 |
| H | -0.291161 | 5.074750  | -3.294786 |
| H | -0.307400 | 3.636143  | -4.382790 |
| C | -2.767922 | -2.174949 | 2.067812  |
| C | -2.017950 | -1.880083 | 3.372603  |
| C | -4.160582 | -2.750422 | 2.351138  |
| H | -2.927150 | -1.193887 | 1.574991  |
| H | -1.027929 | -1.428870 | 3.146925  |
| H | -2.596521 | -1.160585 | 3.988997  |
| H | -1.865852 | -2.803276 | 3.970104  |
| H | -4.683178 | -2.969867 | 1.395954  |
| H | -4.096614 | -3.684367 | 2.948338  |
| H | -4.768553 | -2.012178 | 2.916561  |
| C | -0.190017 | -3.144133 | -2.269814 |
| C | -0.840498 | -3.966169 | -3.388252 |
| C | 1.340439  | -3.250620 | -2.332871 |
| H | -0.438167 | -2.080636 | -2.469954 |
| H | -1.945206 | -3.861317 | -3.344729 |
| H | -0.496904 | -3.599408 | -4.379033 |
| H | -0.579114 | -5.041957 | -3.299168 |
| H | 1.797594  | -2.734012 | -1.463781 |
| H | 1.673154  | -4.309861 | -2.329554 |
| H | 1.716130  | -2.769711 | -3.261194 |
| C | 3.248075  | -0.086371 | 0.284946  |
| C | 3.559085  | -1.346773 | 1.112115  |
| C | 4.085842  | -0.109704 | -1.009269 |
| C | 3.618898  | 1.161643  | 1.106027  |
| H | 3.283184  | -2.258879 | 0.538536  |
| H | 2.961693  | -1.356337 | 2.050520  |
| C | 5.063356  | -1.388573 | 1.465343  |
| H | 3.869802  | 0.790931  | -1.625985 |
| H | 3.826830  | -1.002207 | -1.621320 |

|   |          |           |           |
|---|----------|-----------|-----------|
| C | 5.591008 | -0.144685 | -0.664135 |
| H | 3.022479 | 1.203603  | 2.044271  |
| H | 3.386426 | 2.083172  | 0.528246  |
| C | 5.123480 | 1.133495  | 1.459147  |
| H | 5.280533 | -2.301071 | 2.061990  |
| C | 5.896045 | -1.411546 | 0.164886  |
| C | 5.430779 | -0.133547 | 2.287843  |
| H | 6.187855 | -0.161230 | -1.601859 |
| C | 5.956089 | 1.110350  | 0.158625  |
| H | 5.383953 | 2.037547  | 2.051302  |
| H | 5.651438 | -2.321084 | -0.426783 |
| H | 6.980486 | -1.455268 | 0.407939  |
| H | 4.850096 | -0.117371 | 3.236328  |
| H | 6.509020 | -0.158577 | 2.559498  |
| H | 7.041423 | 1.103654  | 0.401526  |
| H | 5.754909 | 2.027546  | -0.437570 |
